# Supplementary material for: Sex-biased gene expression and sequence conservation in Atlantic and Pacific salmon lice (Lepeophtheirus salmonis)
Source: BMC Genomics. 2016 Jul 4;17:483. doi: 10.1186/s12864-016-2835-7 (PMC4932673; doi:10.1186/s12864-016-2835-7)
Supplement: Additional file 2: — Consensus sex-biased and sex-specific transcripts, co-expressed “kunitz cluster”, and newly annotated sex-biased orphans. (XLSX 340 kb) [file 12864_2016_2835_MOESM2_ESM.xlsx]

## Sheet: Male-bias consensus g(533)
Transcripts in this list were significantly overexpressed by male L. salmonis in all populations
Spot ID	Contig ID	BMA2a	BMA2b	Pacific	Average FC	Gene	Description	GeneID	SwissProt Accession
C072R093	5724894	4.31319	3.01442	7.10958	4.8124		5-nucleotidase	936131	O34313
C234R121	5729403	3.36704	2.4582	8.66428	4.82984	PPIase	70 kDa peptidyl-prolyl isomerase		Q43207
C149R137	5722253	869.984	199.28	28.4983	365.921		Acidic repeat-containing protein	93953	Q96QF7
C223R146	5731398	79.2088	43.7485	6.35457	43.104		Actin		Q92192
C104R155	5723792	4.05597	2.26322	10.391	5.57006	AK 1	Adenylate kinase isoenzyme 1	396002	P05081
C118R089	5723792	4.32039	2.05256	10.2695	5.54749	AK 1	Adenylate kinase isoenzyme 1	396002	P05081
C153R147	5735934	2.73801	2.07916	4.8419	3.21969	AK 1	Adenylate kinase isoenzyme 1		P00571
C120R114	5735934	2.46726	1.85649	4.59483	2.97286	AK 1	Adenylate kinase isoenzyme 1		P00571
C031R080	5726729	2.91327	2.14239	7.09262	4.04943	AK 1	Adenylate kinase isoenzyme 1		P00571
C145R046	5730212	1.8477	1.57411	1.61404	1.67862		Alpha-crystallin B chain	396089	Q05713
C088R170	5723251	2.50835	1.84416	2.70926	2.35392		AMP deaminase 2	362015	Q02356
C131R037	5723251	2.59335	1.56755	2.528	2.22963		AMP deaminase 2	362015	Q02356
C189R165	5726306	2.48448	1.61873	3.0696	2.39094		AMP deaminase 2	362015	Q02356
C049R062	5730472	2.48945	1.72276	2.53636	2.24952		AMP deaminase 2		Q01433
C077R006	5732170	4.21371	3.2018	3.30713	3.57421	ACHY-II	Antichymotrypsin-2		P80034
C109R015	5732170	3.82503	2.89967	3.06203	3.26224	ACHY-II	Antichymotrypsin-2		P80034
C165R005	5736347	1.82895	1.79787	1.76764	1.79815		Apoptosis-inducing factor 3	150209	Q96NN9
C030R103	5738199	3.71216	10.4424	7.56942	7.24132	AQP-3	Aquaporin-3	11828	Q8R2N1
C216R168	5723366	3.14654	1.57465	3.72154	2.81424		Aspartate aminotransferase, cytoplasmic		P05201
C082R041	5723366	3.09519	1.72243	3.2711	2.69624		Aspartate aminotransferase, cytoplasmic		P05201
C218R151	5731493	2.87352	1.70401	3.46558	2.68104		Aspartate aminotransferase, cytoplasmic		P05201
C213R126	5731493	2.96296	1.68165	2.99876	2.54779		Aspartate aminotransferase, cytoplasmic		P05201
C246R151	5739377	2.99947	1.78762	3.48343	2.75684		Aspartate aminotransferase, cytoplasmic	396967	P00503
C153R091	5721986	145.91	82.0314	12.0645	80.0021		Brain-specific angiogenesis inhibitor 1	107831	Q3UHD1
C138R117	5721986	79.5049	28.2172	13.8101	40.5107		Brain-specific angiogenesis inhibitor 1	107831	Q3UHD1
C019R003	5729485	150.403	38.6431	11.0336	66.6931		Brain-specific angiogenesis inhibitor 2	230775	Q8CGM1
C052R112	5729485	95.8965	36.4734	5.69867	46.0229		Brain-specific angiogenesis inhibitor 2	230775	Q8CGM1
C169R128	5732928	1.94849	2.76384	1.88502	2.19911		Calcium-binding protein p22	64152	P61023
C018R145	5732928	1.9766	2.85991	1.59405	2.14352		Calcium-binding protein p22	64152	P61023
C231R130	5731046	1.94284	1.53945	8.35391	3.9454		Calcium-transporting ATPase sarcoplasmic/endoplasmic reticulum type	1276852	Q7PPA5
C243R158	5732901	2.05796	1.61068	4.5054	2.72468	CaM	Calmodulin		P41041
C141R096	5723650	313.436	90.6962	62.9929	155.708	CANP A	Calpain-A catalytic subunit	37232	Q11002
C197R005	5723650	127.828	50.9507	12.267	63.6819	CANP A	Calpain-A catalytic subunit	37232	Q11002
C018R134	5724345	56.6982	34.0901	12.6111	34.4665	CANP A	Calpain-A catalytic subunit	37232	Q11002
C021R161	5740796	1.59002	1.55477	2.52368	1.88949	PKA C	cAMP-dependent protein kinase catalytic subunit	34284	P12370
C261R052	5722485	2.1933	1.56104	2.24831	2.00088		cAMP-dependent protein kinase type II regulatory subunit	36041	P81900
C183R004	5734211	102.957	33.4098	10.5492	48.972	CA-I	Carbonic anhydrase 1		P83299
C196R116	5734734	221.818	61.0737	20.0593	100.984	CA-IX	Carbonic anhydrase 9	230099	Q8VHB5
C135R079	5728348	189.162	43.9511	12.4078	81.8403	CA-IX	Carbonic anhydrase 9	230099	Q8VHB5
C131R016	5728348	43.2939	13.1464	23.128	26.5228	CA-IX	Carbonic anhydrase 9	230099	Q8VHB5
C129R163	5734734	37.7685	8.57984	9.7844	18.7109	CA-IX	Carbonic anhydrase 9	230099	Q8VHB5
C161R087	5728347	58.4334	14.9556	28.6487	34.0126	CA-IX	Carbonic anhydrase 9	230099	Q8VHB5
C161R058	5726026	279.043	131.656	18.104	142.934		Carboxypeptidase B		P04069
C070R100	5727360	26.6682	19.1214	5.2464	17.012	CKI-alpha	Casein kinase I isoform alpha	113927	P97633
C244R145	5730422	4.75748	1.80594	3.19033	3.25125	CKI-epsilon	Casein kinase I isoform epsilon	27373	Q9JMK2
C240R150	5736214	1.80807	1.55775	1.95782	1.77455		Chloride intracellular channel exc-4	173314	Q8WQA4
C241R065	5722364	1.56207	1.54704	2.05405	1.72105		Chloride intracellular channel exc-4	173314	Q8WQA4
C083R161	5723285	1.58361	1.55744	1.98332	1.70812		Chloride intracellular channel exc-4	173314	Q8WQA4
C132R106	5722611	1.7148	1.53744	1.75977	1.67067		Chloride intracellular channel exc-4	173314	Q8WQA4
C249R003	5723516	102.557	28.5584	11.5937	47.5696	Dpxt	Chorion peroxidase heavy chain	42131	Q9VEG6
C154R094	5723516	52.9745	16.6757	7.74961	25.7999	Dpxt	Chorion peroxidase heavy chain	42131	Q9VEG6
C176R138	5734855	153.014	30.6558	18.4685	67.3795	Dpxt	Chorion peroxidase heavy chain	42131	Q9VEG6
C204R013	5732444	2.40015	1.66217	2.02904	2.03045		CLECT, C-type lectin (CTL) or carbohydrate-recognition domain (CRD). Many of these domains function as calcium-dependent carbohydrate binding modules.
C162R123	5735288	2.27079	1.54108	1.80492	1.87226		CLECT, C-type lectin (CTL) or carbohydrate-recognition domain (CRD). Many of these domains function as calcium-dependent carbohydrate binding modules.
C076R093	5729338	2.3675	2.0512	2.0627	2.16047	Zeta-1 COP	Coatomer subunit zeta-1	281707	P35604
C207R068	5727933	1.93715	4.11255	1.75856	2.60275		Cystathionine beta-synthase		Q58H57
C058R135	5725247	1.72602	3.68102	1.87402	2.42702		Cystathionine beta-synthase		Q58H57
C257R050	5725247	1.72869	3.70547	1.66293	2.3657		Cystathionine beta-synthase		Q58H57
C257R049	5727933	1.80107	3.50818	1.66405	2.32443		Cystathionine beta-synthase		Q58H57
C261R120	5729574	144.704	80.0215	14.3564	79.694		Cytosolic non-specific dipeptidase	512626	Q3ZC84
C016R073	5729574	34.8054	19.8959	9.16161	21.2876		Cytosolic non-specific dipeptidase	512626	Q3ZC84
C145R086	5725039	2.94179	2.04045	2.14524	2.37582		Cytosolic non-specific dipeptidase	66054	Q9D1A2
C153R150	5725039	2.73054	1.87542	1.95801	2.18799		Cytosolic non-specific dipeptidase	66054	Q9D1A2
C128R022	5726863	5.41182	3.71938	3.68888	4.27336	DMP-4	Dentin matrix protein 4	80752	Q5MJS3
C163R142	5729947	404.28	77.8892	37.0694	173.08	DPP	Dentin sialoprotein	1834	Q9NZW4
C219R149	5729947	378.767	105.585	22.8723	169.075	DPP	Dentin sialoprotein	1834	Q9NZW4
C258R037	5723089	1.69539	2.64836	1.70727	2.017		Dual specificity protein phosphatase 3	1845	P51452
C191R118	5723089	1.82725	2.4135	1.66059	1.96711		Dual specificity protein phosphatase 3	1845	P51452
C251R028	5729213	242.083	149.759	14.3555	135.399		E1_DerP2_DerF2, ML domain. ML domain - MD-2-related lipid recognition domain. This family consists of proteins from plants, animals and fungi, including dust mite allergen Der P 2. It has been implicate in lipid recognition, particularly in the recognition of pathogen related products. A mutation in Npc2 causes a rare form of Niemann-Pick type C2 disease.
C233R055	5722375	3.23011	2.9553	1.91863	2.70135		Ethanolamine-phosphate cytidylyltransferase	89841	O88637
C034R035	5722375	3.20514	2.89914	1.75844	2.62091		Ethanolamine-phosphate cytidylyltransferase	89841	O88637
C131R097	5726648	2.0977	3.55648	7.73483	4.463	FHL-2	Four and a half LIM domains protein 2	63839	O35115
C206R076	5722494	2.19261	3.51038	7.48358	4.39552	FHL-2	Four and a half LIM domains protein 2	510008	Q2KI95
C037R107	5722493	2.17279	3.45288	7.55352	4.39306	FHL-2	Four and a half LIM domains protein 2	510008	Q2KI95
C214R082	5726648	2.20822	3.24898	6.25272	3.90331	FHL-2	Four and a half LIM domains protein 2	63839	O35115
C256R108	5722494	2.21304	3.07284	6.15741	3.81443	FHL-2	Four and a half LIM domains protein 2	510008	Q2KI95
C095R028	5722493	2.08361	2.83004	5.68624	3.5333	FHL-2	Four and a half LIM domains protein 2	510008	Q2KI95
C200R051	5730633	2.16839	3.35546	8.70822	4.74403	FHL-2	Four and a half LIM domains protein 2	510008	Q2KI95
C010R097	5728672	1.72226	2.35097	2.58857	2.2206	FHL-3	Four and a half LIM domains protein 3	504795	Q3ZBI6
C230R040	5733837	3.26891	2.02414	2.85101	2.71469	FBP aldolase	Fructose-bisphosphate aldolase	7959666	O52402
C118R039	5733837	3.38166	2.10008	2.2491	2.57695	FBP aldolase	Fructose-bisphosphate aldolase	7959666	O52402
C069R104	5725910	3.25743	1.87285	2.40521	2.51183	FBP aldolase	Fructose-bisphosphate aldolase	853805	P14540
C085R145	5722226	3.02705	1.83422	1.99035	2.28388	FBP aldolase	Fructose-bisphosphate aldolase	853805	P14540
C122R072	5730284	58.8051	18.6263	8.51298	28.6481		Glutamate [NMDA] receptor-associated protein 1	2907	Q7Z429
C193R132	5725246	2.45345	1.51045	8.47139	4.1451	GluR-6	Glutamate receptor, ionotropic kainate 2		P39087
C160R056	5736933	2.49556	3.10793	2.39753	2.66701	Glutaminyl cyclase	Glutaminyl-peptide cyclotransferase	25797	Q16769
C194R104	5736933	2.47211	2.67946	2.30374	2.4851	Glutaminyl cyclase	Glutaminyl-peptide cyclotransferase	25797	Q16769
C107R029	5731623	2.1497	1.88557	2.41561	2.15029		Glycogen phosphorylase	33386	Q9XTL9
C009R141	5731623	2.06658	1.74274	2.47953	2.09628		Glycogen phosphorylase	33386	Q9XTL9
C085R148	5735054	2.26296	1.61624	3.22346	2.36755		Glycogen phosphorylase	33386	Q9XTL9
C171R004	5727184	2.33752	1.5554	3.51729	2.47007		Glycogen phosphorylase, brain form	505560	Q3B7M9
C103R119	5731439	5.94055	1.84294	2.92885	3.57078		Glycoprotein 3-alpha-L-fucosyltransferase A	39653	Q9VUL9
C131R035	5732747	2.88023	2.46231	7.93951	4.42735		Hexokinase type 2	43191	Q9NFT7
C066R139	5732747	2.74693	2.57916	6.6963	4.00746		Hexokinase type 2	43191	Q9NFT7
C202R150	5723860	3.60753	1.53313	5.01868	3.38645		Histone-lysine N-methyltransferase SETD7	73251	Q8VHL1
C095R021	5732045	1.54415	1.66905	1.76315	1.65878		Hydroxysteroid dehydrogenase-like protein 2	404131	A4FUZ6
C157R058	5732045	1.59687	1.76807	1.51325	1.62606		Hydroxysteroid dehydrogenase-like protein 2	404131	A4FUZ6
C217R028	5729373	2.41707	1.61156	2.08367	2.03743	NS1-binding protein homolog	Influenza virus NS1A-binding protein homolog	446327	Q6DFU2
C125R011	5724933	2.36993	1.71119	3.04967	2.37693	IMPase	Inositol monophosphatase ttx-7	172477	Q19420
C047R043	5724933	2.4114	1.8968	2.61003	2.30608	IMPase	Inositol monophosphatase ttx-7	172477	Q19420
C131R030	5727426	1.72568	1.90804	3.93784	2.52385		Intersectin-2	50618	Q9NZM3
C022R130	5726426	36.6501	18.1892	10.0988	21.646		Kelch-like protein 20	100174619	Q5R7B8
C088R043	5736386	277.113	161.218	30.784	156.372	HGTp type II.4	Keratin-associated protein 6-2	16701	O08884
C057R056	5725610	430.12	105.912	20.1021	185.378		KU, BPTI/Kunitz family of serine protease inhibitors. Serine protease inhibitors. One member of the family is encoded by an alternatively-spliced form of Alzheimers amyloid beta-protein.
C106R052	5725610	67.6542	22.8786	8.39935	32.9774		KU, BPTI/Kunitz family of serine protease inhibitors. Serine protease inhibitors. One member of the family is encoded by an alternatively-spliced form of Alzheimers amyloid beta-protein.
C084R101	5726199	658.664	140.591	43.7921	281.016		KU, BPTI/Kunitz family of serine protease inhibitors. Serine protease inhibitors. One member of the family is encoded by an alternatively-spliced form of Alzheimers amyloid beta-protein.
C259R083	5727965	614.333	175.947	36.5636	275.615		Kunitz_BPTI, Kunitz/Bovine pancreatic trypsin inhibitor domain. Indicative of a protease inhibitor, usually a serine protease inhibitor. Structure is a disulfide rich alpha+beta fold. BPTI (bovine pancreatic trypsin inhibitor) is an extensively studied model structure. Certain family members are similar to the tick anticoagulant peptide (TAP). This is a highly selective inhibitor of factor Xa in …
C259R052	5728037	912.501	190.073	24.2505	375.608		Kunitz/BPTI-like toxin		B5L5M7
C220R106	5728318	6.61731	2.95998	2.59737	4.05822		Lamin Dm0	33782	P08928
C051R107	5728318	2.68021	1.51056	2.87817	2.35631		Lamin Dm0	33782	P08928
C198R051	5736312	2.84648	6.24876	2.33404	3.80976		Leucine-rich repeat-containing protein 20	216011	Q8CI70
C132R156	5727045	2.8673	6.20117	2.16598	3.74482		Leucine-rich repeat-containing protein 20	216011	Q8CI70
C083R132	5727045	2.91618	6.09713	1.762	3.59177		Leucine-rich repeat-containing protein 20	216011	Q8CI70
C250R013	5736312	2.8953	5.70039	1.95043	3.51537		Leucine-rich repeat-containing protein 20	216011	Q8CI70
C039R028	5730431	2.94925	5.60246	2.20862	3.58678		Leucine-rich repeat-containing protein 20	216011	Q8CI70
C040R039	5723015	3.12436	5.10878	2.28751	3.50688		Leucine-rich repeat-containing protein 20	216011	Q8CI70
C137R030	5727945	2.37163	1.6535	5.96795	3.33103	hsBGM	Long-chain-fatty-acid--CoA ligase ACSBG1	23205	Q96GR2
C239R071	5735311	1.62052	1.50283	1.50707	1.54347	LRP	Low-density lipoprotein receptor-related protein	172520	Q04833
C218R004	5723853	2.8063	1.604	1.96562	2.1253		Lysyl oxidase homolog 2		Q5RFQ6
C073R012	5723853	2.74716	1.50565	1.88545	2.04609		Lysyl oxidase homolog 2		Q5RFQ6
C089R070	5733438	43.9067	28.9204	6.2775	26.3682	MRJP-3	Major royal jelly protein 3	406121	Q17060
C177R105	5737431	1.69458	1.53677	1.56717	1.5995		Mariner Mos1 transposase		Q7JQ07
C080R105	5735131	1.81123	2.36095	2.51036	2.22751		MARVEL, Membrane-associating domain. MARVEL domain-containing proteins are often found in lipid-associating proteins - such as Occludin and MAL family proteins. It may be part of the machinery of membrane apposition events, such as transport vesicle biogenesis.
C100R144	5735131	1.84867	2.94736	1.88048	2.22551		MARVEL, Membrane-associating domain. MARVEL domain-containing proteins are often found in lipid-associating proteins - such as Occludin and MAL family proteins. It may be part of the machinery of membrane apposition events, such as transport vesicle biogenesis.
C206R074	5722939	1.87566	2.48962	1.58783	1.98437		MARVEL, Membrane-associating domain. MARVEL domain-containing proteins are often found in lipid-associating proteins - such as Occludin and MAL family proteins. It may be part of the machinery of membrane apposition events, such as transport vesicle biogenesis.
C093R022	5722939	1.57845	2.65814	1.58467	1.94042		MARVEL, Membrane-associating domain. MARVEL domain-containing proteins are often found in lipid-associating proteins - such as Occludin and MAL family proteins. It may be part of the machinery of membrane apposition events, such as transport vesicle biogenesis.
C162R055	5736175	1.81302	1.53532	1.50481	1.61772	MEK kinase 4	Mitogen-activated protein kinase kinase kinase 4		O08648
C026R043	5733180	1.75547	1.60102	3.45744	2.27131	MCT 9	Monocarboxylate transporter 9	66859	Q7TM99
C218R155	5738202	9.93859	3.50976	3.8371	5.76182		Mucin, Mucin-like glycoprotein. This family of trypanosomal proteins resemble vertebrate mucins. The protein consists of three regions. The N and C terminii are conserved between all members of the family, whereas the central region is not well conserved and contains a large number of threonine residues which can be glycosylated. Indirect evidence suggested that these genes might encode the core …
C193R019	5738202	8.5364	3.28563	3.73929	5.18711		Mucin, Mucin-like glycoprotein. This family of trypanosomal proteins resemble vertebrate mucins. The protein consists of three regions. The N and C terminii are conserved between all members of the family, whereas the central region is not well conserved and contains a large number of threonine residues which can be glycosylated. Indirect evidence suggested that these genes might encode the core …
C166R002	5737988	7.72298	2.20694	21.8583	10.5961		Myosin heavy chain, muscle		P05661
C058R114	5732604	5.95954	2.67984	8.08943	5.57627		Myosin heavy chain, muscle		P05661
C197R038	5726082	1.65638	1.59792	2.52684	1.92705	NAD-ME	NAD-dependent malic enzyme 59 kDa isoform, mitochondrial		P37225
C189R088	5722320	2.11458	1.56356	2.24289	1.97368		Neurotrypsin	8492	P56730
C242R156	5727578	2.72354	4.04182	5.28427	4.01654		Ninjurin, Ninjurin. Ninjurin (nerve injury-induced protein) is involved in nerve regeneration and in the formation and function in some tissues.
C096R089	5727578	2.63786	3.65003	4.60756	3.63182		Ninjurin, Ninjurin. Ninjurin (nerve injury-induced protein) is involved in nerve regeneration and in the formation and function in some tissues.
C151R152	5722227	19.951	9.02911	21.9203	16.9668		NNMT_PNMT_TEMT, NNMT/PNMT/TEMT family.
C096R077	5730330	1.70962	1.85476	2.35433	1.9729		Nostrin	115677	Q8IVI9
C009R082	5730330	1.87709	1.74248	2.14371	1.9211		Nostrin	115677	Q8IVI9
C117R131	5724099	1.79193	1.80996	1.85191	1.81793	Dab2-interacting protein 2	Nostrin	329416	Q6WKZ7
C087R153	5724099	1.83744	1.61729	1.80322	1.75265	Dab2-interacting protein 2	Nostrin	329416	Q6WKZ7
C121R150	5721836	5.22951	3.64759	2.45565	3.77758		Outer dense fiber protein 2-like	733263	Q08B20
C063R028	5736377	468.89	97.7274	31.0183	199.212		Papilin	43872	Q868Z9
C183R014	5735466	220.007	41.9608	12.834	91.6007		Papilin	43872	Q868Z9
C240R052	5735466	145.547	35.04	11.8697	64.1523		Papilin	43872	Q868Z9
C132R072	5736377	89.5969	24.7159	20.8116	45.0415		Papilin	43872	Q868Z9
C142R005	5736193	106.824	48.91	12.6885	56.1408		Papilin	43872	Q868Z9
C066R049	5726094	56.705	21.7151	7.97753	28.7992		Papilin	43872	Q868Z9
C244R154	5731295	4.87565	3.01095	5.09239	4.32633		PDZ and LIM domain protein 7	416362	Q679P3
C143R069	5731295	4.3588	3.33405	4.94542	4.21276		PDZ and LIM domain protein 7	416362	Q679P3
C113R048	5725436	2.45031	2.86846	2.03967	2.45281	GLUT1CBP	PDZ domain-containing protein GIPC1	83823	Q9Z254
C082R020	5727228	78.4817	23.4406	5.75343	35.8919	DmPO	Peroxidase	2768671	Q01603
C026R132	5727228	44.7512	14.9223	5.56792	21.7471	DmPO	Peroxidase	2768671	Q01603
C099R060	5728353	1.72123	3.4782	5.15004	3.44982	AtPIP5K3	Phosphatidylinositol-4-phosphate 5-kinase 3	817182	O48709
C153R152	5728353	1.76858	2.85985	4.78831	3.13891	AtPIP5K3	Phosphatidylinositol-4-phosphate 5-kinase 3	817182	O48709
C112R101	5732799	2.93551	1.57882	5.80061	3.43831		Phosphodiest, Type I phosphodiesterase / nucleotide pyrophosphatase. This family consists of phosphodiesterases, including human plasma-cell membrane glycoprotein PC-1 / alkaline phosphodiesterase i / nucleotide pyrophosphatase (nppase). These enzymes catalyse the cleavage of phosphodiester and phosphosulfate bonds in NAD, deoxynucleotides and nucleotide sugars. Also in this family is ATX an auto…
C165R123	5726421	1.70976	1.5944	2.11642	1.80686		Plasma kallikrein light chain		P26262
C011R090	5724319	1.59739	6.8075	3.21056	3.87182		Plasmodium_HRP, Plasmodium histidine-rich protein (HRPII/III). This family consists of several histidine-rich protein II and III sequence from Plasmodium falciparum.
C096R071	5722415	2.27362	1.76511	4.85732	2.96535	pp-GaNTase 13	Polypeptide N-acetylgalactosaminyltransferase 13	114805	Q8IUC8
C212R032	5724223	2.97864	2.10186	5.73003	3.60351	AK	Probable adenylate kinase isoenzyme F38B2.4	181317	Q20140
C246R002	5724336	2.85065	1.97609	5.69109	3.50595	AK	Probable adenylate kinase isoenzyme F38B2.4	181317	Q20140
C028R063	5724336	2.83698	2.10966	5.53443	3.49369	AK	Probable adenylate kinase isoenzyme F38B2.4	181317	Q20140
C194R123	5724223	2.75747	1.91307	5.61403	3.42819	AK	Probable adenylate kinase isoenzyme F38B2.4	181317	Q20140
C068R061	5723229	2.22677	1.71284	4.50679	2.81547	pp-GaNTase 6	Probable N-acetylgalactosaminyltransferase 6	175558	O61394
C157R110	5723229	1.90529	1.75451	3.83134	2.49705	pp-GaNTase 6	Probable N-acetylgalactosaminyltransferase 6	175558	O61394
C252R032	5736372	207.173	69.5688	17.1373	97.9595		Probable serine/threonine-protein kinase clkA	8622923	Q54UA9
C140R085	5726158	1.84219	1.66238	1.98068	1.82842	cAMP-responsive element-binding protein 3-like protein 4	Processed cyclic AMP-responsive element-binding protein 3-like protein 4		Q5UEM8
C006R078	5729932	52.8291	47.6384	8.07993	36.1825		Proclotting enzyme heavy chain		P21902
C048R145	5729932	27.2869	14.6527	10.5465	17.4954		Proclotting enzyme heavy chain		P21902
C118R013	5730672	3.36251	2.51593	4.17358	3.35067	aPC6	Proprotein convertase subtilisin/kexin type 5		Q9NJ15
C210R033	5727568	21.5871	11.6639	4.67673	12.6426		Protein canopy-1	402819	Q2L6L1
C064R030	5722610	2.3336	1.73522	7.83132	3.96671		Protein msta, isoform A	31200	O46040
C159R132	5729256	5.29233	2.69305	3.59726	3.86088		Protein yellow		Q9GP81
C149R072	5737071	2.47055	1.53293	1.84234	1.94861		Protein yippee-like 5		Q4R4Q6
C168R094	5721776	1.86652	2.52275	7.46494	3.95141	Protein IBA RESPONSE 5	Protein-tyrosine-phosphatase IBR5	814997	Q84JU4
C021R032	5734289	2.91567	2.03204	1.79229	2.24666		Putative phospholipase B-like 2	181605	O62146
C067R099	5734289	2.70355	2.14989	1.67405	2.17583		Putative phospholipase B-like 2	181605	O62146
C191R009	5728470	2.45269	2.34895	1.69306	2.1649		Putative phospholipase B-like 2 15 kDa form		Q3TCN2
C169R161	5735967	2.69639	2.01182	1.78588	2.1647		Putative phospholipase B-like 2 15 kDa form		Q3TCN2
C042R133	5723616	406.014	178.626	24.6031	203.081		Putative uncharacterized protein DDB_G0277255	8620953	Q86K40
C264R070	5736119	5.13751	2.56932	4.25398	3.98694	PK	Pyruvate kinase	42620	O62619
C020R004	5736119	4.73714	2.31879	3.86431	3.64008	PK	Pyruvate kinase	42620	O62619
C015R041	5728958	4.61493	2.16733	3.94711	3.57646	PK	Pyruvate kinase	42620	O62619
C155R159	5722104	5.02042	2.14469	3.5129	3.55934	PK	Pyruvate kinase	42620	O62619
C073R125	5728958	3.74979	2.03766	2.70609	2.83118	PK	Pyruvate kinase	42620	O62619
C177R090	5722104	2.64386	1.93797	2.05067	2.21083	PK	Pyruvate kinase	42620	O62619
C225R013	5728018	3.01432	1.58808	3.64194	2.74811		RNA-binding protein 9	493447	Q66JB7
C096R142	5726627	2.97775	1.52028	22.0216	8.83986		RnaseH, RNase H (RNase HI) is an endonuclease that cleaves the RNA strand of an RNA/DNA hybrid in a not sequence-specific manner. One of the important functions of RNase H is to remove Okazaki fragments during DNA replication. RNase H knockout mice lack mitochondrial DNA replication and die as embryos. The retroviral reverse transcriptase contains an RNase H domain that plays an important role in…
C107R164	5725426	7.11738	3.67515	13.448	8.08018		RnaseH, RNase H (RNase HI) is an endonuclease that cleaves the RNA strand of an RNA/DNA hybrid in a not sequence-specific manner. One of the important functions of RNase H is to remove Okazaki fragments during DNA replication. RNase H knockout mice lack mitochondrial DNA replication and die as embryos. The retroviral reverse transcriptase contains an RNase H domain that plays an important role in…
C154R018	5734662	74.8997	53.7716	6.61807	45.0964		RT_LTR, RT_LTR: Reverse transcriptases (RTs) from retrotransposons and retroviruses which have long terminal repeats (LTRs) in their DNA copies but not in their RNA template. RT catalyzes DNA replication from an RNA template, and is responsible for the replication of retroelements. An RT gene is usually indicative of a mobile element such as a retrotransposon or retrovirus. RTs are present in a v…
C096R154	5725719	49.6529	24.1254	7.28704	27.0218		RT_LTR, RT_LTR: Reverse transcriptases (RTs) from retrotransposons and retroviruses which have long terminal repeats (LTRs) in their DNA copies but not in their RNA template. RT catalyzes DNA replication from an RNA template, and is responsible for the replication of retroelements. An RT gene is usually indicative of a mobile element such as a retrotransposon or retrovirus. RTs are present in a v…
C099R164	5728857	44.2756	22.9474	5.15023	24.1244		RT_LTR, RT_LTR: Reverse transcriptases (RTs) from retrotransposons and retroviruses which have long terminal repeats (LTRs) in their DNA copies but not in their RNA template. RT catalyzes DNA replication from an RNA template, and is responsible for the replication of retroelements. An RT gene is usually indicative of a mobile element such as a retrotransposon or retrovirus. RTs are present in a v…
C239R093	5725488	1.92509	1.5585	9.18358	4.22239	SR Ca(2+)-ATPase 1	Sarcoplasmic/endoplasmic reticulum calcium ATPase 1		P70083
C152R050	5736910	1.98315	9.48833	6.39427	5.95525		SCP_GAPR-1_like, SCP_GAPR-1_like: SCP-like extracellular protein domain, golgi-associated plant pathogenesis related protein (GAPR)-like sub-family. The wider family of SCP containing proteins includes plant pathogenesis-related protein 1 (PR-1), CRISPs, mammalian cysteine-rich secretory proteins, which combine SCP with a C-terminal cysteine rich domain, and allergen 5 from vespid venom. It has b…
C118R020	5732404	71.9183	11.2263	8.7204	30.6217		Serine protease persephone	32832	Q9VWU1
C172R160	5727507	1.8262	1.63528	3.48475	2.31541		Serine/threonine-protein kinase Doa	43415	P49762
C182R015	5723100	1.63588	2.39726	1.86784	1.96699		Serpin-Z10	817062	Q9SIR9
C085R086	5723100	1.5952	2.24423	1.80972	1.88305		Serpin-Z10	817062	Q9SIR9
C161R035	5721965	115.694	19.7652	6.79971	47.4196		SERPIN, SERine Proteinase INhibitors (serpins) exhibit conformational polymorphism shifting from native to cleaved, latent, delta, or polymorphic forms. Many serpins, such as antitrypsin and antichymotrypsin, function as serine protease inhibitors which regulate blood coagulation cascades. Non-inhibitory serpins perform many diverse functions such as chaperoning proteins or transporting hormones.…
C215R048	5721965	86.6778	19.8154	11.4466	39.3133		SERPIN, SERine Proteinase INhibitors (serpins) exhibit conformational polymorphism shifting from native to cleaved, latent, delta, or polymorphic forms. Many serpins, such as antitrypsin and antichymotrypsin, function as serine protease inhibitors which regulate blood coagulation cascades. Non-inhibitory serpins perform many diverse functions such as chaperoning proteins or transporting hormones.…
C243R080	5733160	2.82385	2.29823	10.3573	5.1598		SET and MYND domain-containing protein 4	319822	Q8BTK5
C164R111	5724581	1.52119	1.52111	10.3793	4.47386		Smoothelin		Q921U8
C167R125	5734341	94.7495	24.5663	15.4775	44.9311		Sodium-dependent nutrient amino acid transporter 1	6566079	B4JMC1
C124R077	5730771	2.98851	2.02301	2.884	2.63184		Sodium-dependent proline transporter	6534	Q99884
C091R089	5730771	2.75003	1.85225	2.88292	2.49506		Sodium-dependent proline transporter	6534	Q99884
C180R154	5724071	1.63432	2.37048	3.075	2.35993	hSGLT4	Sodium/glucose cotransporter 4	200010	Q2M3M2
C170R069	5724071	1.55501	2.58244	2.76605	2.30116	hSGLT4	Sodium/glucose cotransporter 4	200010	Q2M3M2
C170R033	5736110	4.21591	4.16017	9.26953	5.88187		Solute carrier family 15 member 1	6564	P46059
C243R147	5736110	4.51109	4.14193	8.80788	5.8203		Solute carrier family 15 member 1	6564	P46059
C192R047	5731307	1.50937	1.67327	2.77867	1.98711	GLUT-1	Solute carrier family 2, facilitated glucose transporter member 1	6513	P11166
C072R016	5723875	3.22366	2.47987	4.31572	3.33975	ROAT1-B	Solute carrier family 22 member 6-B	447487	Q66J52
C114R129	5728011	3.56578	1.55581	4.96968	3.36376	ArgBP2	Sorbin and SH3 domain-containing protein 2	114901	O35413
C076R100	5740530	1.53544	1.54044	2.94011	2.00533	SCS-betaA	Succinyl-CoA ligase [ADP-forming] subunit beta, mitochondrial		O97580
C026R038	5730662	1.51585	1.83151	1.96295	1.77011	SCS-betaA	Succinyl-CoA ligase [ADP-forming] subunit beta, mitochondrial	20916	Q9Z2I9
C097R153	5731540	1.97938	4.79545	2.64551	3.14012	SWAP-70	Switch-associated protein 70	423044	Q5F4B2
C241R093	5731540	2.00258	4.17136	2.84631	3.00675	SWAP-70	Switch-associated protein 70	423044	Q5F4B2
C007R130	5724633	2.35256	4.90649	9.77542	5.67816		Testisin	57256	Q9JHJ7
C237R019	5724633	2.19832	4.55416	6.30983	4.3541		Testisin	57256	Q9JHJ7
C037R077	5724616	1.88825	1.56636	3.60844	2.35435	TPO	Thyroid peroxidase	403521	Q8HYB7
C213R048	5734421	22.1114	17.2908	5.00483	14.8023	TFPI-2	Tissue factor pathway inhibitor 2	21789	O35536
C059R051	5727766	4.74161	1.54131	7.35352	4.54548		Titin		Q9I7U4
C043R037	5727766	4.7662	1.50678	7.18596	4.48631		Titin		Q9I7U4
C117R140	5724612	2.39945	1.56781	5.60195	3.18974		Titin		Q9I7U4
C134R146	5733492	2.25574	1.61161	1.94392	1.93709	TAF(II)30	Transcription initiation factor TFIID subunit 10	24075	Q8K0H5
C212R125	5722446	2.03365	2.40097	1.74158	2.05873		Transmembrane protein 184A	202915	Q6ZMB5
C207R146	5728591	2.67786	1.61152	2.01828	2.10255	TPP	Trehalose-phosphate phosphatase	1090943	Q7TWL7
C112R134	5731140	1.86631	1.89453	2.93771	2.23285	TRIC-A	Trimeric intracellular cation channel type A	79041	Q9H6F2
C152R040	5731140	1.86814	1.92796	2.59953	2.13187	TRIC-A	Trimeric intracellular cation channel type A	79041	Q9H6F2
C169R009	5731419	2.94327	1.88355	5.8359	3.55424	TRIC-B	Trimeric intracellular cation channel type B	393145	Q7ZVP8
C240R035	5727328	2.79572	1.68023	6.07881	3.51825	TRIC-B	Trimeric intracellular cation channel type B	393145	Q7ZVP8
C032R118	5727328	2.57441	1.69335	4.89566	3.05447	TRIC-B	Trimeric intracellular cation channel type B	393145	Q7ZVP8
C207R137	5731419	2.46405	1.81673	4.8645	3.04843	TRIC-B	Trimeric intracellular cation channel type B	393145	Q7ZVP8
C147R126	5726554	2.10204	1.51547	7.93641	3.85131	TnI	Troponin I		P05547
C158R134	5727499	322.493	122.025	5.48623	150.001		Tryp_SPc, Trypsin-like serine protease. Many of these are synthesised as inactive precursor zymogens that are cleaved during limited proteolysis to generate their active forms. A few, however, are active as single chain molecules, and others are inactive due to substitutions of the catalytic triad residues.
C200R162	5727499	143.652	57.7146	5.57193	68.9796		Tryp_SPc, Trypsin-like serine protease. Many of these are synthesised as inactive precursor zymogens that are cleaved during limited proteolysis to generate their active forms. A few, however, are active as single chain molecules, and others are inactive due to substitutions of the catalytic triad residues.
C008R159	5732455	44.773	19.0614	5.14215	22.9922		Tryp_SPc, Trypsin-like serine protease. Many of these are synthesised as inactive precursor zymogens that are cleaved during limited proteolysis to generate their active forms. A few, however, are active as single chain molecules, and others are inactive due to substitutions of the catalytic triad residues.
C009R051	5732106	26.9727	11.0371	5.16807	14.3926		Tryp_SPc, Trypsin-like serine protease. Many of these are synthesised as inactive precursor zymogens that are cleaved during limited proteolysis to generate their active forms. A few, however, are active as single chain molecules, and others are inactive due to substitutions of the catalytic triad residues.
C160R074	5732168	421.814	138.67	35.0076	198.497		Tubulin alpha-2 chain	41183	P06604
C203R032	5733632	568.74	192.704	25.9997	262.481		Uncharacterized protein DDB_G0283357	8624043	Q54R73
C037R048	5722948	273.332	93.3372	24.1825	130.284		Uncharacterized protein DDB_G0283357	8624043	Q54R73
C249R007	5729914	224.917	87.2402	15.6788	109.279		Uncharacterized protein DDB_G0283357	8624043	Q54R73
C033R067	5722948	171.115	62.74	18.6188	84.158		Uncharacterized protein DDB_G0283357	8624043	Q54R73
C220R028	5733632	86.8119	58.4118	16.1221	53.7819		Uncharacterized protein DDB_G0283357	8624043	Q54R73
C254R091	5729914	66.5742	44.6162	20.2098	43.8001		Uncharacterized protein DDB_G0283357	8624043	Q54R73
C036R012	5729270	668.269	132.856	66.3968	289.174		Uncharacterized protein DDB_G0283357	8624043	Q54R73
C209R104	5728832	2441.6	500.913	22.7229	988.413		UNKNOWN
C110R005	5722252	1081.4	228.144	42.1825	450.576		UNKNOWN
C104R164	5728832	931.311	205.814	34.1172	390.414		UNKNOWN
C038R016	5722743	742.356	378.964	25.5963	382.305		UNKNOWN
C261R144	5730606	734.016	203.858	21.216	319.697		UNKNOWN
C041R101	5722252	697.077	143.389	31.3585	290.608		UNKNOWN
C112R015	5725952	452.283	275.842	22.4904	250.205		UNKNOWN
C212R168	5731590	427.215	146.577	14.9157	196.236		UNKNOWN
C137R119	5722107	438.42	73.5707	12.5683	174.853		UNKNOWN
C057R123	5735844	334.644	160.864	11.3952	168.968		UNKNOWN
C101R132	5722743	343.423	143.363	17.5222	168.103		UNKNOWN
C077R108	5725952	316.113	147.013	23.1722	162.099		UNKNOWN
C063R104	5725193	315.536	75.1646	18.6127	136.438		UNKNOWN
C150R161	5732297	306.423	77.3045	12.8193	132.182		UNKNOWN
C192R009	5725193	282.586	78.7022	11.6642	124.317		UNKNOWN
C134R150	5727281	263.743	67.6042	24.7897	118.712		UNKNOWN
C225R044	5727529	217.34	119.109	15.1357	117.195		UNKNOWN
C040R138	5735884	140.263	196.131	7.08443	114.493		UNKNOWN
C109R018	5727836	268.818	51.9725	22.1251	114.305		UNKNOWN
C029R159	5723714	236.243	88.8495	17.2859	114.126		UNKNOWN
C064R022	5726170	249.201	70.8934	11.973	110.689		UNKNOWN
C199R157	5735354	163.917	148.098	9.36423	107.126		UNKNOWN
C258R121	5731590	194.665	98.8692	23.5143	105.683		UNKNOWN
C176R077	5722107	190.921	43.7337	10.5697	81.7414		UNKNOWN
C024R027	5724883	105.814	104.381	31.9529	80.716		UNKNOWN
C228R015	5727281	157.721	60.595	19.0806	79.1323		UNKNOWN
C078R013	5735180	183.261	39.0555	14.663	78.9932		UNKNOWN
C153R006	5723970	149.096	59.5012	16.3425	74.9799		UNKNOWN
C227R010	5726826	173.901	41.5545	8.09268	74.5161		UNKNOWN
C116R111	5740202	150.379	58.1092	10.6032	73.0303		UNKNOWN
C114R029	5725932	165.321	38.708	12.9801	72.3362		UNKNOWN
C019R152	5729400	76.2907	113.078	24.8084	71.3925		UNKNOWN
C199R021	5740202	135.003	65.8697	11.7149	70.8626		UNKNOWN
C260R019	5729922	120.944	77.6359	7.65482	68.7449		UNKNOWN
C058R112	5724158	123.102	73.5131	9.25852	68.6244		UNKNOWN
C202R068	5735354	101.026	88.9627	7.04372	65.6776		UNKNOWN
C200R157	5737365	146.586	37.7213	11.4792	65.2623		UNKNOWN
C049R088	5723694	132.413	49.9758	11.8347	64.7413		UNKNOWN
C207R061	5725928	132.52	40.0506	18.6759	63.7487		UNKNOWN
C178R122	5727836	129.775	34.1173	23.1422	62.3448		UNKNOWN
C127R068	5726826	133.94	40.318	9.40803	61.222		UNKNOWN
C120R158	5722371	97.9638	78.7999	6.09183	60.9518		UNKNOWN
C191R137	5735905	129.838	34.7191	17.1179	60.5583		UNKNOWN
C108R110	5725928	113.568	42.4864	21.8288	59.2943		UNKNOWN
C214R145	5725406	124.484	36.1631	9.23842	56.6286		UNKNOWN
C207R074	5735038	112.265	40.1144	16.4669	56.2823		UNKNOWN
C227R153	5727424	112.372	46.7448	8.94286	56.0198		UNKNOWN
C011R030	5723432	106.627	40.0275	14.2487	53.6345		UNKNOWN
C034R064	5737365	114.191	34.6	9.87932	52.89		UNKNOWN
C081R146	5732297	121.45	23.3732	9.79162	51.5384		UNKNOWN
C175R072	5729922	87.8907	50.8695	14.4282	51.0628		UNKNOWN
C026R106	5724259	98.0214	43.3148	11.4501	50.9288		UNKNOWN
C119R014	5735884	82.2909	61.3402	8.44646	50.6925		UNKNOWN
C039R127	5727464	102.873	39.2287	9.22583	50.4424		UNKNOWN
C086R140	5723210	92.718	39.1204	17.4236	49.754		UNKNOWN
C188R080	5727424	97.1492	40.4969	9.49158	49.0459		UNKNOWN
C023R133	5730606	99.3398	35.1587	7.81627	47.4383		UNKNOWN
C073R097	5735905	90.0357	29.5685	14.8832	44.8291		UNKNOWN
C049R151	5725743	39.2643	5.45026	88.682	44.4655		UNKNOWN
C073R150	5735180	93.2269	27.5582	11.42	44.0684		UNKNOWN
C204R162	5723714	85.559	31.709	14.2547	43.8409		UNKNOWN
C253R135	5725743	31.3617	5.03897	92.8787	43.0931		UNKNOWN
C098R092	5725380	51.5138	61.8239	15.2866	42.8748		UNKNOWN
C225R058	5725406	91.3256	28.755	8.23151	42.7707		UNKNOWN
C186R125	5724158	83.5104	33.9255	10.7735	42.7365		UNKNOWN
C251R007	5727464	80.9757	36.7054	7.19157	41.6242		UNKNOWN
C126R144	5724540	61.0891	37.7827	25.4532	41.4417		UNKNOWN
C257R163	5723961	83.5763	29.9924	9.01107	40.8599		UNKNOWN
C207R033	5726014	69.8387	40.7283	9.28935	39.9521		UNKNOWN
C139R008	5722371	76.8256	34.1009	5.51113	38.8126		UNKNOWN
C103R050	5724540	81.3019	25.0612	7.05771	37.8069		UNKNOWN
C165R119	5734782	64.381	26.4895	19.372	36.7475		UNKNOWN
C068R095	5727529	77.1487	23.0927	9.57266	36.6047		UNKNOWN
C175R161	5726170	72.0527	27.8324	9.10703	36.3307		UNKNOWN
C233R157	5735844	39.9983	29.8661	36.6798	35.5147		UNKNOWN
C020R044	5723956	72.7342	18.6751	14.0859	35.1651		UNKNOWN
C143R145	5728266	26.838	44.2468	29.8901	33.6583		UNKNOWN
C116R133	5723210	54.2402	27.0382	18.0208	33.0997		UNKNOWN
C082R088	5722113	74.4168	19.4326	4.93869	32.9293		UNKNOWN
C081R002	5725938	51.7076	32.6471	13.7426	32.6991		UNKNOWN
C143R146	5722113	71.7537	18.5478	7.4498	32.5838		UNKNOWN
C104R137	5723970	59.1447	20.4849	14.9328	31.5208		UNKNOWN
C123R118	5724883	30.8182	37.6378	20.3554	29.6038		UNKNOWN
C082R089	5734003	36.5301	4.47238	41.33	27.4442		UNKNOWN
C227R073	5725380	36.6994	29.8392	14.3356	26.958		UNKNOWN
C145R023	5724259	53.3756	17.663	8.57093	26.5365		UNKNOWN
C055R165	5734782	52.3498	17.4394	9.78158	26.5236		UNKNOWN
C238R127	5734003	36.8863	4.40914	36.1015	25.799		UNKNOWN
C153R122	5731315	57.0356	14.8907	5.41517	25.7805		UNKNOWN
C125R052	5729263	54.2877	17.7599	4.91263	25.6534		UNKNOWN
C018R123	5725938	40.1017	25.462	10.1927	25.2521		UNKNOWN
C014R009	5723956	47.3746	13.9224	13.7197	25.0056		UNKNOWN
C033R147	5723694	45.7459	23.4998	5.63815	24.9613		UNKNOWN
C096R067	5723961	48.0733	15.781	9.71503	24.5231		UNKNOWN
C138R033	5735038	49.3895	17.5623	6.02281	24.3249		UNKNOWN
C049R047	5729263	42.8155	24.2	5.08257	24.0327		UNKNOWN
C057R032	5723432	44.1078	15.275	12.544	23.9756		UNKNOWN
C140R039	5728726	44.3382	17.9969	8.91873	23.7513		UNKNOWN
C077R153	5731315	47.9408	11.697	7.97432	22.5374		UNKNOWN
C243R002	5728266	21.0534	31.5831	14.3151	22.3172		UNKNOWN
C213R044	5725932	45.5784	13.7831	6.04575	21.8024		UNKNOWN
C262R133	5726014	38.8197	19.5715	6.81982	21.737		UNKNOWN
C254R094	5729400	21.3461	22.6628	12.243	18.7506		UNKNOWN
C116R051	5728726	26.1219	8.93235	5.44106	13.4985		UNKNOWN
C169R065	5729015	8.70982	4.06241	20.8445	11.2056		UNKNOWN
C220R102	5729015	9.29224	3.86646	16.8608	10.0065		UNKNOWN
C056R062	5726063	13.4065	5.55392	3.87425	7.61154		UNKNOWN
C206R056	5726063	11.8834	4.14887	6.06266	7.36498		UNKNOWN
C077R031	5728031	10.985	4.44599	5.26077	6.89724		UNKNOWN
C234R071	5728031	10.6237	3.65999	4.52433	6.26933		UNKNOWN
C229R127	5723436	6.99746	2.33039	5.84123	5.05636		UNKNOWN
C174R159	5723436	6.17692	2.08496	5.76121	4.67436		UNKNOWN
C127R126	5725603	6.34981	2.23744	5.00107	4.52944		UNKNOWN
C065R075	5733885	2.6744	1.78181	9.02846	4.49489		UNKNOWN
C265R045	5733885	2.71828	1.8099	8.55716	4.36178		UNKNOWN
C185R035	5724148	1.73788	1.66985	9.62522	4.34432		UNKNOWN
C105R144	5725185	4.13937	3.58215	5.13067	4.28407		UNKNOWN
C062R107	5725185	3.81347	3.30841	4.78331	3.9684		UNKNOWN
C063R034	5722185	4.26013	1.83592	5.49992	3.86532		UNKNOWN
C194R150	5722185	3.90223	1.84797	5.61024	3.78682		UNKNOWN
C043R147	5724396	4.97676	2.0146	4.25391	3.74842		UNKNOWN
C052R034	5724396	6.45531	1.87451	2.88965	3.73982		UNKNOWN
C201R116	5725392	4.07071	2.01558	4.8457	3.644		UNKNOWN
C100R003	5725269	1.936	1.70642	7.24671	3.62971		UNKNOWN
C233R145	5725392	3.9713	1.86728	4.7992	3.54593		UNKNOWN
C001R032	5724148	1.60847	1.58519	7.401	3.53155		UNKNOWN
C037R004	5724215	3.19782	2.59663	4.67322	3.48923		UNKNOWN
C210R133	5724215	3.20139	2.7699	4.44008	3.47046		UNKNOWN
C100R085	5725603	4.4871	1.76592	3.97697	3.40999		UNKNOWN
C261R159	5736012	2.86792	2.57387	4.58269	3.34149		UNKNOWN
C011R078	5729182	1.92722	4.62407	3.19424	3.24851		UNKNOWN
C116R015	5736012	2.96663	2.74126	3.9372	3.21503		UNKNOWN
C102R110	5723074	2.54918	2.64835	4.39859	3.19871		UNKNOWN
C083R080	5726810	2.16471	1.77565	5.63303	3.19113		UNKNOWN
C108R094	5731233	1.64195	1.98615	5.89513	3.17441		UNKNOWN
C057R060	5723074	2.49202	2.84603	4.15059	3.16288		UNKNOWN
C218R165	5726810	2.04941	1.63895	5.6505	3.11296		UNKNOWN
C194R099	5728733	2.03687	2.77742	4.35165	3.05531		UNKNOWN
C131R068	5725269	1.70056	1.58549	5.87021	3.05209		UNKNOWN
C150R042	5723990	1.63853	2.97864	4.33081	2.98266		UNKNOWN
C102R008	5729182	1.78935	3.90238	3.24081	2.97751		UNKNOWN
C092R027	5731233	1.57961	1.93742	5.40853	2.97519		UNKNOWN
C116R068	5733257	2.74932	3.15877	2.99154	2.96654		UNKNOWN
C180R064	5724603	3.59375	2.03275	3.14113	2.92254		UNKNOWN
C224R108	5729357	2.38323	1.65282	4.67004	2.90203		UNKNOWN
C191R163	5726506	2.86144	1.87167	3.90288	2.87867		UNKNOWN
C039R154	5728943	2.39882	2.28366	3.94902	2.87717		UNKNOWN
C065R062	5724603	3.56484	2.08582	2.91219	2.85428		UNKNOWN
C140R044	5728943	2.31613	2.30856	3.92054	2.84841		UNKNOWN
C207R099	5723990	1.5132	2.73397	4.17275	2.80664		UNKNOWN
C034R059	5728733	1.86989	2.4897	4.04496	2.80151		UNKNOWN
C141R023	5729357	2.08638	1.54943	4.71043	2.78208		UNKNOWN
C007R025	5723197	2.70235	1.53673	3.92876	2.72261		UNKNOWN
C200R063	5728629	2.12654	4.37998	1.65972	2.72208		UNKNOWN
C175R029	5723197	2.58906	1.60618	3.88811	2.69445		UNKNOWN
C215R134	5727991	4.04678	1.78013	2.06148	2.62947		UNKNOWN
C015R030	5722846	2.6114	1.96475	3.31128	2.62914		UNKNOWN
C134R019	5727846	3.3956	1.826	2.60564	2.60908		UNKNOWN
C216R051	5735236	2.34574	2.43978	3.02577	2.60376		UNKNOWN
C022R062	5730454	1.78807	1.72784	4.23811	2.58468		UNKNOWN
C082R071	5730454	1.65799	2.27404	3.81714	2.58306		UNKNOWN
C162R070	5726417	1.96849	1.86213	3.84429	2.5583		UNKNOWN
C036R126	5726506	2.74665	1.5983	3.32387	2.55627		UNKNOWN
C017R145	5733257	2.40423	2.6116	2.6159	2.54391		UNKNOWN
C185R106	5736039	1.62667	1.5815	4.40588	2.53802		UNKNOWN
C263R123	5722846	2.27124	1.89753	3.44157	2.53678		UNKNOWN
C120R152	5727846	2.96983	1.66489	2.93687	2.52386		UNKNOWN
C086R142	5730964	2.884	1.60751	3.0751	2.5222		UNKNOWN
C045R164	5735236	2.50564	2.48573	2.42897	2.47344		UNKNOWN
C031R137	5728629	1.93041	3.92933	1.5544	2.47138		UNKNOWN
C206R040	5730964	2.7527	1.54317	3.10531	2.46706		UNKNOWN
C163R127	5736039	1.6229	1.50725	4.1918	2.44065		UNKNOWN
C214R054	5725019	2.43531	2.38387	2.40429	2.40782		UNKNOWN
C075R010	5727991	3.40077	1.71635	1.9031	2.34007		UNKNOWN
C118R160	5734389	2.35659	1.55296	3.02786	2.31247		UNKNOWN
C011R048	5734389	2.31547	1.73088	2.73565	2.26067		UNKNOWN
C165R169	5726417	1.82959	2.08972	2.78028	2.23319		UNKNOWN
C111R067	5725466	1.81205	1.75895	3.00454	2.19185		UNKNOWN
C133R151	5725019	2.08887	2.19975	2.27825	2.18896		UNKNOWN
C073R143	5736781	1.93224	2.16491	2.20259	2.09991		UNKNOWN
C045R141	5738031	1.51386	2.29946	2.45036	2.0879		UNKNOWN
C187R083	5736781	2.08786	2.11947	1.96645	2.05793		UNKNOWN
C086R043	5725466	1.78181	1.76218	2.62632	2.05677		UNKNOWN
C152R167	5738031	1.64137	2.39267	2.08354	2.03919		UNKNOWN
C069R049	5738592	1.92086	1.65257	2.17722	1.91688		UNKNOWN
C036R155	5738592	1.78271	1.62351	1.9655	1.79058		UNKNOWN
C109R088	5729877	1.71159	1.68069	1.88935	1.76054		UNKNOWN
C173R139	5729877	1.59155	1.7651	1.86448	1.74038		UNKNOWN
C135R017	5731236	1294.3	583.57	37.1401	638.337		UNKNOWN
C130R170	5723951	898.593	321.152	35.1683	418.305		UNKNOWN
C138R163	5732947	890.417	318.29	26.104	411.604		UNKNOWN
C203R149	5735608	671.116	165.786	41.4858	292.796		UNKNOWN
C066R101	5725403	603.099	167.49	38.5094	269.7		UNKNOWN
C031R049	5725231	652.562	115.077	12.7577	260.132		UNKNOWN
C091R125	5722378	487.417	96.1908	37.5715	207.06		UNKNOWN
C259R116	5724811	361.524	150.702	23.7141	178.647		UNKNOWN
C072R077	5724255	374.622	120.582	13.5008	169.568		UNKNOWN
C153R041	5728702	334.055	82.825	22.2295	146.37		UNKNOWN
C166R127	5735181	237.073	114.33	23.7568	125.053		UNKNOWN
C049R016	5734654	259.402	61.5863	23.5444	114.844		UNKNOWN
C094R057	5722775	245.646	52.8916	19.0717	105.87		UNKNOWN
C244R108	5723896	245.918	46.9953	12.4402	101.784		UNKNOWN
C049R129	5732585	215.395	53.1248	20.2882	96.2693		UNKNOWN
C021R034	5723480	130.634	95.9883	30.6553	85.7591		UNKNOWN
C241R153	5724591	193.209	48.3393	6.86497	82.8044		UNKNOWN
C196R168	5734970	174.557	44.1275	28.3683	82.3509		UNKNOWN
C202R169	5722495	175.754	56.545	11.4851	81.2613		UNKNOWN
C010R085	5740030	136.463	76.4053	12.6609	75.1765		UNKNOWN
C025R088	5722161	166.764	45.3965	11.582	74.5807		UNKNOWN
C073R042	5721968	162.031	50.2647	11.1531	74.4829		UNKNOWN
C061R158	5735959	124.192	80.2262	6.23244	70.2168		UNKNOWN
C050R104	5735508	149.612	31.5583	14.8739	65.3481		UNKNOWN
C075R053	5727838	115.772	38.1643	16.5018	56.8127		UNKNOWN
C097R036	5727102	104.531	39.7963	9.38659	51.238		UNKNOWN
C220R063	5736030	100.945	41.6978	10.537	51.06		UNKNOWN
C168R068	5725921	75.851	36.5779	12.4935	41.6408		UNKNOWN
C168R145	5736936	81.6804	21.3818	10.512	37.858		UNKNOWN
C135R035	5735731	72.3401	20.4219	11.6228	34.7949		UNKNOWN
C198R083	5729580	63.9387	28.862	6.36636	33.0557		UNKNOWN
C042R116	5740865	64.7327	18.1245	11.6842	31.5138		UNKNOWN
C157R149	5726092	42.31	32.7442	8.1311	27.7284		UNKNOWN
C228R167	5735862	51.0393	21.7886	5.00387	25.9439		UNKNOWN
C048R120	5728185	48.4026	21.8342	4.60492	24.9472		UNKNOWN
C210R046	5734239	37.3889	19.8491	7.56069	21.5996		UNKNOWN
C219R097	5724609	32.0136	20.3998	7.15133	19.8549		UNKNOWN
C186R169	5723083	24.9964	12.2929	9.1712	15.4868		UNKNOWN
C241R167	5728199	24.4203	11.7344	5.30689	13.8205		UNKNOWN
C087R144	5727149	20.9684	13.9456	5.17987	13.3646		UNKNOWN
C079R020	5731189	19.8256	6.49649	11.1123	12.4781		UNKNOWN
C175R152	5722887	18.0272	7.38859	11.135	12.1836		UNKNOWN
C135R082	5735599	16.3083	8.88494	6.73069	10.6413		UNKNOWN
C116R070	5738246	10.6174	16.9625	3.87645	10.4855		UNKNOWN
C262R126	5735870	11.215	12.0717	4.85009	9.37894		UNKNOWN
C044R075	5726750	12.82	7.03766	2.88041	7.57934		UNKNOWN
C043R072	5726089	13.1313	6.35751	3.24013	7.57632		UNKNOWN
C124R146	5737648	2.06725	1.68384	12.1271	5.29272		UNKNOWN
C180R043	5727006	1.51883	1.59401	11.7059	4.93959		UNKNOWN
C132R015	5723033	3.4701	2.08436	8.10131	4.55192		UNKNOWN
C120R023	5722492	1.64225	1.53482	10.252	4.47635		UNKNOWN
C174R108	5725557	1.85834	1.8253	8.38408	4.02257		UNKNOWN
C227R047	5722697	4.25301	1.66844	6.06255	3.99467		UNKNOWN
C116R074	5722562	1.90852	1.5492	7.57897	3.67889		UNKNOWN
C197R014	5734718	4.29585	1.99111	4.63203	3.63966		UNKNOWN
C152R096	5733141	1.93908	1.5293	7.21692	3.56177		UNKNOWN
C219R167	5734072	3.78132	2.15817	4.57679	3.50543		UNKNOWN
C155R133	5722821	3.78337	1.89552	4.76485	3.48124		UNKNOWN
C133R144	5736051	2.44554	1.56053	5.65321	3.21976		UNKNOWN
C106R048	5730491	2.37641	2.46804	4.74156	3.19534		UNKNOWN
C096R035	5734182	2.34614	1.66502	5.32637	3.11251		UNKNOWN
C041R052	5727108	1.57664	1.59936	6.15774	3.11124		UNKNOWN
C248R140	5724383	4.70174	1.7616	2.75127	3.07154		UNKNOWN
C051R162	5721852	2.36888	1.59888	4.95941	2.97573		UNKNOWN
C252R004	5725942	2.42276	2.36311	4.12556	2.97048		UNKNOWN
C266R064	5722516	1.78534	1.6321	5.15927	2.8589		UNKNOWN
C107R146	5726979	2.89907	1.89162	3.69351	2.82807		UNKNOWN
C091R050	5738452	1.80468	1.56648	4.58224	2.65113		UNKNOWN
C213R070	5722584	2.25226	2.67934	3.00251	2.6447		UNKNOWN
C182R103	5727409	2.55609	1.5596	3.68222	2.59931		UNKNOWN
C124R153	5730394	1.78986	1.96657	3.72859	2.49501		UNKNOWN
C113R120	5736701	1.55318	1.96861	3.7428	2.42153		UNKNOWN
C194R022	5729298	3.61081	1.53155	1.89044	2.34427		UNKNOWN
C044R132	5725037	2.30888	2.51994	1.91378	2.24753		UNKNOWN
C148R038	5737265	1.9567	2.34414	2.28702	2.19595		UNKNOWN
C223R056	5724544	1.78299	1.74944	3.01613	2.18285		UNKNOWN
C231R037	5735714	1.6996	1.57818	3.26929	2.18236		UNKNOWN
C161R122	5727408	1.57193	2.4809	2.44679	2.16654		UNKNOWN
C137R101	5730733	2.74002	1.53766	2.18024	2.15264		UNKNOWN
C247R165	5732314	2.28288	1.576	2.56139	2.14009		UNKNOWN
C061R006	5729823	2.18263	1.57662	2.4516	2.07028		UNKNOWN
C032R033	5731207	1.94372	1.88684	2.29921	2.04326		UNKNOWN
C189R028	5729801	1.74724	1.69025	2.47442	1.97064		UNKNOWN
C105R003	5734705	1.95279	1.55832	2.10567	1.87226		UNKNOWN
C028R146	5729187	2.13376	1.71993	1.76099	1.87156		UNKNOWN
C146R073	5738624	1.59248	2.03986	1.94752	1.85995		UNKNOWN
C151R110	5722175	2.05997	1.59613	1.91197	1.85602		UNKNOWN
C049R162	5722818	1.92654	2.02476	1.58925	1.84685		UNKNOWN
C098R101	5726822	2.03237	1.59751	1.73092	1.78693		UNKNOWN
C178R035	5736938	1.60571	1.72985	1.75166	1.69574		UNKNOWN
C179R049	5724434	1.62927	1.62132	1.61756	1.62272		UNKNOWN
C047R110	5725283	1.59177	1.66066	1.57975	1.61073		UNKNOWN
C101R028	5734762	1.79155	1.76727	2.27657	1.94513	UDPGP	UTP--glucose-1-phosphate uridylyltransferase	7360	Q16851
C152R160	5734762	1.63294	1.85639	2.07168	1.85367	UDPGP	UTP--glucose-1-phosphate uridylyltransferase	7360	Q16851
C145R155	5735497	2.78002	2.26509	6.46673	3.83728		Voltage-gated potassium channel subunit beta-2	29738	P62483
C028R002	5735497	2.62126	2.15255	5.26662	3.34681		Voltage-gated potassium channel subunit beta-2	29738	P62483
C152R163	5730962	3.13034	1.72391	2.13762	2.33063		WW domain-containing protein tag-325	175636	P46941
C134R018	5732606	2.85119	2.30176	3.66537	2.93944		Zinc metalloproteinase nas-15	180426	P55115
C101R073	5732606	2.22763	2.1267	3.40761	2.58731		Zinc metalloproteinase nas-15	180426	P55115
C083R024	5729499	167.238	19.6358	9.49594	65.4564		ZnMc_adamalysin_II_like, Zinc-dependent metalloprotease; adamalysin_II_like subfamily. Adamalysin II is a snake venom zinc endopeptidase. This subfamily contains other snake venom metalloproteinases, as well as membrane-anchored metalloproteases belonging to the ADAM family. ADAMs (A Disintegrin And Metalloprotease) are glycoproteins, which play roles in cell signaling, cell fusion, and cell-cell…

## Sheet: Female-bias consensus g(658)
Transcripts in this list were significantly overexpressed by female L. salmonis in all populations
Spot ID	Contig ID	BMA2a	BMA2b	Pacific	Average FC	Gene	Description	GeneID	SwissProt Accession
C029R007	5725387	1.95927	2.04524	3.3572	2.4539	Hsp10	10 kDa heat shock protein, mitochondrial	100049361	Q9W6X3
C114R041	5728233	2.02943	2.10496	2.78616	2.30685	Hsp10	10 kDa heat shock protein, mitochondrial	100049361	Q9W6X3
C198R080	5728233	2.02136	1.99849	3.0649	2.36158	Hsp10	10 kDa heat shock protein, mitochondrial	100049361	Q9W6X3
C255R068	5725387	1.92657	2.07827	3.25884	2.42123	Hsp10	10 kDa heat shock protein, mitochondrial	100049361	Q9W6X3
C068R062	5731334	2.30691	2.47315	3.49666	2.75891	PPIase	39 kDa FK506-binding nuclear protein	41860	P54397
C094R023	5731334	2.32661	2.44485	3.3869	2.71945	PPIase	39 kDa FK506-binding nuclear protein	41860	P54397
C151R094	5726138	1.61573	2.39725	2.69771	2.2369	HSP-60	60 kDa heat shock protein, mitochondrial	32045	O02649
C162R149	5726138	1.59689	2.31969	3.1572	2.35793	HSP-60	60 kDa heat shock protein, mitochondrial	32045	O02649
C021R099	5721867	1.54851	2.291	2.55246	2.13066	HSP-60	60 kDa heat shock protein, mitochondrial	32045	O02649
C121R025	5724331	2.62475	1.91217	2.48634	2.34109		60S ribosome subunit biogenesis protein NIP7 homolog	553616	Q503P2
C223R029	5724331	2.37841	1.87975	1.76564	2.00793		60S ribosome subunit biogenesis protein NIP7 homolog	553616	Q503P2
C208R017	5721801	1.81182	1.62286	1.69584	1.71017	PRKA1	A kinase anchor protein 1, mitochondrial	8165	Q92667
C175R014	5733170	1.50389	1.80344	5.85283	3.05339		Alpha-ketoglutarate-dependent dioxygenase alkB homolog 2	121642	Q6NS38
C036R083	5736895	49.1288	1.92142	61.5034	37.5179		An_peroxidase, Animal haem peroxidase.
C064R077	5736895	57.1101	2.04413	73.9481	44.3674		An_peroxidase, Animal haem peroxidase.
C054R040	5739021	2.09678	2.34317	2.71837	2.38611	APC4	Anaphase-promoting complex subunit 4	100172595	Q5RAQ5
C062R057	5734966	1.50253	1.75962	1.86374	1.70863	APC5	Anaphase-promoting complex subunit 5	51433	Q9UJX4
C107R004	5731017	1.7475	1.82076	1.93358	1.83395		ATP-dependent RNA helicase DDX54	71990	Q8K4L0
C126R153	5731017	1.92649	1.88079	2.43121	2.0795		ATP-dependent RNA helicase DDX54	71990	Q8K4L0
C056R048	5732227	1.63739	1.5095	1.64309	1.59666	ARP1B	Beta-centractin	10120	P42025
C135R130	5730613	2.08734	2.01259	1.80012	1.96668		Brix domain-containing protein 2	518501	Q3SZZ0
C150R158	5731750	2.17172	1.58349	2.40006	2.05175		Bystin	5887806	A9UNU6
C085R047	5727056	2.33744	1.94122	4.30439	2.86102		C-factor		P21158
C185R162	5722817	2.68327	2.1681	4.33375	3.06171		C-factor		P21158
C036R028	5735794	2.0701	1.75088	2.074	1.96499		Caseinolytic peptidase B protein homolog	20480	Q60649
C193R015	5730736	2.46218	3.06312	1.61814	2.38115		CDC27, DNA polymerase subunit Cdc27. This protein forms the C subunit of DNA polymerase delta. It carries the essential residues for binding to the Pol1 subunit of polymerase alpha, from residues 293-332, which are characterised by the motif D-G-VT, referred to as the DPIM motif. The first 160 residues of the protein form the minimal domain for binding to the B subunit, Cdc1, of polymerase delta,…
C043R090	5727269	4.04287	2.00174	7.37073	4.47178		Cell division control protein 6 homolog	23834	O89033
C118R086	5727269	5.00718	2.35826	10.3689	5.91144		Cell division control protein 6 homolog	23834	O89033
C208R148	5736954	1.5559	1.52465	1.80087	1.62714		Centromere/kinetochore protein zw10 homolog	363059	Q4V8C2
C031R048	5727969	1.83477	1.94004	1.66611	1.81364	HP1 beta	Chromobox protein homolog 1	10951	P83916
C051R152	5727322	1.74975	1.94026	1.66572	1.78524	HP1 beta	Chromobox protein homolog 1	10951	P83916
C152R067	5735821	1.82327	2.34994	1.77287	1.98202	HP1 beta	Chromobox protein homolog 1	10951	P83916
C221R088	5727322	1.82076	1.91943	1.75812	1.83277	HP1 beta	Chromobox protein homolog 1	10951	P83916
C235R057	5735821	1.71519	2.3553	1.51902	1.86317	HP1 beta	Chromobox protein homolog 1	10951	P83916
C245R085	5727969	1.79156	1.98754	1.74064	1.83991	HP1 beta	Chromobox protein homolog 1	10951	P83916
C111R086	5733093	1.98841	2.13121	1.61389	1.91117	HP1 beta	Chromobox protein homolog 1	10951	P83916
C115R051	5728285	1.88208	1.98206	1.872	1.91204	HP1 beta	Chromobox protein homolog 1	10951	P83916
C120R106	5730836	1.64619	2.18702	1.65547	1.82956	HP1 beta	Chromobox protein homolog 1	10951	P83916
C129R046	5733611	1.69963	2.11045	1.53086	1.78031	HP1 beta	Chromobox protein homolog 1	10951	P83916
C161R049	5722567	1.8835	2.06887	2.02433	1.99223	HP1 beta	Chromobox protein homolog 1	10951	P83916
C189R133	5735600	1.67957	2.2128	1.63622	1.84286	HP1 beta	Chromobox protein homolog 1	10951	P83916
C263R134	5736247	1.79563	2.01733	1.71971	1.84422	HP1 beta	Chromobox protein homolog 1	10951	P83916
C213R025	5730451	2.81802	1.81917	2.39197	2.34306	Chromokinesin	Chromosome-associated kinesin KIF4	395823	Q90640
C073R021	5726631	2.0736	1.67415	2.5629	2.10355		Cleavage and polyadenylation specificity factor subunit 5	394092	Q7T3C6
C144R014	5725471	2.00538	2.13434	2.07484	2.07152		Cleavage and polyadenylation specificity factor subunit 5	394092	Q7T3C6
C144R072	5730157	2.20869	2.10286	2.38019	2.23058		Cleavage and polyadenylation specificity factor subunit 5	394092	Q7T3C6
C179R027	5726631	1.88402	1.67727	2.64696	2.06941		Cleavage and polyadenylation specificity factor subunit 5	394092	Q7T3C6
C201R144	5730157	1.97242	2.19676	2.10431	2.09116		Cleavage and polyadenylation specificity factor subunit 5	394092	Q7T3C6
C229R033	5725471	1.94597	2.2805	2.08953	2.10533		Cleavage and polyadenylation specificity factor subunit 5	394092	Q7T3C6
C060R156	5724346	1.71846	1.58401	2.08621	1.79623	CSTF 50 kDa subunit	Cleavage stimulation factor 50 kDa subunit	1477	Q05048
C088R067	5732730	2.77937	1.59423	3.96397	2.77919	C1qBP	Complement component 1 Q subcomponent-binding protein, mitochondrial	29681	O35796
C161R006	5725388	2.63188	1.63589	2.77081	2.34619	C1qBP	Complement component 1 Q subcomponent-binding protein, mitochondrial	29681	O35796
C063R163	5731407	2.30345	1.86534	2.41174	2.19351	hCAP-H	Condensin complex subunit 2	23397	Q15003
C128R071	5723950	2.00672	1.98263	1.5721	1.85381	hCAP-G	Condensin complex subunit 3	64151	Q9BPX3
C159R109	5723950	1.93942	2.16644	1.6757	1.92719	hCAP-G	Condensin complex subunit 3	64151	Q9BPX3
C154R061	5730837	3.8328	1.77088	9.70391	5.10253		Cut8, Cut8. In Schizosaccharomyces pombe, Cut8 is a nuclear envelope protein that physically interacts with and tethers 26S proteasome in the nucleus resulting in the nuclear accumulation of proteasome. Cut8 is a proteasome substrate and amino terminal residues 1-72 are polyubiquitinated and function as a degron tag. Ubiquitination of the amino terminal is essential to the function of Cut8. Lysin…
C204R071	5730837	3.87976	1.53657	8.74005	4.71879		Cut8, Cut8. In Schizosaccharomyces pombe, Cut8 is a nuclear envelope protein that physically interacts with and tethers 26S proteasome in the nucleus resulting in the nuclear accumulation of proteasome. Cut8 is a proteasome substrate and amino terminal residues 1-72 are polyubiquitinated and function as a degron tag. Ubiquitination of the amino terminal is essential to the function of Cut8. Lysin…
C180R069	5730794	1.90168	2.30809	1.86381	2.02452		CWF19-like protein 1	100173021	Q5R8R4
C247R012	5730794	1.88113	2.11336	1.75539	1.91663		CWF19-like protein 1	100173021	Q5R8R4
C157R089	5739684	2.001	1.54306	4.75172	2.76526	Cyclin-A	Cyclin-A1		Q92161
C190R059	5722464	2.62763	1.53581	4.01325	2.72556	CDK2-associated protein 2	Cyclin-dependent kinase 2-associated protein 2	10263	O75956
C137R145	5733082	1.8384	1.56369	2.14231	1.84813	Cyclin-L	Cyclin-L1	114121	Q9R1Q2
C161R019	5732964	1.65593	1.62349	1.55593	1.61178		Cysteine and histidine-rich domain-containing protein 1	393310	Q7T3F7
C246R014	5735932	1.51479	2.01482	1.51178	1.68046		Cysteine-rich with EGF-like domain protein 2	393495	Q7SXF6
C115R046	5725590	1.53021	2.20031	1.64646	1.79233		CYTH-like_AC_IV-like, Adenylyl cyclase (AC) class IV-like, a subgroup of the CYTH-like superfamily. This subgroup contains class IV ACs and similar proteins. AC catalyzes the conversion of ATP to 3,5-cyclic AMP (cAMP) and PPi. cAMP is a key signaling molecule which conveys a variety of signals in different cell types. In prokaryotes, cAMP is a catabolite derepression signal which triggers the exp…
C097R134	5733486	2.01116	1.53306	3.66728	2.40383		Cytoplasmic tRNA 2-thiolation protein 1	548460	Q5FW05
C175R041	5732711	1.92147	1.64376	2.48243	2.01588		DEAD-box ATP-dependent RNA helicase 5	4342981	Q6YS30
C137R049	5723676	1.89887	1.51745	1.73641	1.71758	DOHH	Deoxyhypusine hydroxylase	4801977	Q297S2
C054R014	5727860	1.70137	2.33628	1.93015	1.98926	TdT-interacting factor 2	Deoxynucleotidyltransferase terminal-interacting protein 2	30836	Q5QJE6
C074R052	5735030	2.62291	1.67477	2.88585	2.39451		Digestive organ expansion factor homolog	421384	Q5ZLG3
C192R057	5738385	2.5887	1.71044	2.60263	2.30059	Dnmt1	DNA (cytosine-5)-methyltransferase 1	396011	Q92072
C226R007	5735931	2.91082	1.66213	3.30107	2.62467		DNA polymerase delta subunit 2	5425	P49005
C248R011	5735931	2.49085	1.5039	3.33688	2.44388		DNA polymerase delta subunit 2	5425	P49005
C041R042	5726671	2.63775	2.26271	2.44359	2.44802	p49	DNA primase small subunit	5557	P49642
C193R122	5726671	2.29772	2.12477	2.8644	2.42896	p49	DNA primase small subunit	5557	P49642
C111R073	5721977	1.71854	1.82928	2.00861	1.85215		DNA replication complex GINS protein PSF1	69270	Q9CZ15
C201R138	5730784	2.88593	2.70229	1.97336	2.52052		DNA replication licensing factor MCM2	4171	P49736
C226R002	5730784	2.88163	2.42764	1.73419	2.34782		DNA replication licensing factor MCM2	4171	P49736
C220R014	5731815	3.16602	3.19235	1.76764	2.70867		DNA replication licensing factor MCM3	17215	P25206
C060R153	5726164	2.42366	2.84617	1.69509	2.32164		DNA replication licensing factor MCM4	35679	Q26454
C148R146	5726164	2.68202	2.5948	1.80853	2.36179		DNA replication licensing factor MCM4	35679	Q26454
C054R095	5728676	2.48054	2.77598	1.64266	2.29972		DNA replication licensing factor mcm5	550081	Q561P5
C127R152	5728676	2.28744	2.28225	1.58479	2.05149		DNA replication licensing factor mcm5	550081	Q561P5
C013R044	5724469	2.94801	2.19592	2.1268	2.42358	DmMCM6	DNA replication licensing factor Mcm6	31603	Q9V461
C110R127	5724469	3.06797	2.22994	2.11539	2.4711	DmMCM6	DNA replication licensing factor Mcm6	31603	Q9V461
C135R002	5734772	2.35613	1.93078	2.16147	2.14946		DNA replication licensing factor Mcm6	1279642	Q7Q0Q1
C158R062	5738957	4.76499	3.19602	2.62244	3.52782	xMCM7-A	DNA replication licensing factor mcm7-A	397852	Q91876
C165R008	5738957	4.99732	2.96553	2.34862	3.43716	xMCM7-A	DNA replication licensing factor mcm7-A	397852	Q91876
C024R122	5727496	2.57757	2.57531	2.33366	2.49551	TopBP1	DNA topoisomerase 2-binding protein 1		Q92547
C039R096	5728722	2.00568	1.87184	1.75011	1.87588		DNA topoisomerase 3-beta-1	8940	O95985
C254R137	5728722	1.96188	1.91302	1.69499	1.85663		DNA topoisomerase 3-beta-1	8940	O95985
C042R127	5722454	1.89113	1.55056	2.28079	1.90749		DNA-binding protein HEXBP		Q04832
C104R059	5722454	1.88662	1.75532	2.9491	2.19701		DNA-binding protein HEXBP		Q04832
C045R040	5721785	1.90908	2.01967	2.0964	2.00838		DNA-binding protein HEXBP		Q04832
C149R005	5721775	3.17635	1.7694	2.92924	2.625	RNA polymerase I subunit A1	DNA-directed RNA polymerase I subunit RPA1	36617	P91875
C183R086	5721775	3.07894	2.06451	3.22482	2.78942	RNA polymerase I subunit A1	DNA-directed RNA polymerase I subunit RPA1	36617	P91875
C086R057	5735847	2.19117	1.73165	2.26068	2.06117	RNA polymerase III subunit C2	DNA-directed RNA polymerase III subunit RPC2	55703	Q9NW08
C181R109	5735847	2.42845	1.88715	2.38042	2.23201	RNA polymerase III subunit C2	DNA-directed RNA polymerase III subunit RPC2	55703	Q9NW08
C181R098	5727142	2.24101	2.13279	2.28326	2.21902	RNA polymerases I and III subunit AC1	DNA-directed RNA polymerases I and III subunit RPAC1	9533	O15160
C231R108	5727142	2.21995	1.93836	2.31138	2.15656	RNA polymerases I and III subunit AC1	DNA-directed RNA polymerases I and III subunit RPAC1	9533	O15160
C035R143	5725996	1.8714	1.52093	1.82357	1.73863	RNA polymerases I, II, and III subunit ABC2	DNA-directed RNA polymerases I, II, and III subunit RPABC2		Q32PE0
C047R142	5725996	1.86133	1.53025	2.134	1.84186	RNA polymerases I, II, and III subunit ABC2	DNA-directed RNA polymerases I, II, and III subunit RPABC2		Q32PE0
C193R089	5729982	2.52042	2.6048	3.07129	2.73217		DnaJ homolog subfamily C member 9	108671	Q91WN1
C229R077	5732491	1.63251	1.83256	1.61113	1.69207		DUF2373, Uncharacterised conserved protein (DUF2373). This is the C-terminal conserved region of a family of proteins found from fungi to humans. The function is not known.
C096R029	5722830	9.67707	2.3926	12.5669	8.2122		E3 ubiquitin-protein ligase RNF216		P58283
C099R154	5728643	9.58409	2.41585	11.3299	7.77662		E3 ubiquitin-protein ligase RNF216		P58283
C218R139	5728643	8.84369	2.51862	9.13085	6.83105		E3 ubiquitin-protein ligase RNF216		P58283
C235R153	5722830	8.14273	2.41298	9.36699	6.6409		E3 ubiquitin-protein ligase RNF216		P58283
C012R101	5726208	1.79016	1.74657	2.37229	1.96967	Hedls	Enhancer of mRNA-decapping protein 4	23644	Q6P2E9
C106R088	5726208	1.94609	1.55784	2.45827	1.9874	Hedls	Enhancer of mRNA-decapping protein 4	23644	Q6P2E9
C196R169	5731874	3.29753	1.6766	3.55231	2.84215		Enhancer of polycomb homolog 1		Q9H2F5
C218R032	5731874	3.15268	1.74027	3.25028	2.71441		Enhancer of polycomb homolog 1		Q9H2F5
C130R041	5725788	3.1847	2.65987	3.15707	3.00055	EID-3	EP300-interacting inhibitor of differentiation 3		A5LFW4
C173R150	5725788	2.29737	2.27988	2.68435	2.42053	EID-3	EP300-interacting inhibitor of differentiation 3		A5LFW4
C105R073	5732516	16.5347	16.5867	8.76691	13.9628		ER lumen protein retaining receptor	34427	O76767
C266R127	5732516	5.54922	3.13088	2.66126	3.78045		ER lumen protein retaining receptor	34427	O76767
C052R169	5721769	1.82022	1.61353	2.63685	2.02353	Eukaryotic release factor 1	Eukaryotic peptide chain release factor subunit 1	40240	Q9VPH7
C030R035	5732300	1.61356	1.67836	1.9632	1.75171	eIF-2-alpha	Eukaryotic translation initiation factor 2 subunit 1	32617	P41374
C127R159	5732300	1.71706	1.69319	1.76364	1.72463	eIF-2-alpha	Eukaryotic translation initiation factor 2 subunit 1	32617	P41374
C119R091	5722132	2.22147	1.52354	1.85298	1.866	eIF3b	Eukaryotic translation initiation factor 3 subunit B	733052	Q1HDZ5
C254R010	5734766	1.59749	1.60088	1.55449	1.58429	eIF3c	Eukaryotic translation initiation factor 3 subunit C	1278503	Q7PMU8
C022R152	5730111	12.6096	1.55961	22.1133	12.0942	eIF-4E	Eukaryotic translation initiation factor 4E		O77210
C091R036	5730111	49.9528	3.34933	46.192	33.1647	eIF-4E	Eukaryotic translation initiation factor 4E		O77210
C001R082	5735020	2.13128	1.8859	1.78903	1.9354	eIF-6	Eukaryotic translation initiation factor 6	3692	P56537
C027R054	5728805	2.32706	1.8299	2.0594	2.07212	eIF-6	Eukaryotic translation initiation factor 6	3692	P56537
C039R027	5728805	2.40584	1.6742	1.94367	2.00791	eIF-6	Eukaryotic translation initiation factor 6	3692	P56537
C064R126	5735020	2.30137	1.73792	1.87594	1.97174	eIF-6	Eukaryotic translation initiation factor 6	3692	P56537
C108R056	5724551	2.10498	1.55838	1.75948	1.80761	eIF-6	Eukaryotic translation initiation factor 6	3692	P56537
C122R101	5724551	2.40626	1.76307	1.88377	2.0177	eIF-6	Eukaryotic translation initiation factor 6	3692	P56537
C143R030	5732846	1.97195	1.56121	1.87263	1.80193		Exosome complex exonuclease MTR3	326786	Q6P0I8
C146R035	5732846	2.13106	1.86757	1.96789	1.98884		Exosome complex exonuclease MTR3	326786	Q6P0I8
C212R143	5739235	2.39009	1.57104	3.02042	2.32719	Exp1	Exportin-1	103573	Q6P5F9
C141R139	5731817	92.2272	1.62197	243.58	112.477	E-Syt3	Extended synaptotagmin-3	496831	Q5M7N9
C055R076	5740004	2.01478	1.71571	3.57767	2.43605	Protein FACJ	Fanconi anemia group J protein homolog	417642	Q3YK19
C121R090	5740004	1.9332	1.79078	3.34324	2.35574	Protein FACJ	Fanconi anemia group J protein homolog	417642	Q3YK19
C033R165	5731202	1.79724	2.18842	1.91844	1.96803	PPIase	FK506-binding protein 4	2288	Q02790
C052R051	5731202	1.75364	2.03052	2.45768	2.08061	PPIase	FK506-binding protein 4	2288	Q02790
C074R053	5723999	1.80211	2.46519	2.8265	2.3646	PPIase	FK506-binding protein 4	508535	Q9TRY0
C094R112	5723999	1.8423	2.49036	3.04239	2.45835	PPIase	FK506-binding protein 4	508535	Q9TRY0
C048R002	5734461	1.52702	1.82658	1.92756	1.76039	FAP	Glomulin	11146	Q92990
C023R088	5733325	23.8524	1.60855	94.6386	40.0332	GlcN6P deaminase	Glucosamine-6-phosphate isomerase	5578837	Q16HW7
C143R036	5733325	56.4111	2.10734	127.431	61.983	GlcN6P deaminase	Glucosamine-6-phosphate isomerase	5578837	Q16HW7
C266R094	5729252	38.4674	1.73548	106.666	48.9564	GlcN6P deaminase	Glucosamine-6-phosphate isomerase	5578837	Q16HW7
C056R148	5736947	30.0743	1.68204	118.188	49.9816	GlcN6P deaminase 1	Glucosamine-6-phosphate isomerase 1	522919	A4FV08
C077R080	5724289	2.18655	1.80521	2.20396	2.06524		Glutamate-rich WD repeat-containing protein 1	83743	Q9BQ67
C089R076	5728994	1.63572	2.03054	1.81088	1.82571		Glutaredoxin 3	449777	Q5XJ54
C251R108	5728994	1.85984	1.88242	1.79955	1.84727		Glutaredoxin 3	449777	Q5XJ54
C099R047	5737162	1.73012	1.56656	1.88021	1.72563	NMT 1	Glycylpeptide N-tetradecanoyltransferase 1	100174462	Q5RAF3
C193R003	5737162	1.50488	1.57173	1.75218	1.60959	NMT 1	Glycylpeptide N-tetradecanoyltransferase 1	100174462	Q5RAF3
C084R048	5731791	2.12385	1.69166	1.9461	1.92054		Guanine nucleotide-binding protein-like 3 homolog	174329	Q21086
C136R128	5731748	2.00111	1.77786	2.98508	2.25468		H/ACA ribonucleoprotein complex non-core subunit NAF1	35125	Q9VJ62
C102R047	5724656	2.30413	2.19064	2.19368	2.22948		H/ACA ribonucleoprotein complex subunit 2-like protein	44005	Q9V3U2
C256R147	5724656	2.1923	1.97943	1.79785	1.98986		H/ACA ribonucleoprotein complex subunit 2-like protein	44005	Q9V3U2
C060R063	5733021	3.32464	2.45662	4.01772	3.26633		H/ACA ribonucleoprotein complex subunit 4	37873	O44081
C114R056	5724884	3.33072	2.38018	4.06766	3.25952		H/ACA ribonucleoprotein complex subunit 4	37873	O44081
C141R145	5728549	2.72806	2.55699	2.7527	2.67925		H/ACA ribonucleoprotein complex subunit 4	37873	O44081
C184R154	5724884	2.82649	2.1847	3.12382	2.71167		H/ACA ribonucleoprotein complex subunit 4	37873	O44081
C228R012	5733021	2.78827	2.02616	3.48658	2.767		H/ACA ribonucleoprotein complex subunit 4	37873	O44081
C230R105	5728549	2.61306	2.44769	3.19237	2.75104		H/ACA ribonucleoprotein complex subunit 4	37873	O44081
C098R059	5724033	2.23888	1.8279	2.51553	2.1941		Heat shock 70 kDa protein 14	534751	Q2YDD0
C250R106	5724033	2.12062	1.7296	2.50595	2.11872		Heat shock 70 kDa protein 14	534751	Q2YDD0
C067R088	5726479	1.60197	1.56065	1.90184	1.68815		Histone acetyltransferase type B catalytic subunit	8520	O14929
C034R003	5731022	2.17623	2.3029	2.62381	2.36765	RCAF subunit ASF1	Histone chaperone asf1	40141	Q9V464
C198R090	5731022	2.60765	2.57383	2.86833	2.68327	RCAF subunit ASF1	Histone chaperone asf1	40141	Q9V464
C125R078	5722349	2.32008	1.51923	3.1262	2.32184	HD1	Histone deacetylase 1	373961	P56517
C175R035	5722349	2.17218	1.50148	3.33803	2.33723	HD1	Histone deacetylase 1	373961	P56517
C263R074	5728073	7.57304	3.08968	8.04763	6.23678		Histone H2A		P19178
C064R040	5730119	3.44612	2.7256	5.94515	4.03896		Histone H2A sp|P84052.2|H2A_DROER RecName: Full=Histone H2A sp|P84053.2|H2A_DROHY RecName: Full=Histone H2A sp|P84054.2|H2A_DROSI RecName: Full=Histone H2A sp|P84055.2|H2A_DROYA RecName: Full=Histone H2A sp|P84056.2|H2A_RHYAM RecName: Full=Histone H2A sp|P84057.2|H2A_TIGCA RecName: Full=Histone H2A	318855; 3771774; 3771783; 3771785; 3772148; 3772278; 3772282; 3772345; 3772351; 3772360; 3772447; 3772448; 3772505; 3772541; 3772565; 3772618; 3772632	P84051
C166R083	5730119	3.47735	2.59086	4.62898	3.56573		Histone H2A sp|P84052.2|H2A_DROER RecName: Full=Histone H2A sp|P84053.2|H2A_DROHY RecName: Full=Histone H2A sp|P84054.2|H2A_DROSI RecName: Full=Histone H2A sp|P84055.2|H2A_DROYA RecName: Full=Histone H2A sp|P84056.2|H2A_RHYAM RecName: Full=Histone H2A sp|P84057.2|H2A_TIGCA RecName: Full=Histone H2A	318855; 3771774; 3771783; 3771785; 3772148; 3772278; 3772282; 3772345; 3772351; 3772360; 3772447; 3772448; 3772505; 3772541; 3772565; 3772618; 3772632	P84051
C250R040	5733007	8.3493	2.69357	14.8751	8.63933		Histone H2B		P21897
C060R117	5730910	6.66631	1.84411	6.73474	5.08172		Histone RNA hairpin-binding protein	43448	Q9VAN6
C156R051	5730910	6.01863	1.6771	5.86432	4.52002		Histone RNA hairpin-binding protein	43448	Q9VAN6
C001R061	5726159	1.89144	2.32042	1.64898	1.95361	RBBP-4	Histone-binding protein RBBP4	5928	Q09028
C200R028	5735859	2.93625	2.53486	1.71269	2.3946		Histone-lysine N-methyltransferase E(z)	39203	P42124
C202R165	5735859	2.92809	2.24976	1.82942	2.33576		Histone-lysine N-methyltransferase E(z)	39203	P42124
C068R121	5727794	1.80415	1.78429	1.60971	1.73272	WHSC1-like protein 1	Histone-lysine N-methyltransferase NSD3		Q9BZ95
C066R042	5734752	5.87787	1.76046	11.2629	6.30041		Homeobox, Homeobox domain.
C120R015	5732036	8.55446	2.36823	12.3357	7.7528		Homeobox, Homeobox domain.
C173R116	5727215	3.29238	1.92119	4.85171	3.35509		Hyaluronan mediated motility receptor	15366	Q00547
C180R105	5727215	3.1395	1.69349	5.29162	3.37487		Hyaluronan mediated motility receptor	15366	Q00547
C013R105	5730492	2.05209	1.5287	4.72436	2.76838	PTAC97	Importin subunit beta-1	16211	P70168
C111R088	5725474	1.8814	1.53562	2.32654	1.91452	Imp13	Importin-13	424573	Q5ZIC8
C007R115	5735978	2.25	1.55908	3.04488	2.28465	Imp4	Importin-4	79711	Q8TEX9
C014R149	5735978	2.30039	1.62351	3.32816	2.41735	Imp4	Importin-4	79711	Q8TEX9
C075R118	5723273	2.41254	1.59171	4.07095	2.69173	Imp4	Importin-4	79711	Q8TEX9
C198R155	5723273	2.44601	1.61732	3.48059	2.51464	Imp4	Importin-4	79711	Q8TEX9
C085R011	5731629	1.6436	1.93606	2.11994	1.89987	Imp5	Importin-5	70572	Q8BKC5
C189R152	5731629	1.61007	1.62375	1.91955	1.71779	Imp5	Importin-5	70572	Q8BKC5
C128R097	5733045	2.33886	1.73018	4.00096	2.69	XL-INCENP	Inner centromere protein A	398105	O13024
C242R061	5733045	2.72836	1.65186	4.02173	2.80065	XL-INCENP	Inner centromere protein A	398105	O13024
C161R056	5722805	1.78528	1.55492	2.02953	1.78991	Int1	Integrator complex subunit 1	68510	Q6P4S8
C049R118	5730621	1.88765	2.16439	2.82107	2.29104		Kelch domain-containing protein 4	100172995	Q5R8W1
C125R017	5730621	1.84849	1.89785	2.74767	2.16467		Kelch domain-containing protein 4	100172995	Q5R8W1
C009R132	5731969	4.02521	2.12706	10.1155	5.42258		Kinesin-like protein KIF18B	419968	Q5ZLK6
C082R094	5731969	3.86179	1.61801	8.03352	4.50444		Kinesin-like protein KIF18B	419968	Q5ZLK6
C163R108	5731263	4.50117	1.98017	6.99893	4.49342		Kinesin-like protein KIFC1	3833	Q9BW19
C126R023	5731355	5.02255	1.81421	8.73115	5.1893		Kinetochore protein NDC80 homolog		Q4R630
C231R157	5731355	5.34786	2.11222	9.71064	5.72357		Kinetochore protein NDC80 homolog		Q4R630
C208R104	5738742	1.57134	1.55432	1.97667	1.70078		La protein homolog	35305	P40796
C216R158	5738742	1.6525	1.73142	1.89056	1.75816		La protein homolog	35305	P40796
C074R162	5735583	1.53641	1.72049	1.99152	1.74947		La protein homolog	35305	P40796
C086R068	5723130	1.63613	1.80961	2.46183	1.96919		La protein homolog		Q26457
C156R046	5722982	1.55642	2.09637	1.55233	1.73504		Laps, Learning-associated protein. This is a family of 121-amino acid secretory proteins. Laps functions in the regulation of neuronal cell adhesion and/or movement and synapse attachment. Laps binds to the ApC/EBP (Aplysia CCAAT/enhancer binding protein) promoter and activates the transcription of ApC/EBP mRNA.
C164R088	5733441	1.52381	1.65142	1.68671	1.62064		Ligatin	511844	Q58CR3
C099R127	5734954	1.5338	1.75086	2.04307	1.77591	LONP	Lon protease homolog, mitochondrial	510796	Q59HJ6
C021R041	5722970	2.21528	1.89652	2.96453	2.35878	Lola-like protein	Longitudinals lacking protein-like	44703	Q7KRI2
C080R130	5729999	1.73229	2.06175	1.82291	1.87232	Lola-like protein	Longitudinals lacking protein-like	44703	Q7KRI2
C232R015	5727162	1.70571	2.18754	1.50568	1.79964		Lysine-specific histone demethylase 1	99982	Q6ZQ88
C238R073	5727162	1.5016	1.97618	1.55219	1.67666		Lysine-specific histone demethylase 1	99982	Q6ZQ88
C178R059	5731193	3.63615	1.81088	9.76159	5.06954		MAP65_ASE1, Microtubule associated protein (MAP65/ASE1 family).
C197R054	5732095	1.80424	1.61081	1.53791	1.65099		Mariner Mos1 transposase		Q7JQ07
C034R052	5729410	1.99111	1.5366	2.05956	1.86242		Mediator of RNA polymerase II transcription subunit 29	1281934	Q7PUD7
C158R016	5732113	1.52141	1.51758	1.65321	1.56407		Mediator of RNA polymerase II transcription subunit 31-B	443919	Q6GQA1
C069R041	5723488	1.61163	1.83451	2.10965	1.85193	BAP-1	Membrane-associated guanylate kinase, WW and PDZ domain-containing protein 1	14924	Q6RHR9
C199R003	5723488	1.56323	1.67634	2.17015	1.80324	BAP-1	Membrane-associated guanylate kinase, WW and PDZ domain-containing protein 1	14924	Q6RHR9
C188R069	5722130	1.95401	1.63271	2.24173	1.94282		Metastasis-associated protein MTA1		Q8K4B0
C226R023	5722130	1.86375	1.53816	2.02674	1.80955		Metastasis-associated protein MTA1		Q8K4B0
C147R039	5723337	1.97577	2.18762	1.84266	2.00202	MetAP 1	Methionine aminopeptidase 1	503783	Q4QRK0
C136R120	5725106	1.65916	1.76166	1.56851	1.66311		Midasin	23195	Q9NU22
C006R056	5728647	1.70904	1.50056	1.53088	1.58016		Mitochondrial import inner membrane translocase subunit Tim10	37478	Q9W2D6
C025R022	5721974	2.13201	1.84052	3.02235	2.33163	dtom40	Mitochondrial import receptor subunit TOM40 homolog 1	44978	Q9U4L6
C029R020	5721974	2.1535	1.96472	2.41511	2.17778	dtom40	Mitochondrial import receptor subunit TOM40 homolog 1	44978	Q9U4L6
C035R131	5730322	1.6766	1.6372	1.90104	1.73828	Mitochondrial RNase P protein 1	Mitochondrial ribonuclease P protein 1 homolog	37124	Q7JUX9
C043R110	5725240	2.89033	2.57553	2.32106	2.59564		Mitotic checkpoint protein BUB3	9184	O43684
C124R118	5725240	2.54128	1.95728	2.27264	2.25706		Mitotic checkpoint protein BUB3	9184	O43684
C111R059	5724164	1.69739	2.8584	1.52666	2.02748		MKI67 FHA domain-interacting nucleolar phosphoprotein-like	448106	Q6GL69
C137R076	5724251	1.74587	1.88795	6.64398	3.42594	MGL	Monoglyceride lipase	11343	Q99685
C170R093	5724251	1.59846	1.75163	7.88169	3.74393	MGL	Monoglyceride lipase	11343	Q99685
C116R108	5729542	1.81691	1.61172	1.80172	1.74345		Monothiol glutaredoxin-S11	4349034	Q0IWL9
C197R159	5732049	1.59948	1.80267	1.72169	1.70795	AtGrxS17	Monothiol glutaredoxin-S17	825835	Q9ZPH2
C178R073	5732415	1.62195	1.93437	2.98074	2.17902		Mortality factor 4-like protein 1	300891	Q6AYU1
C067R102	5730653	1.61531	1.54883	1.73036	1.6315		mRNA export factor		Q4R6D2
C109R108	5736089	2.12608	2.31566	1.67839	2.04005		mRNA turnover protein 4 homolog	2539913	Q9USZ6
C191R025	5736089	2.10789	2.2917	1.74437	2.04799		mRNA turnover protein 4 homolog	2539913	Q9USZ6
C263R126	5728289	2.03797	2.26225	1.59248	1.96424		mRNA turnover protein 4 homolog	69902	Q9D0I8
C035R042	5730173	7.55149	1.87994	21.7603	10.3972		Myophilin		Q24799
C207R162	5730173	8.44683	1.96032	26.1884	12.1985		Myophilin		Q24799
C142R140	5726857	2.33011	2.60622	1.90995	2.28209		N-acetyltransferase 10	98956	Q8K224
C249R032	5726857	2.38838	2.6519	1.91474	2.31834		N-acetyltransferase 10	98956	Q8K224
C036R162	5724899	2.67118	1.56693	2.7882	2.3421		N(6)-adenine-specific DNA methyltransferase 1		Q9Y5N5
C249R143	5724899	2.57878	1.60967	2.75697	2.31514		N(6)-adenine-specific DNA methyltransferase 1		Q9Y5N5
C151R031	5725189	2.65267	1.7466	2.89438	2.43122		N(6)-adenine-specific DNA methyltransferase 1		Q9Y5N5
C077R069	5731427	1.85735	1.87122	2.59287	2.10715		Negative elongation factor E	38982	P92204
C103R158	5734743	1.89723	1.84675	1.55655	1.76684		Neuroguidin	395016	Q28IV8
C123R095	5730843	1.93249	1.98446	1.57085	1.82927		Neuroguidin-B		Q5M985
C001R103	5729991	1.95128	1.66847	1.51466	1.71147	NARG1-like protein	NMDA receptor-regulated 1-like protein	79612	Q6N069
C015R090	5731864	3.91507	3.81826	6.1605	4.63128	NASP	Nuclear autoantigenic sperm protein	298441	Q66HD3
C053R061	5731864	5.50673	4.59029	9.95979	6.68561	NASP	Nuclear autoantigenic sperm protein	298441	Q66HD3
C073R088	5729054	3.30011	2.6545	4.45598	3.4702	NASP	Nuclear autoantigenic sperm protein	298441	Q66HD3
C106R072	5731952	9.83179	2.32293	36.6496	16.2681		Nuclear distribution protein nudE-like 1-A	394244	Q7SXI6
C120R068	5725577	2.15485	1.8059	1.72457	1.8951		Nuclear pore complex protein Nup107	57122	P57740
C217R090	5725577	2.25221	1.85156	1.6898	1.93119		Nuclear pore complex protein Nup107	57122	P57740
C244R103	5736010	2.18608	2.31866	1.58258	2.02911		Nuclear pore complex protein Nup133	55746	Q8WUM0
C031R085	5727752	1.85663	1.80727	2.03618	1.90003		Nuclear pore complex protein Nup93	30172	Q7ZU29
C108R096	5727752	1.99646	1.82592	2.1672	1.99653		Nuclear pore complex protein Nup93	30172	Q7ZU29
C190R115	5729165	2.271	2.24246	2.21807	2.24384		Nuclear pore glycoprotein p62	23636	P37198
C194R143	5729165	2.27101	2.24485	2.24794	2.2546		Nuclear pore glycoprotein p62	23636	P37198
C032R164	5731654	1.71369	1.50392	2.26988	1.82916	NF-YC	Nuclear transcription factor Y subunit gamma	18046	P70353
C061R111	5722665	1.97751	1.86822	1.5773	1.80768	Protein NOC2 homolog	Nucleolar complex protein 2 homolog	508638	Q3SYU1
C007R086	5725566	1.98797	1.675	2.01237	1.89178	NOC3 protein homolog	Nucleolar complex protein 3 homolog	100174525	Q5R952
C189R146	5726560	2.68435	2.59925	1.96463	2.41608	Nopp140	Nucleolar phosphoprotein p130	9221	Q14978
C249R145	5726560	2.59349	2.58198	1.62956	2.26834	Nopp140	Nucleolar phosphoprotein p130	9221	Q14978
C163R029	5729767	2.49469	1.98317	1.73706	2.07164	Protein URB1	Nucleolar pre-ribosomal-associated protein 1	207932	Q571H0
C006R083	5735365	1.84072	2.27862	2.09048	2.06994		Nucleolar protein 56	67134	Q9D6Z1
C011R119	5729604	1.83993	1.91733	1.82479	1.86068		Nucleolar protein 56		Q95K50
C117R132	5729604	1.63725	2.62636	1.64372	1.96911		Nucleolar protein 56		Q95K50
C124R053	5736140	1.90172	2.48351	2.05098	2.1454		Nucleolar protein 56	67134	Q9D6Z1
C143R005	5736140	1.68983	2.15864	1.92006	1.92284		Nucleolar protein 56	67134	Q9D6Z1
C186R031	5735365	1.78804	2.44248	2.09559	2.1087		Nucleolar protein 56	67134	Q9D6Z1
C057R099	5732541	2.31371	2.03852	2.06686	2.13969		Nucleolar protein 58		Q4R779
C113R127	5737818	2.50022	2.75739	2.6918	2.6498		Nucleolar protein 58		Q4R779
C159R169	5732541	2.58061	2.0445	2.37369	2.33293		Nucleolar protein 58		Q4R779
C219R129	5737818	2.4769	2.76641	2.98211	2.74181		Nucleolar protein 58		Q4R779
C032R069	5734396	2.02025	1.81045	1.67016	1.83362		Nucleoporin NDC1	335236	Q7SZC5
C158R105	5734396	1.92999	1.75819	1.78076	1.82298		Nucleoporin NDC1	335236	Q7SZC5
C022R141	5729053	1.65087	1.84357	1.52797	1.67414	hNup188	Nucleoporin NUP188 homolog	23511	Q5SRE5
C223R145	5729126	2.05042	2.10773	2.01932	2.05915	p37	Nucleoporin Nup37	79023	Q8NFH4
C258R027	5729126	1.97621	2.03248	1.97132	1.99334	p37	Nucleoporin Nup37	79023	Q8NFH4
C126R143	5723911	1.78975	1.82228	2.27147	1.96117		Nucleoporin Nup43	348995	Q8NFH3
C186R044	5723911	1.84764	1.57161	2.05066	1.8233		Nucleoporin Nup43	348995	Q8NFH3
C208R111	5730824	1.78616	2.0553	1.90387	1.91511		Nucleoporin p58/p45	71844	Q8R332
C247R088	5730824	1.65728	1.64433	1.77762	1.69308		Nucleoporin p58/p45	71844	Q8R332
C121R132	5724210	3.69316	1.88095	5.4309	3.66834		Origin recognition complex subunit 2	4999	Q13416
C141R127	5730469	7.02244	2.61004	5.49329	5.04192	UMP synthase	Orotidine 5-phosphate decarboxylase	100173867	Q5R514
C197R138	5730469	7.00883	2.91037	5.68469	5.2013	UMP synthase	Orotidine 5-phosphate decarboxylase	100173867	Q5R514
C086R143	5726905	1.98912	1.6487	1.79098	1.8096		PCI domain-containing protein 2		Q5JVF3
C023R110	5739301	1.55255	1.6947	3.07586	2.10771	DmTPx-1	Peroxiredoxin 1	53578	Q9V3P0
C019R159	5723476	1.73115	2.40765	1.93647	2.02509		Pescadillo homolog	6570125	B4JZG8
C044R134	5723476	1.61098	2.56818	1.64016	1.93977		Pescadillo homolog	6570125	B4JZG8
C085R094	5723704	1.95402	1.52642	1.54104	1.67383	PLD 6	Phospholipase D6	194908	Q5SWZ9
C216R133	5724093	1.58631	1.58069	1.51543	1.56081		Phosphorylated CTD-interacting factor 1	63935	Q9H4Z3
C046R062	5736782	1.74067	2.19348	1.75663	1.89692		PITSLRE serine/threonine-protein kinase CDC2L2		Q9UQ88
C080R106	5736782	1.85374	2.30473	2.01234	2.05694		PITSLRE serine/threonine-protein kinase CDC2L2		Q9UQ88
C090R161	5727880	6.31544	2.86011	8.30556	5.82704		Piwi-like protein 1	9271	Q96J94
C138R055	5727880	5.93983	2.61082	8.01809	5.52291		Piwi-like protein 1	9271	Q96J94
C113R138	5729896	1.53509	1.65132	2.29645	1.82762		Pleiotropic regulator 1	533951	Q2KID6
C041R153	5730433	2.01791	1.57078	3.06628	2.21832	PAP-gamma	Poly(A) polymerase gamma	216578	Q6PCL9
C103R167	5730433	1.74861	1.56226	2.89971	2.07019	PAP-gamma	Poly(A) polymerase gamma	216578	Q6PCL9
C084R010	5725646	2.23669	1.79265	3.57883	2.53605		Pre-mRNA 3-end-processing factor FIP1	100172699	Q5RAA7
C150R141	5735246	2.59886	1.83526	2.50503	2.31305		Pre-mRNA-processing factor 19	28000	Q99KP6
C184R030	5722897	2.33779	2.34601	2.45039	2.37806		Pre-mRNA-processing factor 19	28000	Q99KP6
C197R008	5735246	2.05638	1.57118	2.21875	1.94877		Pre-mRNA-processing factor 19	28000	Q99KP6
C258R013	5722897	2.41315	2.14154	1.96279	2.17249		Pre-mRNA-processing factor 19	28000	Q99KP6
C066R016	5730475	1.7072	1.63985	2.24088	1.86265		Pre-mRNA-splicing factor CWC22 homolog	57703	Q9HCG8
C098R036	5731646	1.54668	1.66294	1.71504	1.64155		Pre-mRNA-splicing factor ISY1 homolog	362394	Q6AYB3
C140R050	5731646	1.56599	1.53142	1.81039	1.63593		Pre-mRNA-splicing factor ISY1 homolog	362394	Q6AYB3
C041R137	5731650	1.74549	1.83104	2.43405	2.00353		Pre-mRNA-splicing regulator female-lethal(2)D	36527	Q9Y091
C217R049	5722693	2.12585	1.75071	1.81812	1.89823		Pre-rRNA-processing protein TSR1 homolog	495115	Q5XGY1
C261R106	5735452	2.28421	1.72523	1.53962	1.84969		Pre-rRNA-processing protein TSR1 homolog	55720	Q2NL82
C266R125	5722692	2.1183	1.69389	1.65589	1.82269		Pre-rRNA-processing protein TSR1 homolog	104662	Q5SWD9
C071R024	5739324	5.75935	1.88825	7.43761	5.0284		Probable ATP-dependent RNA helicase DDX11	320209	Q6AXC6
C086R160	5739324	6.24957	2.44911	7.35968	5.35279		Probable ATP-dependent RNA helicase DDX11	320209	Q6AXC6
C020R056	5725451	1.74647	2.2181	2.08677	2.01711		Probable ATP-dependent RNA helicase DDX47	67755	Q9CWX9
C250R104	5725451	1.86043	2.0822	2.00753	1.98339		Probable ATP-dependent RNA helicase DDX47	67755	Q9CWX9
C105R126	5738953	1.87173	2.68211	1.86636	2.14007		Probable ATP-dependent RNA helicase DDX56	54606	Q9NY93
C205R153	5738953	1.72445	2.46131	1.61617	1.93398		Probable ATP-dependent RNA helicase DDX56	54606	Q9NY93
C029R093	5732831	1.68887	1.91656	1.70058	1.76867		Probable ATP-dependent RNA helicase DDX56	508728	Q3SZ40
C121R071	5722165	2.16665	1.58592	2.25121	2.00126		Probable ATP-dependent RNA helicase kurz	31205	O46072
C179R149	5722518	1.68571	2.08684	1.89595	1.8895		Probable ATP-dependent RNA helicase pitchoune	42595	Q9VD51
C179R165	5731653	1.57574	2.08556	1.64465	1.76865		Probable ATP-dependent RNA helicase pitchoune	42595	Q9VD51
C192R130	5722518	1.58373	2.21118	1.78972	1.86154		Probable ATP-dependent RNA helicase pitchoune	42595	Q9VD51
C226R011	5731653	1.70547	2.05423	1.79238	1.85069		Probable ATP-dependent RNA helicase pitchoune	42595	Q9VD51
C078R002	5736715	1.60542	2.06583	1.61618	1.76248		Probable ATP-dependent RNA helicase pitchoune	42595	Q9VD51
C121R010	5727702	2.99271	1.52118	3.61531	2.70973		Probable dimethyladenosine transferase	27292	Q9UNQ2
C062R007	5723375	2.34334	1.76762	3.52339	2.54478	HD1	Probable histone deacetylase 1-B		O42227
C128R083	5726906	2.21349	1.8992	3.33432	2.48234	TRP-185	Probable methyltransferase TARBP1	6894	Q13395
C149R102	5726906	2.40431	1.71849	3.14806	2.42362	TRP-185	Probable methyltransferase TARBP1	6894	Q13395
C027R034	5731107	1.60126	1.89333	1.60883	1.70114	ProRS	Probable prolyl-tRNA synthetase, mitochondrial	25973	Q7L3T8
C004R090	5730979	1.83833	1.72763	2.27898	1.94832		Probable protein phosphatase CG10417	35492	Q7K4Q5
C070R019	5739935	1.68068	1.60065	2.01399	1.76511		Probable protein phosphatase CG10417	35492	Q7K4Q5
C246R012	5722179	2.34118	1.86195	1.7796	1.99424		Probable ribosome biogenesis protein NEP1	31387	Q9W4J5
C076R150	5729517	2.00219	1.68987	1.84561	1.84589		Probable RNA-binding protein 19	9904	Q9Y4C8
C178R099	5726504	1.72644	2.18944	1.67949	1.86512		Probable rRNA-processing protein EBP2 homolog	43691	Q9V9Z9
C198R042	5726504	1.57831	2.51418	1.77523	1.95591		Probable rRNA-processing protein EBP2 homolog	43691	Q9V9Z9
C171R071	5731413	2.26596	2.09422	2.62132	2.32716	Sm-D1	Probable small nuclear ribonucleoprotein Sm D1	44668	Q9VU02
C213R085	5731413	2.1836	2.00954	2.3601	2.18442	Sm-D1	Probable small nuclear ribonucleoprotein Sm D1	44668	Q9VU02
C015R028	5724450	1.97149	1.82062	1.53414	1.77542		Prohibitin-2	515363	Q2HJ97
C232R086	5724450	9.57345	9.66838	1.91755	7.05313		Prohibitin-2	515363	Q2HJ97
C093R003	5722577	2.09176	1.74132	2.5661	2.13306	PCNA	Proliferating cell nuclear antigen		O16852
C197R048	5722577	2.31868	1.61257	3.09346	2.34157	PCNA	Proliferating cell nuclear antigen		O16852
C131R107	5731415	2.25149	1.81178	2.42753	2.1636	PCNA	Proliferating cell nuclear antigen		O16852
C011R073	5729081	1.94025	1.7215	1.899	1.85358	hG4-1	Proliferation-associated protein 2G4	5036	Q9UQ80
C133R004	5729226	4.76817	3.32635	1.62674	3.24042		Proteasome subunit beta type-2	516919	Q5E9K0
C077R140	5732040	1.7562	1.81256	2.06147	1.87674		Protein AATF	417653	Q5ZIM6
C150R036	5732040	1.83713	1.67276	2.42466	1.97818		Protein AATF	417653	Q5ZIM6
C080R151	5729689	2.01394	1.80333	2.03593	1.95107		Protein arginine N-methyltransferase 1		Q99873
C132R135	5729689	2.08748	1.72277	2.49051	2.10026		Protein arginine N-methyltransferase 1		Q99873
C102R001	5726250	1.96658	1.70057	2.40534	2.02416		Protein arginine N-methyltransferase 1		Q99873
C018R121	5738145	1.72593	2.06434	1.69871	1.82966	SKB1 homolog	Protein arginine N-methyltransferase 5	27374	Q8CIG8
C066R046	5738145	1.74469	2.15926	1.94537	1.94977	SKB1 homolog	Protein arginine N-methyltransferase 5	27374	Q8CIG8
C055R102	5721949	2.07359	1.55607	1.59462	1.74143		Protein FAM136A	494828	Q63ZH8
C062R061	5729781	1.79815	1.81502	2.40566	2.00628		Protein LAS1 homolog	76130	A2BE28
C211R071	5729781	1.78375	1.89992	2.14395	1.94254		Protein LAS1 homolog	76130	A2BE28
C020R022	5732664	8.51022	2.62951	12.9346	8.02478		Protein LSM14 homolog A	100173930	Q5R4R4
C053R037	5722916	7.80515	2.27176	9.09047	6.38913		Protein LSM14 homolog B	149986	Q9BX40
C182R159	5731825	1.75842	1.83647	1.51816	1.70435		Protein RRP5 homolog		Q6NS46
C231R094	5729483	1.88416	2.11793	1.73188	1.91132		Protein rtcB	947929	P46850
C126R138	5732763	1.5193	2.29454	1.73661	1.85015		Protein SDA1 homolog	286746	Q6NV26
C233R014	5732549	2.31197	1.62697	4.15987	2.6996		Protein SHQ1 homolog	780072	Q05B18
C205R169	5734727	1.65227	1.66033	1.64574	1.65278		Protein TRI1	855273	Q05024
C048R161	5733331	1.75695	1.64536	1.69461	1.69897	HLA-HA8	Pumilio domain-containing protein KIAA0020		Q15397
C143R128	5733331	1.76388	1.65743	2.01072	1.81067	HLA-HA8	Pumilio domain-containing protein KIAA0020		Q15397
C163R099	5728680	1.78471	1.77788	2.24456	1.93572		Putative oxidoreductase GLYR1 homolog	1279367	Q7Q161
C235R130	5730657	2.15889	1.60972	2.98216	2.25026		Putative pre-mRNA-splicing factor ATP-dependent RNA helicase DHX15	100174435	Q5RAZ4
C048R062	5730937	2.15196	2.77306	1.63825	2.18775		Putative rRNA methyltransferase 3	303608	Q5RJT2
C127R165	5730937	2.25067	2.43666	1.66814	2.11849		Putative rRNA methyltransferase 3	303608	Q5RJT2
C256R089	5735213	1.9642	1.53326	1.77864	1.7587		Pyridine nucleotide-disulfide oxidoreductase domain-containing protein 1	79912	Q8WU10
C004R033	5733094	101.181	2.91628	116.454	73.5171		Quinone oxidoreductase		P11415
C162R129	5733094	62.2445	2.10503	81.7064	48.6853		Quinone oxidoreductase		P11415
C159R086	5723319	1.54945	1.59109	2.29795	1.81283		Rab GTPase-binding effector protein 1	9135	Q15276
C140R078	5731717	1.64709	1.62166	2.16144	1.81006	MgcRacGAP	Rac GTPase-activating protein 1	29127	Q9H0H5
C160R086	5731673	11.7426	1.66156	72.0576	28.4873		Ras-related protein Rab-32	10981	Q13637
C094R166	5726991	2.16415	3.15338	1.76661	2.36138		Regulator of chromosome condensation		P23800
C133R076	5726991	2.54325	2.01299	2.95486	2.5037		Regulator of chromosome condensation		P23800
C152R024	5732753	2.35088	2.68691	2.79918	2.61232		Regulator of chromosome condensation		P23800
C070R091	5727489	2.08894	1.98354	3.98999	2.68749	RF-C 38 kDa subunit	Replication factor C subunit 3	69263	Q8R323
C115R106	5739265	1.82036	1.73744	3.28701	2.28161	RF-C 36 kDa subunit	Replication factor C subunit 5	5985	P40937
C220R148	5739265	1.79309	1.57274	3.259	2.20828	RF-C 36 kDa subunit	Replication factor C subunit 5	5985	P40937
C122R064	5726101	2.79438	2.13501	1.88625	2.27188	RP-A p70	Replication protein A 70 kDa DNA-binding subunit	68275	Q8VEE4
C192R123	5726101	2.51335	2.2172	1.62921	2.11992	RP-A p70	Replication protein A 70 kDa DNA-binding subunit	68275	Q8VEE4
C119R068	5736753	6.74664	2.01563	21.0982	9.95348		Rhotekin-2	219790	Q8IZC4
C054R140	5731086	2.73413	2.38562	2.83221	2.65065	RNase H2 subunit B	Ribonuclease H2 subunit B	79621	Q5TBB1
C257R099	5731086	2.37249	2.09372	3.16733	2.54451	RNase H2 subunit B	Ribonuclease H2 subunit B	79621	Q5TBB1
C251R118	5726774	1.68694	2.18706	1.59214	1.82205		Ribosomal L1 domain-containing protein 1		A4FV97
C084R074	5723776	2.96745	2.1596	2.40383	2.51029		Ribosome biogenesis protein WDR12 homolog	5565845	Q17BB0
C197R109	5723776	3.00958	2.16075	3.46562	2.87865		Ribosome biogenesis protein WDR12 homolog	5565845	Q17BB0
C139R111	5733505	1.56686	1.58585	2.05253	1.73508		Ribosome biogenesis regulatory protein homolog	297784	A1A5P2
C157R017	5733505	1.64859	1.72492	2.40859	1.92737		Ribosome biogenesis regulatory protein homolog	297784	A1A5P2
C183R106	5732980	1.88464	1.58964	1.84062	1.77163		Ribosome production factor 1	379964	Q8AVP1
C247R100	5727430	1.76633	1.54835	1.85401	1.7229		Ribosome production factor 1	379964	Q8AVP1
C054R156	5731818	2.57232	1.75496	5.66044	3.32924		RING finger protein 220	55182	Q5VTB9
C084R039	5731818	2.55328	1.75286	6.66316	3.65643		RING finger protein 220	55182	Q5VTB9
C029R026	5727813	2.96414	1.50199	4.00391	2.82335		RNA (guanine-9-)-methyltransferase domain-containing protein 2	493374	Q66JJ4
C023R011	5731272	1.57637	1.61833	1.97103	1.72191		RNA methyltransferase-like protein 1	67390	Q5ND52
C169R031	5731272	1.67068	1.79065	2.22235	1.89456		RNA methyltransferase-like protein 1	67390	Q5ND52
C053R073	5726292	1.78447	1.79601	1.9841	1.85486		RNA-binding protein 28	55131	Q9NW13
C181R140	5726292	1.80454	1.64072	1.7475	1.73092		RNA-binding protein 28	55131	Q9NW13
C096R037	5722423	1.79307	1.57339	2.06958	1.81201		RNA-binding protein 34	23029	P42696
C075R119	5733498	1.9544	1.81912	1.85588	1.87647		RNA-binding protein pno1	5518945	A7RP64
C147R163	5733498	2.00855	1.73139	1.96089	1.90028		RNA-binding protein pno1	5518945	A7RP64
C121R119	5729332	2.03801	1.64322	2.90825	2.19649		Rod_C, Rough deal protein C-terminal region. Rod, the Rough deal protein, displays a dynamic intracellular staining pattern, localising first to kinetochores in pro-metaphase, but moving to kinetochore microtubules at metaphase. Early in anaphase the protein is once again restricted to the kinetochores, where it persists until the end of telophase. This behaviour is in all respects similar to tha…
C173R115	5730470	2.86194	1.87295	3.06219	2.59903		rRNA 2-O-methyltransferase fibrillarin	6547316	Q8I1F4
C211R040	5730470	2.96554	1.76683	3.63638	2.78958		rRNA 2-O-methyltransferase fibrillarin	6547316	Q8I1F4
C209R063	5722909	1.88555	1.93322	1.96928	1.92935		RuvB-like 2		Q9DE27
C024R026	5739260	4.79495	2.14405	6.84666	4.59522		S-phase kinase-associated protein 2	6502	Q13309
C238R097	5739260	4.36191	2.10157	6.62031	4.36127		S-phase kinase-associated protein 2	6502	Q13309
C167R141	5725836	36.2078	2.07951	89.0812	42.4562		Serine proteinase stubble catalytic chain	41958	Q05319
C168R049	5725836	39.6495	2.0065	74.333	38.663		Serine proteinase stubble catalytic chain	41958	Q05319
C052R011	5730911	2.55596	1.74728	3.86911	2.72411	Aurora-A	Serine/threonine-protein kinase 6	397925	Q91820
C078R096	5735774	1.78248	1.68944	2.35661	1.94285		Serine/threonine-protein kinase PRP4 homolog	512236	Q08DZ2
C214R077	5735774	2.07571	1.77741	2.31057	2.05456		Serine/threonine-protein kinase PRP4 homolog	512236	Q08DZ2
C184R016	5728093	2.09179	1.81464	2.10998	2.00547		Serine/threonine-protein kinase PRP4 homolog	512236	Q08DZ2
C203R015	5732462	1.83668	1.6437	2.14366	1.87468	RIO kinase 2	Serine/threonine-protein kinase RIO2	55781	Q9BVS4
C216R043	5732462	1.8381	1.67883	2.28029	1.93241	RIO kinase 2	Serine/threonine-protein kinase RIO2	55781	Q9BVS4
C088R059	5724290	1.95674	1.69862	1.75699	1.80412		Sjoegren syndrome/scleroderma autoantigen 1 homolog	56390	P56873
C238R068	5724290	1.85836	1.74792	1.64515	1.75048		Sjoegren syndrome/scleroderma autoantigen 1 homolog	56390	P56873
C053R015	5722952	2.31754	2.12528	1.87281	2.10521	snRNP-E	Small nuclear ribonucleoprotein E	393979	Q7ZUG0
C262R030	5722952	2.32292	2.20657	1.78947	2.10632	snRNP-E	Small nuclear ribonucleoprotein E	393979	Q7ZUG0
C030R011	5732044	1.90233	1.69438	1.50887	1.70186	Sm-D3	Small nuclear ribonucleoprotein Sm D3	6634	P62318
C118R045	5732044	2.09242	1.8003	2.24111	2.04461	Sm-D3	Small nuclear ribonucleoprotein Sm D3	6634	P62318
C110R129	5726090	1.79959	2.06919	1.9114	1.92673	SUMO	Small ubiquitin-related modifier	266820	P55853
C111R062	5726090	1.78736	2.05843	1.69401	1.8466	SUMO	Small ubiquitin-related modifier	266820	P55853
C067R120	5729871	6.04587	1.70174	8.99666	5.58142		Snurportin-1	515588	Q2TBK8
C085R157	5729871	6.1885	1.61215	8.25106	5.35057		Snurportin-1	515588	Q2TBK8
C088R127	5732266	6.39823	1.87809	12.0497	6.77532		Snurportin-1	515588	Q2TBK8
C125R145	5738960	2.81226	1.96427	2.91769	2.56474	rOCT2	Solute carrier family 22 member 2	29503	Q9R0W2
C146R026	5721988	1.88865	1.73718	1.97268	1.86617		Something about silencing protein 10	305258	Q6AXX4
C020R127	5722785	1.70598	1.82909	1.90847	1.81451	SAP 61	Splicing factor 3A subunit 3	10946	Q12874
C062R033	5722785	1.74335	2.00664	1.88044	1.87681	SAP 61	Splicing factor 3A subunit 3	10946	Q12874
C135R081	5738984	1.58196	1.72118	1.72795	1.67703	SAP 61	Splicing factor 3A subunit 3	75062	Q9D554
C134R163	5731674	1.84933	2.23804	1.9365	2.00796		Splicing factor 3B subunit 3	406824	Q1LVE8
C262R067	5731674	1.86396	2.17811	1.59016	1.87741		Splicing factor 3B subunit 3	406824	Q1LVE8
C137R068	5723115	1.55158	2.12868	2.04029	1.90685	PBP74	Stress-70 protein, mitochondrial	291671	P48721
C164R050	5723115	1.54272	2.20052	1.87499	1.87275	PBP74	Stress-70 protein, mitochondrial	291671	P48721
C142R042	5730214	1.53126	1.90759	1.89478	1.77788	PBP74	Stress-70 protein, mitochondrial	15526	P38647
C023R105	5727284	1.56145	1.81452	2.06871	1.81489	STI1	Stress-induced-phosphoprotein 1	10963	P31948
C207R116	5727284	1.50629	1.87506	2.23185	1.87107	STI1	Stress-induced-phosphoprotein 1	10963	P31948
C180R138	5726059	1.81956	1.86298	3.75916	2.48057	mSMC5	Structural maintenance of chromosomes protein 5	226026	Q8CG46
C024R049	5729606	1.54698	1.51457	1.70595	1.58917		Sulfurtransferase MOCS3	5565143	Q17CA7
C217R114	5729415	1.5414	1.96198	1.52949	1.67763		SUMO-activating enzyme subunit 1	443558	Q8JGT5
C050R001	5733136	1.56748	1.51677	2.17233	1.75219		Surfeit locus protein 6 homolog	42370	Q9VDS6
C091R038	5724230	1.6581	1.95666	1.69858	1.77111		SWI/SNF complex subunit SMARCC2	68094	Q6PDG5
C011R019	5722286	1.66102	1.65245	1.53137	1.61495		Symplekin	8189	Q92797
C245R088	5722286	1.63787	1.67312	1.5236	1.61153		Symplekin	8189	Q92797
C213R139	5732605	1.59912	1.61049	1.91041	1.70667	TCP-1-alpha	T-complex protein 1 subunit alpha	42649	P12613
C229R066	5731447	1.6016	1.56205	1.88584	1.68317	TCP-1-alpha	T-complex protein 1 subunit alpha	42649	P12613
C010R138	5732586	2.13122	1.5694	1.69257	1.79773	TCP-1-beta	T-complex protein 1 subunit beta	505313	Q3ZBH0
C259R014	5730764	2.12919	1.76311	1.58043	1.82424	TCP-1-beta	T-complex protein 1 subunit beta	10576	P78371
C065R079	5731311	2.19704	1.90087	2.0496	2.04917	TCP-1-delta	T-complex protein 1 subunit delta		Q9NB32
C075R155	5730446	2.13436	1.61598	1.9917	1.91401	TCP-1-delta	T-complex protein 1 subunit delta		Q9NB32
C161R169	5725695	2.18594	1.80928	2.15389	2.0497	TCP-1-delta	T-complex protein 1 subunit delta		Q9NB32
C178R137	5725695	2.07203	1.78629	1.52349	1.79393	TCP-1-delta	T-complex protein 1 subunit delta		Q9NB32
C197R144	5730446	2.09265	1.85247	2.04148	1.99553	TCP-1-delta	T-complex protein 1 subunit delta		Q9NB32
C198R114	5731311	2.11262	1.94166	1.73957	1.93129	TCP-1-delta	T-complex protein 1 subunit delta		Q9NB32
C104R157	5735590	1.8035	1.74167	1.54059	1.69525	TCP-1-epsilon	T-complex protein 1 subunit epsilon	22948	P48643
C170R116	5729844	1.84751	1.66894	1.82122	1.77922	TCP-1-epsilon	T-complex protein 1 subunit epsilon	22948	P48643
C213R160	5726662	1.96863	1.80408	1.71018	1.82763	TCP-1-eta	T-complex protein 1 subunit eta	428806	Q5ZJK8
C135R046	5734248	2.3726	1.68371	2.08318	2.0465	TCP-1-zeta	T-complex protein 1 subunit zeta	417541	Q5ZJ54
C171R107	5734248	2.20597	1.69057	1.55393	1.81682	TCP-1-zeta	T-complex protein 1 subunit zeta	417541	Q5ZJ54
C159R123	5722700	2.40328	1.74768	1.92407	2.02501	TCP-1-zeta	T-complex protein 1 subunit zeta	12466	P80317
C227R135	5722551	2.2235	1.51318	1.9718	1.90282	TCP-1-zeta	T-complex protein 1 subunit zeta	100008688	O77622
C252R075	5733470	2.21247	1.7799	1.8565	1.94962	TCP-1-zeta	T-complex protein 1 subunit zeta	12466	P80317
C266R054	5728878	2.22039	1.58123	1.87464	1.89208	TCP-1-zeta	T-complex protein 1 subunit zeta	100008688	O77622
C143R100	5725525	2.19033	2.08365	2.17717	2.15038	p100	Targeting protein for Xklp2	22974	Q9ULW0
C207R085	5725525	2.76423	2.36148	2.52842	2.55137	p100	Targeting protein for Xklp2	22974	Q9ULW0
C018R143	5736711	1.8249	1.6678	2.39775	1.96348	TBP	TATA-box-binding protein		P53361
C106R137	5736711	1.86284	1.70355	2.44604	2.00414	TBP	TATA-box-binding protein		P53361
C101R072	5738022	1.83145	1.77671	2.80995	2.13937	TBP	TATA-box-binding protein		P53361
C031R098	5733562	2.52239	3.19627	1.80909	2.50925		TFIIF_alpha, Transcription initiation factor IIF, alpha subunit (TFIIF-alpha). Transcription initiation factor IIF, alpha subunit (TFIIF-alpha) or RNA polymerase II-associating protein 74 (RAP74) is the large subunit of transcription factor IIF (TFIIF), which is essential for accurate initiation and stimulates elongation by RNA polymerase II.
C148R030	5723833	2.56874	1.68686	8.14851	4.1347	ThTPase	Thiamine-triphosphatase	105663	Q8JZL3
C046R022	5725903	1.94498	1.52764	2.45094	1.97452		THUMP domain-containing protein 1 homolog	38533	Q9VZD8
C157R148	5731326	4.00573	1.88453	2.84854	2.91293		Thymidine kinase 2, mitochondrial		O00142
C047R022	5729449	1.69948	1.65098	1.52748	1.62598		Transcription factor BTF3 homolog 4	539753	Q2KIY7
C116R128	5725738	2.0744	1.94464	3.35485	2.45796		Transcription termination factor 2	45894	P34739
C089R161	5725564	1.63585	1.87121	1.65912	1.72206		Transcriptional activator protein Pur-beta	393519	Q6PHK6
C224R055	5733596	1.52575	1.52912	1.77868	1.61118		Transcriptional adapter 2B	40966	Q8I8V0
C201R148	5730151	1.93849	2.08664	2.05714	2.02742	ADA3-like protein A	Transcriptional adapter 3-like A	379602	Q6PGT0
C172R106	5731664	2.27823	1.80685	1.57867	1.88792	HsGCN1	Translational activator GCN1		Q92616
C100R135	5723836	2.29694	1.77648	1.56268	1.8787		Transmembrane and TPR repeat-containing protein CG4050	37401	Q7K4B6
C238R138	5723836	1.95946	1.89102	1.62017	1.82355		Transmembrane and TPR repeat-containing protein CG4050	37401	Q7K4B6
C048R015	5734822	1.66468	1.5043	4.17593	2.4483		Transmembrane protein 120 homolog	31270	Q9U1M2
C099R051	5733020	1.5673	1.54596	5.02529	2.71285		Transmembrane protein 120 homolog	31270	Q9U1M2
C128R062	5733140	1.9707	1.51965	2.35799	1.94945		Transmembrane protein 194A	210035	Q6ZQE4
C076R030	5731434	3.15104	1.76039	2.91622	2.60922	tRNA(m1A58)MTase subunit TRM6	tRNA (adenine-N(1)-)-methyltransferase non-catalytic subunit TRM6	51605	Q9UJA5
C250R131	5731434	2.67684	1.78711	2.30885	2.2576	tRNA(m1A58)MTase subunit TRM6	tRNA (adenine-N(1)-)-methyltransferase non-catalytic subunit TRM6	51605	Q9UJA5
C046R035	5730624	1.97618	1.66329	1.58675	1.74207		tRNA (guanine-N(7)-)-methyltransferase	6095251	A8NFF0
C163R090	5730624	1.9603	1.82438	1.7636	1.84943		tRNA (guanine-N(7)-)-methyltransferase	6095251	A8NFF0
C077R035	5730324	1.92481	2.00622	1.51464	1.81522	IPTase	tRNA isopentenyltransferase, mitochondrial	66966	Q80UN9
C230R021	5732426	7.4136	3.08967	12.0112	7.50483		Trypsin-1		P00765
C005R022	5732538	2.47751	1.51965	2.47572	2.15763	U1 snRNP protein A	U1 small nuclear ribonucleoprotein A	31442	P43332
C092R016	5732538	2.58046	1.59314	2.60552	2.25971	U1 snRNP protein A	U1 small nuclear ribonucleoprotein A	31442	P43332
C104R063	5734871	2.4889	1.914	2.61197	2.33829		U3 small nucleolar RNA-associated protein 15 homolog	426152	Q5F3D7
C178R118	5734871	2.13192	1.52882	2.37117	2.01064		U3 small nucleolar RNA-associated protein 15 homolog	426152	Q5F3D7
C035R108	5733314	2.04822	2.1118	2.53329	2.2311		U3 small nucleolar RNA-associated protein 15 homolog	526343	A7MB12
C173R007	5730949	2.42835	1.69381	2.72657	2.28291		U3 small nucleolar RNA-associated protein 18 homolog	217109	Q5SSI6
C043R039	5728355	2.0828	1.76995	2.19925	2.01733	U3 snoRNP-associated 55 kDa protein	U3 small nucleolar RNA-interacting protein 2	9136	O43818
C051R073	5728355	2.01928	1.88365	2.53753	2.14682	U3 snoRNP-associated 55 kDa protein	U3 small nucleolar RNA-interacting protein 2	9136	O43818
C084R146	5726335	2.34182	2.06164	3.30007	2.56784	U3 snoRNP-associated 55 kDa protein	U3 small nucleolar RNA-interacting protein 2	27966	Q91WM3
C113R074	5726335	2.0652	1.98212	2.04592	2.03108	U3 snoRNP-associated 55 kDa protein	U3 small nucleolar RNA-interacting protein 2	27966	Q91WM3
C022R065	5731813	2.53433	2.38356	2.43513	2.45101		U7 snRNA-associated Sm-like protein LSm11	134353	P83369
C166R104	5731813	2.08579	2.10726	2.65719	2.28341		U7 snRNA-associated Sm-like protein LSm11	134353	P83369
C126R059	5739060	3.61292	1.76645	7.25091	4.21009	E2-230K	Ubiquitin-conjugating enzyme E2 O	217342	Q6ZPJ3
C054R131	5726167	2.20098	1.65231	2.3853	2.07953		Uncharacterized protein C20orf72	92667	Q9BQP7
C139R003	5726167	2.51225	1.59516	2.62557	2.24433		Uncharacterized protein C20orf72	92667	Q9BQP7
C189R024	5737145	2.65501	1.51131	2.63102	2.26578		Uncharacterized protein C20orf72	92667	Q9BQP7
C093R071	5728412	1.66176	2.0134	1.78568	1.82028		Uncharacterized protein CG1785	31810	Q9W3C2
C028R039	5729496	1.70495	1.85302	1.67753	1.74516		Uncharacterized protein ZC395.10	175727	Q23280
C087R061	5735819	1.76245	1.60362	1.63698	1.66768		Uncharacterized protein ZC395.10	175727	Q23280
C198R104	5731373	1.95593	1.95738	1.79252	1.90195		Uncharacterized protein ZC395.10	175727	Q23280
C212R152	5729496	1.74427	1.79124	1.73366	1.75639		Uncharacterized protein ZC395.10	175727	Q23280
C244R056	5735819	1.89904	1.55552	1.8026	1.75239		Uncharacterized protein ZC395.10	175727	Q23280
C252R120	5724541	1.85391	1.85348	1.75935	1.82225		Uncharacterized protein ZC395.10	175727	Q23280
C254R050	5724541	1.88633	1.9137	1.72998	1.84334		Uncharacterized protein ZC395.10	175727	Q23280
C259R066	5731373	1.81248	1.71879	1.7933	1.77485		Uncharacterized protein ZC395.10	175727	Q23280
C057R010	5729035	1.87171	1.6393	1.7938	1.76827		Uncharacterized protein ZC395.10	175727	Q23280
C009R043	5730875	1.77189	1.61036	1.85081	1.74435		UNKNOWN
C017R054	5736199	2.23333	2.17874	4.98982	3.13396		UNKNOWN
C020R133	5733452	7.70524	3.68102	11.922	7.76943		UNKNOWN
C022R028	5734321	1.88696	2.46141	1.60889	1.98575		UNKNOWN
C024R095	5726533	2.1791	2.47938	2.33829	2.33226		UNKNOWN
C029R005	5723915	3.07103	2.23052	2.85302	2.71819		UNKNOWN
C029R096	5735615	1.88273	1.5751	2.7648	2.07421		UNKNOWN
C036R013	5733452	9.10806	4.18732	15.114	9.46979		UNKNOWN
C042R010	5729237	1.8969	1.5323	1.85806	1.76242		UNKNOWN
C043R050	5731156	52.0762	2.07447	89.8507	48.0005		UNKNOWN
C044R113	5737383	28.4964	2.12756	44.944	25.1893		UNKNOWN
C049R163	5729247	5.51202	1.61574	18.2251	8.45095		UNKNOWN
C051R049	5735842	1.85077	1.70382	1.67707	1.74389		UNKNOWN
C056R163	5726127	1.55001	2.53288	3.18482	2.42257		UNKNOWN
C064R050	5732945	45.5555	2.00176	98.0763	48.5445		UNKNOWN
C065R039	5730148	1.82539	1.73902	1.70718	1.7572		UNKNOWN
C067R142	5737692	2.88372	3.3148	1.57665	2.59172		UNKNOWN
C069R033	5734321	1.94045	2.72602	1.68808	2.11818		UNKNOWN
C072R078	5730973	1.76638	1.59925	2.50861	1.95808		UNKNOWN
C074R167	5730973	1.59387	1.77918	2.06241	1.81182		UNKNOWN
C082R034	5722173	3.82887	1.52383	6.37808	3.91026		UNKNOWN
C086R162	5732632	82.0169	2.15894	102.337	62.1709		UNKNOWN
C090R019	5732904	82.0894	3.11046	217.052	100.751		UNKNOWN
C090R069	5730614	6.50549	2.56642	10.2174	6.42977		UNKNOWN
C093R158	5737383	31.2459	2.79906	45.3374	26.4608		UNKNOWN
C100R087	5738795	3.56659	1.77327	3.33242	2.89076		UNKNOWN
C100R094	5731156	158.353	2.84619	70.5216	77.2404		UNKNOWN
C103R128	5737368	3.77417	1.99411	4.06068	3.27632		UNKNOWN
C109R003	5739763	2.01959	2.25072	2.45345	2.24125		UNKNOWN
C114R046	5735065	11.5846	1.74136	42.59	18.6386		UNKNOWN
C117R169	5723915	2.78178	2.21609	3.02551	2.67446		UNKNOWN
C124R016	5726533	2.2418	2.47402	2.28662	2.33415		UNKNOWN
C136R027	5731727	1.71273	1.52615	1.92621	1.7217		UNKNOWN
C138R145	5735615	2.18535	1.57562	2.7296	2.16352		UNKNOWN
C152R045	5730614	5.41876	2.48865	9.50048	5.80263		UNKNOWN
C162R026	5734919	1.59045	2.39281	1.55146	1.8449		UNKNOWN
C162R098	5731971	2.92092	2.90612	1.85968	2.56224		UNKNOWN
C162R100	5732904	80.1287	2.34158	292.218	124.896		UNKNOWN
C168R101	5734919	1.72059	2.33762	2.08057	2.04626		UNKNOWN
C180R002	5732945	22.1971	1.83952	88.6545	37.5637		UNKNOWN
C183R075	5739414	1.81606	1.69547	1.63078	1.7141		UNKNOWN
C188R130	5737368	3.53659	1.98518	4.16697	3.22958		UNKNOWN
C189R048	5735842	1.64828	1.86099	1.61626	1.70851		UNKNOWN
C189R160	5736199	2.18834	2.19477	5.814	3.39904		UNKNOWN
C190R155	5722173	3.29484	1.58124	6.46034	3.77881		UNKNOWN
C192R066	5728741	2.01094	2.32845	2.1602	2.16653		UNKNOWN
C195R064	5739763	2.18601	2.20019	2.32657	2.23759		UNKNOWN
C196R170	5731971	2.68142	2.2126	2.08244	2.32548		UNKNOWN
C197R095	5730148	1.87467	1.61114	1.99464	1.82682		UNKNOWN
C200R001	5729237	1.64628	1.53769	1.63799	1.60732		UNKNOWN
C202R087	5729247	4.61238	1.7298	8.32498	4.88905		UNKNOWN
C207R017	5726127	1.69246	2.35032	3.23433	2.4257		UNKNOWN
C214R040	5731727	1.69952	1.56811	2.20565	1.82443		UNKNOWN
C217R036	5731894	32.6439	2.20556	42.3573	25.7356		UNKNOWN
C219R045	5739414	1.51764	1.66225	1.50441	1.56143		UNKNOWN
C227R097	5730279	1.56573	2.56692	1.53596	1.88954		UNKNOWN
C230R032	5731894	19.8433	1.60145	20.4921	13.9789		UNKNOWN
C231R064	5732632	49.8475	1.71312	298.132	116.564		UNKNOWN
C235R123	5738795	3.58345	1.7674	2.81082	2.72056		UNKNOWN
C243R086	5728741	1.86702	2.12434	1.741	1.91079		UNKNOWN
C251R047	5730279	1.62651	2.3868	1.7197	1.911		UNKNOWN
C253R046	5737692	2.57094	2.93618	1.69607	2.40106		UNKNOWN
C254R089	5735065	11.0351	1.50291	27.7563	13.4314		UNKNOWN
C255R073	5730875	1.76655	1.641	1.88863	1.76539		UNKNOWN
C013R165	5733058	2.47592	1.50155	4.17021	2.71589		UNKNOWN
C018R029	5727929	1.62162	1.7559	3.41792	2.26515		UNKNOWN
C026R144	5723689	142.501	7.88586	175.824	108.737		UNKNOWN
C042R020	5732256	60.7486	2.21558	511.699	191.554		UNKNOWN
C044R049	5727570	2.26587	1.78636	2.80106	2.28443		UNKNOWN
C048R148	5731043	18.7212	1.81681	98.2113	39.5831		UNKNOWN
C050R112	5731079	97.1645	6.14027	186.397	96.5672		UNKNOWN
C054R046	5733749	1.86281	1.67538	2.39523	1.97781		UNKNOWN
C055R084	5734222	1.71179	2.28671	1.50005	1.83285		UNKNOWN
C055R087	5738329	2.41272	1.63244	2.49305	2.1794		UNKNOWN
C065R046	5731948	5.09323	1.5762	14.6972	7.12219		UNKNOWN
C068R075	5735996	3.1025	1.51605	5.15117	3.25657		UNKNOWN
C070R033	5725030	1.96479	2.13446	1.52415	1.87446		UNKNOWN
C075R145	5732250	1.72558	3.33131	43.7206	16.2592		UNKNOWN
C078R063	5729609	1.68977	2.06159	1.63922	1.79686		UNKNOWN
C086R102	5738608	6.11261	3.02645	1.73868	3.62591		UNKNOWN
C087R140	5731108	3.87561	1.59923	12.1223	5.86573		UNKNOWN
C090R027	5733294	85.661	3.91019	56.0831	48.5514		UNKNOWN
C091R156	5732436	81.473	5.31918	147.793	78.1951		UNKNOWN
C096R152	5737207	2.94655	1.50057	4.25583	2.90098		UNKNOWN
C097R066	5736970	4.67623	2.49235	8.21763	5.12874		UNKNOWN
C102R086	5726585	2.08963	2.1324	1.66168	1.96124		UNKNOWN
C102R122	5738859	2.11984	2.06796	5.44965	3.21248		UNKNOWN
C103R016	5725374	1.66857	1.71845	1.55766	1.64823		UNKNOWN
C104R028	5737011	2.2114	2.00501	2.38594	2.20078		UNKNOWN
C106R023	5736661	1.7972	1.5219	5.32693	2.88201		UNKNOWN
C115R013	5724672	1.54254	1.81758	1.83151	1.73054		UNKNOWN
C131R146	5735920	2.27294	2.53433	1.89943	2.23556		UNKNOWN
C133R088	5722820	2.21382	2.38632	2.34407	2.31474		UNKNOWN
C135R169	5729314	1.95291	1.59411	2.90768	2.15157		UNKNOWN
C138R119	5724578	2.13959	1.57547	2.73829	2.15112		UNKNOWN
C139R009	5723286	3.11263	2.35124	3.20533	2.88973		UNKNOWN
C141R095	5735971	4.51142	1.96276	4.8447	3.77296		UNKNOWN
C141R097	5731132	6.70067	3.41466	5.66897	5.26143		UNKNOWN
C144R026	5736931	1.55906	1.54464	2.51781	1.87384		UNKNOWN
C151R105	5731953	1.61827	2.11817	1.67226	1.8029		UNKNOWN
C154R066	5722971	25.1451	38.5009	9.29273	24.3129		UNKNOWN
C155R029	5739370	1.82363	2.10645	1.64044	1.85684		UNKNOWN
C166R074	5726252	2.29925	1.55331	6.44801	3.43352		UNKNOWN
C174R033	5723571	1.82634	1.82784	1.51434	1.72284		UNKNOWN
C194R111	5730002	2.59398	1.53403	5.68126	3.26976		UNKNOWN
C201R157	5730314	1.50729	2.05379	1.72317	1.76142		UNKNOWN
C202R023	5732071	1.66372	1.66208	1.68075	1.66885		UNKNOWN
C210R137	5727485	1.66303	1.56558	2.62991	1.95284		UNKNOWN
C214R045	5737002	10.9384	1.83452	26.0883	12.9538		UNKNOWN
C214R051	5732817	40.1236	1.77863	72.9249	38.2757		UNKNOWN
C215R084	5728025	2.56418	2.3413	4.07754	2.99434		UNKNOWN
C216R099	5732862	3.12745	1.97597	5.65321	3.58554		UNKNOWN
C216R167	5726852	2.77488	17.7624	15.5318	12.023		UNKNOWN
C219R071	5731209	16.1133	1.64632	51.7446	23.1681		UNKNOWN
C221R037	5731947	9.72245	1.50501	49.9745	20.4006		UNKNOWN
C225R148	5737226	1.58549	1.56125	2.19424	1.78032		UNKNOWN
C226R091	5725694	2.38099	1.91084	3.83115	2.70766		UNKNOWN
C232R127	5738970	2.84792	1.63007	7.45259	3.97686		UNKNOWN
C235R098	5731408	32.8445	3.29338	100.104	45.414		UNKNOWN
C236R086	5722746	2.13497	1.69195	2.3143	2.04708		UNKNOWN
C237R124	5731897	1.68275	1.54443	1.88621	1.70446		UNKNOWN
C241R081	5727906	4.14704	1.63139	4.64117	3.4732		UNKNOWN
C257R063	5738206	1.75404	1.56103	2.82738	2.04748		UNKNOWN
C257R150	5725914	2.94754	1.84423	5.10704	3.29961		UNKNOWN
C261R036	5724030	21.5038	25.8627	5.66872	17.6784		UNKNOWN
C074R021	5723656	1.89637	1.73513	1.6266	1.7527	p30	Upstream activation factor subunit UAF30	854470	Q08747
C008R046	5730016	2.29951	2.24627	1.74842	2.09807	TA-WDRP	WD repeat-containing protein 36	134430	Q8NI36
C085R017	5730016	2.02293	2.03912	1.72633	1.92946	TA-WDRP	WD repeat-containing protein 36	134430	Q8NI36
C110R084	5726803	2.44575	1.72342	1.96642	2.0452		WD repeat-containing protein 43	72515	Q6ZQL4
C163R163	5726803	2.52142	2.06461	2.05211	2.21272		WD repeat-containing protein 43	72515	Q6ZQL4
C034R133	5725111	1.79632	2.01695	1.93103	1.91476		WD repeat-containing protein 46	9277	O15213
C105R131	5725111	2.05216	1.83928	2.1317	2.00771		WD repeat-containing protein 46	9277	O15213
C031R062	5732449	1.9327	1.51783	1.63289	1.69447		WD repeat-containing protein 55 homolog	6501174	B3M1G0
C046R068	5732449	1.83685	1.82146	1.5348	1.73104		WD repeat-containing protein 55 homolog	6501174	B3M1G0
C224R125	5726215	1.96085	1.52529	1.71553	1.73389		WD repeat-containing protein 55 homolog	6501174	B3M1G0
C083R079	5734982	6.87695	2.58858	7.55986	5.67513		WD repeat-containing protein 76	735144	Q4KLQ5
C134R119	5732198	1.77913	1.53663	2.65178	1.98918		WD repeat-containing protein 89	539045	Q3ZBK1
C265R070	5725342	1.63403	1.53317	2.75855	1.97525	WBP-11	WW domain-binding protein 11	402950	Q6P0D5
C005R099	5732041	1.72096	1.77817	3.16158	2.22024		Zinc finger matrin-type protein 2 sp|Q9CPW7.1|ZMAT2_MOUSE RecName: Full=Zinc finger matrin-type protein 2	153527	Q96NC0
C122R169	5732041	1.69608	1.82651	3.26406	2.26222		Zinc finger matrin-type protein 2 sp|Q9CPW7.1|ZMAT2_MOUSE RecName: Full=Zinc finger matrin-type protein 2	153527	Q96NC0
C196R012	5723585	2.2681	1.97251	3.59425	2.61162		Zinc finger protein 594	84622	Q96JF6
C243R040	5724300	1.87165	1.56715	2.58355	2.00745		Zinc finger protein ZPR1	8882	O75312
C103R088	5735064	14.5909	1.51962	27.7507	14.6204		ZnF_C4, c4 zinc finger in nuclear hormone receptors.

## Sheet: Sex-specific g(207)
Transcripts in this list were not expressed above background detection (i.e. Cy5 < 500 intensity units) in any of the individuals of one sex
Spot ID	Contig ID	Gene	Description	GeneID	SwissProt Accession	Sex-specific
C036R083	5736895		An_peroxidase, Animal haem peroxidase.			FEMALE
C064R077	5736895		An_peroxidase, Animal haem peroxidase.			FEMALE
C141R139	5731817	E-Syt3	Extended synaptotagmin-3	496831	Q5M7N9	FEMALE
C023R088	5733325	GlcN6P deaminase	Glucosamine-6-phosphate isomerase	5578837	Q16HW7	FEMALE
C056R148	5736947	GlcN6P deaminase 1	Glucosamine-6-phosphate isomerase 1	522919	A4FV08	FEMALE
C106R072	5731952		Nuclear distribution protein nudE-like 1-A	394244	Q7SXI6	FEMALE
C160R086	5731673		Ras-related protein Rab-32	10981	Q13637	FEMALE
C119R068	5736753		Rhotekin-2	219790	Q8IZC4	FEMALE
C167R141	5725836		Serine proteinase stubble catalytic chain	41958	Q05319	FEMALE
C168R049	5725836		Serine proteinase stubble catalytic chain	41958	Q05319	FEMALE
C042R020	5732256		UNKNOWN			FEMALE
C043R050	5731156		UNKNOWN			FEMALE
C044R113	5737383		UNKNOWN			FEMALE
C048R148	5731043		UNKNOWN			FEMALE
C090R019	5732904		UNKNOWN			FEMALE
C093R158	5737383		UNKNOWN			FEMALE
C162R100	5732904		UNKNOWN			FEMALE
C180R002	5732945		UNKNOWN			FEMALE
C214R045	5737002		UNKNOWN			FEMALE
C217R036	5731894		UNKNOWN			FEMALE
C221R037	5731947		UNKNOWN			FEMALE
C231R064	5732632		UNKNOWN			FEMALE
C235R098	5731408		UNKNOWN			FEMALE
C103R088	5735064		ZnF_C4, c4 zinc finger in nuclear hormone receptors.			FEMALE
C149R137	5722253		Acidic repeat-containing protein	93953	Q96QF7	MALE
C223R146	5731398		Actin		Q92192	MALE
C138R117	5721986		Brain-specific angiogenesis inhibitor 1	107831	Q3UHD1	MALE
C153R091	5721986		Brain-specific angiogenesis inhibitor 1	107831	Q3UHD1	MALE
C019R003	5729485		Brain-specific angiogenesis inhibitor 2	230775	Q8CGM1	MALE
C052R112	5729485		Brain-specific angiogenesis inhibitor 2	230775	Q8CGM1	MALE
C018R134	5724345	CANP A	Calpain-A catalytic subunit	37232	Q11002	MALE
C141R096	5723650	CANP A	Calpain-A catalytic subunit	37232	Q11002	MALE
C197R005	5723650	CANP A	Calpain-A catalytic subunit	37232	Q11002	MALE
C183R004	5734211	CA-I	Carbonic anhydrase 1		P83299	MALE
C129R163	5734734	CA-IX	Carbonic anhydrase 9	230099	Q8VHB5	MALE
C131R016	5728348	CA-IX	Carbonic anhydrase 9	230099	Q8VHB5	MALE
C135R079	5728348	CA-IX	Carbonic anhydrase 9	230099	Q8VHB5	MALE
C161R087	5728347	CA-IX	Carbonic anhydrase 9	230099	Q8VHB5	MALE
C196R116	5734734	CA-IX	Carbonic anhydrase 9	230099	Q8VHB5	MALE
C161R058	5726026		Carboxypeptidase B		P04069	MALE
C070R100	5727360	CKI-alpha	Casein kinase I isoform alpha	113927	P97633	MALE
C154R094	5723516	Dpxt	Chorion peroxidase heavy chain	42131	Q9VEG6	MALE
C176R138	5734855	Dpxt	Chorion peroxidase heavy chain	42131	Q9VEG6	MALE
C249R003	5723516	Dpxt	Chorion peroxidase heavy chain	42131	Q9VEG6	MALE
C016R073	5729574		Cytosolic non-specific dipeptidase	512626	Q3ZC84	MALE
C261R120	5729574		Cytosolic non-specific dipeptidase	512626	Q3ZC84	MALE
C163R142	5729947	DPP	Dentin sialoprotein	1834	Q9NZW4	MALE
C219R149	5729947	DPP	Dentin sialoprotein	1834	Q9NZW4	MALE
C251R028	5729213		E1_DerP2_DerF2, ML domain. ML domain - MD-2-related lipid recognition domain. This family consists of proteins from plants, animals and fungi, including dust mite allergen Der P 2. It has been implicate in lipid recognition, particularly in the recognition of pathogen related products. A mutation in Npc2 causes a rare form of Niemann-Pick type C2 disease.			MALE
C122R072	5730284		Glutamate [NMDA] receptor-associated protein 1	2907	Q7Z429	MALE
C022R130	5726426		Kelch-like protein 20	100174619	Q5R7B8	MALE
C057R056	5725610		KU, BPTI/Kunitz family of serine protease inhibitors. Serine protease inhibitors. One member of the family is encoded by an alternatively-spliced form of Alzheimers amyloid beta-protein.			MALE
C084R101	5726199		KU, BPTI/Kunitz family of serine protease inhibitors. Serine protease inhibitors. One member of the family is encoded by an alternatively-spliced form of Alzheimers amyloid beta-protein.			MALE
C259R083	5727965		Kunitz_BPTI, Kunitz/Bovine pancreatic trypsin inhibitor domain. Indicative of a protease inhibitor, usually a serine protease inhibitor. Structure is a disulfide rich alpha+beta fold. BPTI (bovine pancreatic trypsin inhibitor) is an extensively studied model structure. Certain family members are similar to the tick anticoagulant peptide (TAP). This is a highly selective inhibitor of factor Xa in …			MALE
C259R052	5728037		Kunitz/BPTI-like toxin		B5L5M7	MALE
C089R070	5733438	MRJP-3	Major royal jelly protein 3	406121	Q17060	MALE
C063R028	5736377		Papilin	43872	Q868Z9	MALE
C066R049	5726094		Papilin	43872	Q868Z9	MALE
C142R005	5736193		Papilin	43872	Q868Z9	MALE
C183R014	5735466		Papilin	43872	Q868Z9	MALE
C240R052	5735466		Papilin	43872	Q868Z9	MALE
C026R132	5727228	DmPO	Peroxidase	2768671	Q01603	MALE
C252R032	5736372		Probable serine/threonine-protein kinase clkA	8622923	Q54UA9	MALE
C006R078	5729932		Proclotting enzyme heavy chain		P21902	MALE
C048R145	5729932		Proclotting enzyme heavy chain		P21902	MALE
C042R133	5723616		Putative uncharacterized protein DDB_G0277255	8620953	Q86K40	MALE
C154R018	5734662		RT_LTR, RT_LTR: Reverse transcriptases (RTs) from retrotransposons and retroviruses which have long terminal repeats (LTRs) in their DNA copies but not in their RNA template. RT catalyzes DNA replication from an RNA template, and is responsible for the replication of retroelements. An RT gene is usually indicative of a mobile element such as a retrotransposon or retrovirus. RTs are present in a v…			MALE
C118R020	5732404		Serine protease persephone	32832	Q9VWU1	MALE
C161R035	5721965		SERPIN, SERine Proteinase INhibitors (serpins) exhibit conformational polymorphism shifting from native to cleaved, latent, delta, or polymorphic forms. Many serpins, such as antitrypsin and antichymotrypsin, function as serine protease inhibitors which regulate blood coagulation cascades. Non-inhibitory serpins perform many diverse functions such as chaperoning proteins or transporting hormones.…			MALE
C215R048	5721965		SERPIN, SERine Proteinase INhibitors (serpins) exhibit conformational polymorphism shifting from native to cleaved, latent, delta, or polymorphic forms. Many serpins, such as antitrypsin and antichymotrypsin, function as serine protease inhibitors which regulate blood coagulation cascades. Non-inhibitory serpins perform many diverse functions such as chaperoning proteins or transporting hormones.…			MALE
C167R125	5734341		Sodium-dependent nutrient amino acid transporter 1	6566079	B4JMC1	MALE
C008R159	5732455		Tryp_SPc, Trypsin-like serine protease. Many of these are synthesised as inactive precursor zymogens that are cleaved during limited proteolysis to generate their active forms. A few, however, are active as single chain molecules, and others are inactive due to substitutions of the catalytic triad residues.			MALE
C009R051	5732106		Tryp_SPc, Trypsin-like serine protease. Many of these are synthesised as inactive precursor zymogens that are cleaved during limited proteolysis to generate their active forms. A few, however, are active as single chain molecules, and others are inactive due to substitutions of the catalytic triad residues.			MALE
C160R074	5732168		Tubulin alpha-2 chain	41183	P06604	MALE
C033R067	5722948		Uncharacterized protein DDB_G0283357	8624043	Q54R73	MALE
C036R012	5729270		Uncharacterized protein DDB_G0283357	8624043	Q54R73	MALE
C037R048	5722948		Uncharacterized protein DDB_G0283357	8624043	Q54R73	MALE
C203R032	5733632		Uncharacterized protein DDB_G0283357	8624043	Q54R73	MALE
C220R028	5733632		Uncharacterized protein DDB_G0283357	8624043	Q54R73	MALE
C249R007	5729914		Uncharacterized protein DDB_G0283357	8624043	Q54R73	MALE
C254R091	5729914		Uncharacterized protein DDB_G0283357	8624043	Q54R73	MALE
C010R085	5740030		UNKNOWN			MALE
C011R030	5723432		UNKNOWN			MALE
C014R009	5723956		UNKNOWN			MALE
C018R123	5725938		UNKNOWN			MALE
C019R152	5729400		UNKNOWN			MALE
C020R044	5723956		UNKNOWN			MALE
C021R034	5723480		UNKNOWN			MALE
C023R133	5730606		UNKNOWN			MALE
C024R027	5724883		UNKNOWN			MALE
C025R088	5722161		UNKNOWN			MALE
C026R106	5724259		UNKNOWN			MALE
C029R159	5723714		UNKNOWN			MALE
C033R147	5723694		UNKNOWN			MALE
C034R064	5737365		UNKNOWN			MALE
C038R016	5722743		UNKNOWN			MALE
C039R127	5727464		UNKNOWN			MALE
C041R101	5722252		UNKNOWN			MALE
C042R116	5740865		UNKNOWN			MALE
C043R072	5726089		UNKNOWN			MALE
C048R120	5728185		UNKNOWN			MALE
C049R016	5734654		UNKNOWN			MALE
C049R047	5729263		UNKNOWN			MALE
C049R088	5723694		UNKNOWN			MALE
C049R129	5732585		UNKNOWN			MALE
C055R165	5734782		UNKNOWN			MALE
C057R032	5723432		UNKNOWN			MALE
C057R123	5735844		UNKNOWN			MALE
C058R112	5724158		UNKNOWN			MALE
C061R158	5735959		UNKNOWN			MALE
C063R104	5725193		UNKNOWN			MALE
C064R022	5726170		UNKNOWN			MALE
C066R101	5725403		UNKNOWN			MALE
C068R095	5727529		UNKNOWN			MALE
C072R077	5724255		UNKNOWN			MALE
C073R042	5721968		UNKNOWN			MALE
C073R097	5735905		UNKNOWN			MALE
C073R150	5735180		UNKNOWN			MALE
C077R108	5725952		UNKNOWN			MALE
C078R013	5735180		UNKNOWN			MALE
C079R020	5731189		UNKNOWN			MALE
C081R002	5725938		UNKNOWN			MALE
C081R146	5732297		UNKNOWN			MALE
C082R088	5722113		UNKNOWN			MALE
C087R144	5727149		UNKNOWN			MALE
C091R125	5722378		UNKNOWN			MALE
C096R067	5723961		UNKNOWN			MALE
C098R092	5725380		UNKNOWN			MALE
C101R132	5722743		UNKNOWN			MALE
C103R050	5724540		UNKNOWN			MALE
C104R137	5723970		UNKNOWN			MALE
C104R164	5728832		UNKNOWN			MALE
C108R110	5725928		UNKNOWN			MALE
C109R018	5727836		UNKNOWN			MALE
C110R005	5722252		UNKNOWN			MALE
C112R015	5725952		UNKNOWN			MALE
C114R029	5725932		UNKNOWN			MALE
C116R051	5728726		UNKNOWN			MALE
C116R111	5740202		UNKNOWN			MALE
C116R133	5723210		UNKNOWN			MALE
C123R118	5724883		UNKNOWN			MALE
C125R052	5729263		UNKNOWN			MALE
C126R144	5724540		UNKNOWN			MALE
C127R068	5726826		UNKNOWN			MALE
C130R170	5723951		UNKNOWN			MALE
C134R150	5727281		UNKNOWN			MALE
C135R017	5731236		UNKNOWN			MALE
C135R082	5735599		UNKNOWN			MALE
C137R119	5722107		UNKNOWN			MALE
C138R033	5735038		UNKNOWN			MALE
C138R163	5732947		UNKNOWN			MALE
C140R039	5728726		UNKNOWN			MALE
C143R146	5722113		UNKNOWN			MALE
C145R023	5724259		UNKNOWN			MALE
C150R161	5732297		UNKNOWN			MALE
C153R006	5723970		UNKNOWN			MALE
C153R041	5728702		UNKNOWN			MALE
C157R149	5726092		UNKNOWN			MALE
C165R119	5734782		UNKNOWN			MALE
C166R127	5735181		UNKNOWN			MALE
C168R068	5725921		UNKNOWN			MALE
C168R145	5736936		UNKNOWN			MALE
C175R152	5722887		UNKNOWN			MALE
C175R161	5726170		UNKNOWN			MALE
C176R077	5722107		UNKNOWN			MALE
C178R122	5727836		UNKNOWN			MALE
C186R125	5724158		UNKNOWN			MALE
C186R169	5723083		UNKNOWN			MALE
C188R080	5727424		UNKNOWN			MALE
C191R137	5735905		UNKNOWN			MALE
C192R009	5725193		UNKNOWN			MALE
C196R168	5734970		UNKNOWN			MALE
C198R083	5729580		UNKNOWN			MALE
C199R021	5740202		UNKNOWN			MALE
C200R157	5737365		UNKNOWN			MALE
C202R068	5735354		UNKNOWN			MALE
C202R169	5722495		UNKNOWN			MALE
C203R149	5735608		UNKNOWN			MALE
C204R162	5723714		UNKNOWN			MALE
C207R033	5726014		UNKNOWN			MALE
C207R061	5725928		UNKNOWN			MALE
C207R074	5735038		UNKNOWN			MALE
C209R104	5728832		UNKNOWN			MALE
C210R046	5734239		UNKNOWN			MALE
C212R168	5731590		UNKNOWN			MALE
C213R044	5725932		UNKNOWN			MALE
C214R145	5725406		UNKNOWN			MALE
C219R097	5724609		UNKNOWN			MALE
C220R063	5736030		UNKNOWN			MALE
C225R044	5727529		UNKNOWN			MALE
C225R058	5725406		UNKNOWN			MALE
C227R010	5726826		UNKNOWN			MALE
C227R073	5725380		UNKNOWN			MALE
C227R153	5727424		UNKNOWN			MALE
C228R015	5727281		UNKNOWN			MALE
C228R167	5735862		UNKNOWN			MALE
C241R153	5724591		UNKNOWN			MALE
C244R108	5723896		UNKNOWN			MALE
C251R007	5727464		UNKNOWN			MALE
C254R094	5729400		UNKNOWN			MALE
C257R163	5723961		UNKNOWN			MALE
C258R121	5731590		UNKNOWN			MALE
C259R116	5724811		UNKNOWN			MALE
C261R144	5730606		UNKNOWN			MALE
C262R126	5735870		UNKNOWN			MALE
C262R133	5726014		UNKNOWN			MALE
C083R024	5729499		ZnMc_adamalysin_II_like, Zinc-dependent metalloprotease; adamalysin_II_like subfamily. Adamalysin II is a snake venom zinc endopeptidase. This subfamily contains other snake venom metalloproteinases, as well as membrane-anchored metalloproteases belonging to the ADAM family. ADAMs (A Disintegrin And Metalloprotease) are glycoproteins, which play roles in cell signaling, cell fusion, and cell-cell…			MALE

## Sheet: Annotated sex-biased orphans
Newly annotated transcripts. These are marked as unknown in all other sheets. Use the Spot or Contig IDs to navigate the Additional Files for more information on the expression of these transcripts.
Spot ID	Contig ID	Sex-bias	E Value	Bitscore	Gene	Swissprot Accession	Description
C096R035	5734182	Male	5.14634e-08	56.9954	AQP12A	Q8IXF9	Aquaporin-12A OS=Homo sapiens GN=AQP12A PE=2 SV=1
C108R110	5725928	Male	5.38519e-05	47.3654	csgA	P21158	C-factor OS=Myxococcus xanthus GN=csgA PE=1 SV=1
C207R061	5725928	Male	5.38519e-05	47.3654	csgA	P21158	C-factor OS=Myxococcus xanthus GN=csgA PE=1 SV=1
C083R080	5726810	Male	2.93705e-06	51.6026		P0DKQ8	Conoporin-Cn1 OS=Conus consors PE=1 SV=1
C218R165	5726810	Male	2.93705e-06	51.6026		P0DKQ8	Conoporin-Cn1 OS=Conus consors PE=1 SV=1
C213R070	5722584	Male	4.55924e-11	66.2402	SLC1A1	P31597	Excitatory amino acid transporter 3 OS=Oryctolagus cuniculus GN=SLC1A1 PE=2 SV=1
C120R152	5727846	Male	1.39873e-06	52.7582	GGT1	P20735	Gamma-glutamyltranspeptidase 1 OS=Sus scrofa GN=GGT1 PE=2 SV=1
C134R019	5727846	Male	1.39873e-06	52.7582	GGT1	P20735	Gamma-glutamyltranspeptidase 1 OS=Sus scrofa GN=GGT1 PE=2 SV=1
C137R101	5730733	Male	5.4345e-05	49.2914	salm	P39770	Homeotic protein spalt-major OS=Drosophila melanogaster GN=salm PE=1 SV=3
C100R003	5725269	Male	1.09894e-06	52.7582	Klhl41	Q9ER30	Kelch-like protein 41 OS=Rattus norvegicus GN=Klhl41 PE=1 SV=1
C131R068	5725269	Male	1.09894e-06	52.7582	Klhl41	Q9ER30	Kelch-like protein 41 OS=Rattus norvegicus GN=Klhl41 PE=1 SV=1
C109R088	5729877	Male	8.21831e-07	54.6842	Tak1	Q9V3Q6	Mitogen-activated protein kinase kinase kinase 7 OS=Drosophila melanogaster GN=Tak1 PE=2 SV=1
C173R139	5729877	Male	8.21831e-07	54.6842	Tak1	Q9V3Q6	Mitogen-activated protein kinase kinase kinase 7 OS=Drosophila melanogaster GN=Tak1 PE=2 SV=1
C135R082	5735599	Male	4.85484e-07	53.9138	PRSS8	Q16651	Prostasin OS=Homo sapiens GN=PRSS8 PE=1 SV=1
C036R126	5726506	Male	9.18615e-05	48.521	ref(2)P	Q24629	Protein ref(2)P OS=Drosophila simulans GN=ref(2)P PE=4 SV=1
C191R163	5726506	Male	9.18615e-05	48.521	ref(2)P	Q24629	Protein ref(2)P OS=Drosophila simulans GN=ref(2)P PE=4 SV=1
C116R074	5722562	Male	9.27553e-05	46.2098	ATP2A1	O14983	Sarcoplasmic/endoplasmic reticulum calcium ATPase 1 OS=Homo sapiens GN=ATP2A1 PE=1 SV=1
C133R144	5736051	Male	5.33603e-09	60.077	unc-22	Q23551	Twitchin OS=Caenorhabditis elegans GN=unc-22 PE=1 SV=3
C174R033	5723571	Female	3.04989e-05	45.8246	SPBC83.06c	O94690	54S ribosomal protein c83.06c, mitochondrial OS=Schizosaccharomyces pombe (strain 972 / ATCC 24843) GN=SPBC83.06c PE=3 SV=2
C138R119	5724578	Female	8.90379e-09	58.5362	AAAS	Q9NRG9	Aladin OS=Homo sapiens GN=AAAS PE=1 SV=1
C104R028	5737011	Female	2.51439e-07	55.0694	Brd8	Q8R3B7	Bromodomain-containing protein 8 OS=Mus musculus GN=Brd8 PE=1 SV=2
C082R034	5722173	Female	4.16383e-08	58.9214	Ccna2	P51943	Cyclin-A2 OS=Mus musculus GN=Ccna2 PE=1 SV=2
C190R155	5722173	Female	4.16383e-08	58.9214	Ccna2	P51943	Cyclin-A2 OS=Mus musculus GN=Ccna2 PE=1 SV=2
C241R081	5727906	Female	6.92596e-10	64.6994	GPATCH1	Q24K12	G patch domain-containing protein 1 OS=Bos taurus GN=GPATCH1 PE=2 SV=1
C257R063	5738206	Female	2.19015e-05	46.9802	GTF3C5	Q9Y5Q8	General transcription factor 3C polypeptide 5 OS=Homo sapiens GN=GTF3C5 PE=1 SV=2
C055R087	5738329	Female	2.95313e-07	53.9138	HYLS1	Q4R2Y2	Hydrolethalus syndrome protein 1 homolog OS=Macaca fascicularis GN=HYLS1 PE=2 SV=1
C202R023	5732071	Female	1.11962e-06	50.0618	MRGBP	Q9NV56	MRG/MORF4L-binding protein OS=Homo sapiens GN=MRGBP PE=1 SV=1
C029R005	5723915	Female	1.54885e-07	57.7658	NCL	P15771	Nucleolin OS=Gallus gallus GN=NCL PE=1 SV=1
C117R169	5723915	Female	1.54885e-07	57.7658	NCL	P15771	Nucleolin OS=Gallus gallus GN=NCL PE=1 SV=1
C103R016	5725374	Female	2.25398e-16	78.5666	Pbdc1	Q9D0B6	Protein PBDC1 OS=Mus musculus GN=Pbdc1 PE=2 SV=1
C013R165	5733058	Female	2.71951e-05	50.447	Mss51	Q9D5Z5	Putative protein MSS51 homolog, mitochondrial OS=Mus musculus GN=Mss51 PE=2 SV=1
C065R039	5730148	Female	2.04767e-28	111.694	tma16	Q4V7N4	Translation machinery-associated protein 16 OS=Xenopus laevis GN=tma16 PE=2 SV=1
C197R095	5730148	Female	2.04767e-28	111.694	tma16	Q4V7N4	Translation machinery-associated protein 16 OS=Xenopus laevis GN=tma16 PE=2 SV=1
C115R013	5724672	Female	1.02996e-07	55.0694	tc3a	P34257	Transposable element Tc3 transposase OS=Caenorhabditis elegans GN=tc3a PE=1 SV=1
C044R049	5727570	Female	4.58688e-05	47.3654	SNRPA1	Q4R8Y8	U2 small nuclear ribonucleoprotein A' OS=Macaca fascicularis GN=SNRPA1 PE=2 SV=1
C221R037	5731947	Female	3.82632e-12	70.4774	ALG13	Q9NP73	UDP-N-acetylglucosamine transferase subunit ALG13 homolog OS=Homo sapiens GN=ALG13 PE=1 SV=2
C078R063	5729609	Female	4.48221e-51	184.111	C5orf22	Q49AR2	UPF0489 protein C5orf22 OS=Homo sapiens GN=C5orf22 PE=1 SV=2

## Sheet: Similar (r>0.95) C259R052
Trasncripts in this list are co-expressed with kunitz/BPTI-like toxin (probe ID: C259R052) based on similar expression patterns (Pearson's correlation; r>0.95)
Spot ID	Contig ID	Similarity	Gene	Description	GeneID	SwissProt Accession
C019R003	5729485	0.974415		Brain-specific angiogenesis inhibitor 2	230775	Q8CGM1
C183R004	5734211	0.954968	CA-I	Carbonic anhydrase 1		P83299
C110R005	5722252	0.979435		UNKNOWN
C197R005	5723650	0.958242	CANP A	Calpain-A catalytic subunit	37232	Q11002
C153R006	5723970	0.978995		UNKNOWN
C249R007	5729914	0.96961		Uncharacterized protein DDB_G0283357	8624043	Q54R73
C036R012	5729270	0.955879		Uncharacterized protein DDB_G0283357	8624043	Q54R73
C078R013	5735180	0.958137		UNKNOWN
C183R014	5735466	0.976784		Papilin	43872	Q868Z9
C112R015	5725952	0.968798		UNKNOWN
C228R015	5727281	0.972826		UNKNOWN
C038R016	5722743	0.969351		UNKNOWN
C109R018	5727836	0.975029		UNKNOWN
C199R021	5740202	0.961686		UNKNOWN
C064R022	5726170	0.96115		UNKNOWN
C063R028	5736377	0.977467		Papilin	43872	Q868Z9
C251R028	5729213	0.982579		E1_DerP2_DerF2, ML domain. ML domain - MD-2-related lipid recognition domain. This family consists of proteins from plants, animals and fungi, including dust mite allergen Der P 2. It has been implicate in lipid recognition, particularly in the recognition of pathogen related products. A mutation in Npc2 causes a rare form of Niemann-Pick type C2 disease.
C114R029	5725932	0.951215		UNKNOWN
C011R030	5723432	0.968583		UNKNOWN
C203R032	5733632	0.97361		Uncharacterized protein DDB_G0283357	8624043	Q54R73
C252R032	5736372	0.955321		Probable serine/threonine-protein kinase clkA	8622923	Q54UA9
C138R033	5735038	0.953101		UNKNOWN
C207R033	5726014	0.962421		UNKNOWN
C073R042	5721968	0.960348		UNKNOWN
C213R044	5725932	0.952898		UNKNOWN
C210R046	5734239	0.956303		UNKNOWN
C037R048	5722948	0.977934		Uncharacterized protein DDB_G0283357	8624043	Q54R73
C215R048	5721965	0.970441		SERPIN, SERine Proteinase INhibitors (serpins) exhibit conformational polymorphism shifting from native to cleaved, latent, delta, or polymorphic forms. Many serpins, such as antitrypsin and antichymotrypsin, function as serine protease inhibitors which regulate blood coagulation cascades. Non-inhibitory serpins perform many diverse functions such as chaperoning proteins or transporting hormones.…
C066R049	5726094	0.966872		Papilin	43872	Q868Z9
C009R051	5732106	0.954589		Tryp_SPc, Trypsin-like serine protease. Many of these are synthesised as inactive precursor zymogens that are cleaved during limited proteolysis to generate their active forms. A few, however, are active as single chain molecules, and others are inactive due to substitutions of the catalytic triad residues.
C240R052	5735466	0.962962		Papilin	43872	Q868Z9
C259R052	5728037	1		Kunitz/BPTI-like toxin		B5L5M7
C057R056	5725610	0.981355		KU, BPTI/Kunitz family of serine protease inhibitors. Serine protease inhibitors. One member of the family is encoded by an alternatively-spliced form of Alzheimers amyloid beta-protein.
C225R058	5725406	0.950721		UNKNOWN
C034R064	5737365	0.964551		UNKNOWN
C033R067	5722948	0.977284		Uncharacterized protein DDB_G0283357	8624043	Q54R73
C127R068	5726826	0.971112		UNKNOWN
C168R068	5725921	0.976536		UNKNOWN
C202R068	5735354	0.960609		UNKNOWN
C227R073	5725380	0.971106		UNKNOWN
C160R074	5732168	0.961544		Tubulin alpha-2 chain	41183	P06604
C072R077	5724255	0.968895		UNKNOWN
C176R077	5722107	0.97791		UNKNOWN
C135R079	5728348	0.967411	CA-IX	Carbonic anhydrase 9	230099	Q8VHB5
C188R080	5727424	0.976253		UNKNOWN
C198R083	5729580	0.955552		UNKNOWN
C259R083	5727965	0.972923		Kunitz_BPTI, Kunitz/Bovine pancreatic trypsin inhibitor domain. Indicative of a protease inhibitor, usually a serine protease inhibitor. Structure is a disulfide rich alpha+beta fold. BPTI (bovine pancreatic trypsin inhibitor) is an extensively studied model structure. Certain family members are similar to the tick anticoagulant peptide (TAP). This is a highly selective inhibitor of factor Xa in …
C010R085	5740030	0.967517		UNKNOWN
C049R088	5723694	0.965553		UNKNOWN
C254R091	5729914	0.955432		Uncharacterized protein DDB_G0283357	8624043	Q54R73
C154R094	5723516	0.957978	Dpxt	Chorion peroxidase heavy chain	42131	Q9VEG6
C068R095	5727529	0.963429		UNKNOWN
C073R097	5735905	0.954519		UNKNOWN
C219R097	5724609	0.951241		UNKNOWN
C041R101	5722252	0.986167		UNKNOWN
C066R101	5725403	0.980525		UNKNOWN
C084R101	5726199	0.955564		KU, BPTI/Kunitz family of serine protease inhibitors. Serine protease inhibitors. One member of the family is encoded by an alternatively-spliced form of Alzheimers amyloid beta-protein.
C063R104	5725193	0.965563		UNKNOWN
C026R106	5724259	0.961771		UNKNOWN
C077R108	5725952	0.976784		UNKNOWN
C244R108	5723896	0.974792		UNKNOWN
C116R111	5740202	0.957322		UNKNOWN
C052R112	5729485	0.955766		Brain-specific angiogenesis inhibitor 2	230775	Q8CGM1
C196R116	5734734	0.973977	CA-IX	Carbonic anhydrase 9	230099	Q8VHB5
C259R116	5724811	0.96689		UNKNOWN
C138R117	5721986	0.973453		Brain-specific angiogenesis inhibitor 1	107831	Q3UHD1
C137R119	5722107	0.969617		UNKNOWN
C261R120	5729574	0.967255		Cytosolic non-specific dipeptidase	512626	Q3ZC84
C258R121	5731590	0.972799		UNKNOWN
C178R122	5727836	0.957477		UNKNOWN
C057R123	5735844	0.967484		UNKNOWN
C091R125	5722378	0.970025		UNKNOWN
C167R125	5734341	0.953377		Sodium-dependent nutrient amino acid transporter 1	6566079	B4JMC1
C186R125	5724158	0.95156		UNKNOWN
C039R127	5727464	0.957716		UNKNOWN
C049R129	5732585	0.97506		UNKNOWN
C026R132	5727228	0.962903	DmPO	Peroxidase	2768671	Q01603
C101R132	5722743	0.96568		UNKNOWN
C023R133	5730606	0.964011		UNKNOWN
C042R133	5723616	0.975099		Putative uncharacterized protein DDB_G0277255	8620953	Q86K40
C262R133	5726014	0.953905		UNKNOWN
C104R137	5723970	0.961139		UNKNOWN
C149R137	5722253	0.983285		Acidic repeat-containing protein	93953	Q96QF7
C191R137	5735905	0.976417		UNKNOWN
C176R138	5734855	0.967597	Dpxt	Chorion peroxidase heavy chain	42131	Q9VEG6
C163R142	5729947	0.961748	DPP	Dentin sialoprotein	1834	Q9NZW4
C261R144	5730606	0.977666		UNKNOWN
C168R145	5736936	0.950242		UNKNOWN
C214R145	5725406	0.971959		UNKNOWN
C081R146	5732297	0.950711		UNKNOWN
C223R146	5731398	0.962164		Actin		Q92192
C033R147	5723694	0.953085		UNKNOWN
C157R149	5726092	0.952219		UNKNOWN
C203R149	5735608	0.975959		UNKNOWN
C219R149	5729947	0.96835	DPP	Dentin sialoprotein	1834	Q9NZW4
C073R150	5735180	0.954576		UNKNOWN
C134R150	5727281	0.967126		UNKNOWN
C227R153	5727424	0.970906		UNKNOWN
C200R157	5737365	0.973273		UNKNOWN
C061R158	5735959	0.95012		UNKNOWN
C029R159	5723714	0.96409		UNKNOWN
C175R161	5726170	0.968343		UNKNOWN
C204R162	5723714	0.979377		UNKNOWN
C138R163	5732947	0.97005		UNKNOWN
C104R164	5728832	0.977289		UNKNOWN
C055R165	5734782	0.959834		UNKNOWN
C196R168	5734970	0.959111		UNKNOWN
C202R169	5722495	0.966046		UNKNOWN
C130R170	5723951	0.978188		UNKNOWN
C221R002	5735394	0.954516		UNKNOWN
C139R008	5722371	0.959439		UNKNOWN
C065R012	5725516	0.979483		Kunitz/BPTI-like toxin		B5L5M7
C119R014	5735884	0.977189		UNKNOWN
C152R014	5728055	0.95834		Chymotrypsin-like protease CTRL-1	1506	P40313
C193R019	5738202	0.955294		Mucin, Mucin-like glycoprotein. This family of trypanosomal proteins resemble vertebrate mucins. The protein consists of three regions. The N and C terminii are conserved between all members of the family, whereas the central region is not well conserved and contains a large number of threonine residues which can be glycosylated. Indirect evidence suggested that these genes might encode the core …
C260R019	5729922	0.9722		UNKNOWN
C082R020	5727228	0.974965	DmPO	Peroxidase	2768671	Q01603
C264R023	5729955	0.975326	TFPI	Tissue factor pathway inhibitor	613026	Q28864
C167R030	5735172	0.968564		UNKNOWN
C210R033	5727568	0.957205		Protein canopy-1	402819	Q2L6L1
C135R035	5735731	0.971675		UNKNOWN
C097R036	5727102	0.966531		UNKNOWN
C175R036	5722253	0.982379		Acidic repeat-containing protein	93953	Q96QF7
C233R047	5721963	0.971138		Kunitz/BPTI-like toxin		B5L5M7
C031R049	5725231	0.972173		UNKNOWN
C106R052	5725610	0.967941		KU, BPTI/Kunitz family of serine protease inhibitors. Serine protease inhibitors. One member of the family is encoded by an alternatively-spliced form of Alzheimers amyloid beta-protein.
C075R053	5727838	0.963941		UNKNOWN
C094R057	5722775	0.970702		UNKNOWN
C063R066	5728844	0.983249		UNKNOWN
C021R072	5726026	0.953301		Carboxypeptidase B		P04069
C175R072	5729922	0.970531		UNKNOWN
C200R072	5725226	0.958778		UNKNOWN
C263R081	5724591	0.96331		UNKNOWN
C166R087	5734309	0.958078		UNKNOWN
C009R088	5729270	0.958867		Uncharacterized protein DDB_G0283357	8624043	Q54R73
C177R089	5735959	0.955179		UNKNOWN
C107R090	5734309	0.953765		UNKNOWN
C049R091	5734654	0.950416		UNKNOWN
C076R094	5735862	0.956117		UNKNOWN
C218R103	5724255	0.983138		UNKNOWN
C050R104	5735508	0.975654		UNKNOWN
C026R119	5727838	0.959327		UNKNOWN
C153R122	5731315	0.981602		UNKNOWN
C087R123	5728702	0.962191		UNKNOWN
C142R126	5723640	0.959997		UNKNOWN
C156R128	5722378	0.979039		UNKNOWN
C053R129	5735731	0.969571		UNKNOWN
C040R138	5735884	0.967522		UNKNOWN
C072R142	5723951	0.972352		UNKNOWN
C240R144	5732404	0.969904		Serine protease persephone	32832	Q9VWU1
C264R144	5735426	0.970039		UNKNOWN
C192R149	5722507	0.956955		UNKNOWN
C059R150	5726761	0.984641		UNKNOWN
C121R150	5721836	0.959962		Outer dense fiber protein 2-like	733263	Q08B20
C241R152	5724552	0.968823		UNKNOWN
C077R153	5731315	0.978094		UNKNOWN
C218R155	5738202	0.957314		Mucin, Mucin-like glycoprotein. This family of trypanosomal proteins resemble vertebrate mucins. The protein consists of three regions. The N and C terminii are conserved between all members of the family, whereas the central region is not well conserved and contains a large number of threonine residues which can be glycosylated. Indirect evidence suggested that these genes might encode the core …
C199R157	5735354	0.971621		UNKNOWN
C102R158	5727841	0.954199		UNKNOWN
C238R162	5724811	0.971091		UNKNOWN
C099R164	5728857	0.96012		RT_LTR, RT_LTR: Reverse transcriptases (RTs) from retrotransposons and retroviruses which have long terminal repeats (LTRs) in their DNA copies but not in their RNA template. RT catalyzes DNA replication from an RNA template, and is responsible for the replication of retroelements. An RT gene is usually indicative of a mobile element such as a retrotransposon or retrovirus. RTs are present in a v…
C115R164	5738435	0.960578		UNKNOWN
C174R167	5725403	0.971765		UNKNOWN
C130R168	5722099	0.981685		UNKNOWN

## Sheet: Discordant probes g(816)
These transcripts show sex-biased expression in all populations. However, the sex-bias is discordant between populations.
Spot ID	Contig ID	BMA2a (MvF)	BMA2b (MvF)	Pacific (MvF)	Gene	Description	GeneID	SwissProt Accession
C001R107	5731475	-1.58197	2.45396	3.29258		UNKNOWN
C004R052	5736067	-2.60595	18.3686	8.66994		UNKNOWN
C004R057	5728899	-13.3556	3.11647	11.6114		UNKNOWN
C004R108	5727662	-2.30216	4.60948	-1.94269		UDP-N-acetylglucosamine pyrophosphorylase	107652	Q91YN5
C004R128	5723531	-2.72876	-6.27022	13.1768		UNKNOWN
C005R090	5736097	-13.0363	39.4677	19.5734		UNKNOWN
C006R026	5736772	-64.3827	-10.3793	29.481		Chitin_bind_4, Insect cuticle protein. Many insect cuticular proteins include a 35-36 amino acid motif known as the R&R consensus. The extensive conservation of this region led to the suggestion that it functions to bind chitin. Provocatively, it has no sequence similarity to the well-known cysteine-containing chitin-binding domain found in chitinases and some peritrophic membrane proteins. Chiti…
C007R053	5729102	-22.7389	3.57129	32.766		COG5651, PPE-repeat proteins [Cell motility and secretion].
C007R118	5728187	-3.51859	1.93959	4.55175		UNKNOWN
C008R047	5724858	-14.4481	36.3735	28.5463		UNKNOWN
C008R127	5732459	-1.64731	3.22055	1.76243		Tropomyosin-1, isoforms 9A/A/B	41852	P06754
C008R135	5731179	-8.01363	-3.37643	16.1598		Cuticle protein 6		P82119
C009R092	5728759	2.0022	-3.86032	2.93825		UNKNOWN
C009R126	5732820	-20.4498	-20.6233	8.51411		UNKNOWN
C010R132	5729755	-59.9573	2.21861	50.7814		UNKNOWN
C011R041	5727077	-1.66489	1.93649	3.97609		4F5, 4F5 protein family. Members of this family are short proteins that are rich in aspartate, glutamate, lysine and arginine. Although the function of these proteins is unknown, they are found to be ubiquitously expressed.
C011R118	5732536	-1.67794	2.90828	-2.19131	OSBP-related protein 11	Oxysterol-binding protein-related protein 11	114885	Q9BXB4
C011R150	5722266	-4.82471	139.082	8.21691		UNKNOWN
C012R057	5729953	-9.16057	-2.50139	13.6452		UNKNOWN
C012R107	5730528	1.70549	-1.58716	2.15792	CANP 3	Calpain-3	423233	Q92177
C013R013	5730452	-7.66874	17.388	41.7075		UNKNOWN
C013R042	5737140	1.59153	2.28632	-1.50835		UNKNOWN
C013R053	5729090	-3.037	47.8681	13.5829		UNKNOWN
C013R080	5727001	-1.85221	2.5736	12.8794		DOMON domain-containing protein CG14681	3772559	Q9VGY6
C013R106	5731392	-32.3889	2.45416	43.8514		Cuticle protein CP14.6		Q94984
C014R033	5726999	-11.6726	-2.16879	44.558		UNKNOWN
C014R035	5738488	9.88961	1.79278	-79.0957	Dpxt	Chorion peroxidase heavy chain	42131	Q9VEG6
C014R070	5728535	-16.5673	-1.79924	5.05615		UNKNOWN
C014R083	5731165	1.76434	-2.27699	6.42235		UNKNOWN
C014R092	5734750	-2.27127	1.68088	4.11478	AtPIP5K8	Phosphatidylinositol-4-phosphate 5-kinase 8	842381	Q8RY89
C016R070	5722854	-31.6938	3.25524	32.5265		UNKNOWN
C016R097	5738644	-19.1093	3.0413	4.922		UNKNOWN
C017R025	5732770	-12.537	12.4071	47.5609		UNKNOWN
C017R159	5728737	-36.6874	-36.2787	6.46973		UNKNOWN
C018R049	5730384	-38.4229	11.6193	34.5384		UNKNOWN
C018R053	5726721	-3.48514	5.2024	12.7791		Bumetanide-sensitive sodium-(potassium)-chloride cotransporter		Q25479
C019R024	5727028	1.88879	-1.58219	-2.7878		Histone H2B		P21897
C019R067	5728149	-1.91474	-3.92298	2.17252		UNKNOWN
C019R076	5725145	-28.8957	-6.81738	16.66		UNKNOWN
C019R148	5736253	-39.1453	3.75883	42.7991		UNKNOWN
C020R024	5733335	-1.68565	2.40143	11.3157		DOMON domain-containing protein CG14681	3772559	Q9VGY6
C020R030	5726079	-2.91381	9.38956	-2.20435		Dual oxidase	33477	Q9VQH2
C020R057	5729070	-2.04634	1.64002	15.7487		UNKNOWN
C020R119	5723426	-1.55366	-1.94613	1.75126		rRNA 2-O-methyltransferase fibrillarin	6547316	Q8I1F4
C020R126	5725323	1.85939	-4.65792	3.29517		UNKNOWN
C020R131	5722843	-1.75861	1.61454	-9.53633		AN1-type zinc finger protein 2B	130617	Q8WV99
C021R039	5727416	-141.099	4.12159	31.4268		UNKNOWN
C021R061	5737158	1.74461	2.14523	-1.51702		UNKNOWN
C021R132	5724288	-1.63295	1.54994	-2.06743	Katanin p80 subunit B1	Katanin p80 WD40-containing subunit B1	373369	O61585
C023R013	5732382	-9.76128	3.3533	8.59381		Peroxidasin	38326	Q9VZZ4
C023R144	5724101	2.38625	1.94207	-4.49071	GLS	Glutaminase liver isoform, mitochondrial	192268	P28492
C023R158	5723871	-17.6673	128.401	46.3628		UNKNOWN
C023R159	5727884	3.53521	-2.03705	-2.60778		UNKNOWN
C024R032	5737186	-4.13389	-2.80066	120.303		UNKNOWN
C024R103	5733667	-85.2865	-2.06544	13.4947		UNKNOWN
C024R164	5727273	-4.04416	2.14327	3.56812	PDI	Protein disulfide-isomerase	39651	P54399
C026R088	5727802	-8.40284	2.34618	26.8073		ATG13, Autophagy-related protein 13. Members of this family of phosphoproteins are involved in cytoplasm to vacuole transport (Cvt), and more specifically in Cvt vesicle formation. They are probably involved in the switching machinery regulating the conversion between the Cvt pathway and autophagy. Finally, ATG13 is also required for glycogen storage.
C027R001	5729950	-13.4233	35.6616	18.9842		UNKNOWN
C027R005	5730449	-24.4434	-9.73387	13.7531		UNKNOWN
C027R077	5725531	1.56445	-1.9324	2.73265		UNKNOWN
C027R101	5722376	2.5009	-7.19282	2.91725		UNKNOWN
C027R116	5726322	-1.90442	1.79886	3.2256		Putative epidermal cell surface receptor	40861	Q04164
C027R148	5727669	2.6019	-2.54675	4.34704		ANK, ankyrin repeats; ankyrin repeats mediate protein-protein interactions in very diverse families of proteins. The number of ANK repeats in a protein can range from 2 to over 20 (ankyrins, for example). ANK repeats may occur in combinations with other types of domains. The structural repeat unit contains two antiparallel helices and a beta-hairpin, repeats are stacked in a superhelical arrangem…
C028R008	5732613	2.55927	-1.96344	-78.7349		UNKNOWN
C028R112	5735472	-6.97028	18.5593	14.6661		UNKNOWN
C029R015	5728160	-17.0771	1.63741	7.2947		UNKNOWN
C029R095	5725076	-2.26146	7.85188	11.8535		UNKNOWN
C030R072	5728149	-1.87921	-4.1482	2.33811		UNKNOWN
C030R163	5731299	-10.1791	2.79151	4.74057		UNKNOWN
C031R044	5724474	1.76689	-2.3424	7.22509		UNKNOWN
C031R107	5723793	1.56376	-2.79844	2.07824		UNKNOWN
C031R135	5726146	-3.17932	58.5913	10.6998		UNKNOWN
C032R028	5728768	-28.3667	16.4383	115.997		UNKNOWN
C032R167	5722051	-21.6018	71.9722	23.93		UNKNOWN
C033R041	5734011	-24.6475	8.58154	8.84323		UNKNOWN
C033R079	5731287	-4.0554	2.41156	4.74233		UNKNOWN
C033R112	5730274	-24.6687	23.2188	19.0732		UNKNOWN
C034R030	5726593	-1.60259	2.18325	4.66612		Olfactomedin-like protein 2A	100125057	A4IIT5
C034R072	5732366	5.81876	-3.25737	-4.11146		Putative ascorbate peroxidase		Q539E5
C034R105	5729558	-9.07652	-2.01473	42.2044		UNKNOWN
C035R066	5740820	-1.61012	-1.51073	5.97773		Collagen, Collagen triple helix repeat (20 copies). Members of this family belong to the collagen superfamily. Collagens are generally extracellular structural proteins involved in formation of connective tissue structure. The alignment contains 20 copies of the G-X-Y repeat that forms a triple helix. The first position of the repeat is glycine, the second and third positions can be any residue b…
C035R091	5730003	5.54663	-2.11747	-3.10009		60S ribosomal protein L29	507270	Q58DW3
C035R140	5733393	-16.2225	5.49004	10.9794		LDLa, Low Density Lipoprotein Receptor Class A domain, a cysteine-rich repeat that plays a central role in mammalian cholesterol metabolism; the receptor protein binds LDL and transports it into cells by endocytosis; 7 successive cysteine-rich repeats of about 40 amino acids are present in the N-terminal of this multidomain membrane protein; other homologous domains occur in related receptors, in…
C035R159	5727829	3.67949	-2.36269	18.0142		UNKNOWN
C036R042	5724798	-3.96847	-8.63293	50.1371		UNKNOWN
C036R050	5728438	84.5403	-3.14357	-4.19162		UNKNOWN
C036R057	5733415	-14.2962	3.05586	11.0789		UNKNOWN
C036R102	5730160	37.0151	-2.49908	-6.16484		PHA00370, attachment protein.
C036R109	5732130	-1.6927	-3.3856	3.75096		UNKNOWN
C036R122	5729917	-5.07347	2.50761	18.0322		ATG13, Autophagy-related protein 13. Members of this family of phosphoproteins are involved in cytoplasm to vacuole transport (Cvt), and more specifically in Cvt vesicle formation. They are probably involved in the switching machinery regulating the conversion between the Cvt pathway and autophagy. Finally, ATG13 is also required for glycogen storage.
C037R166	5722914	2.04887	1.9111	-2.20949		UNKNOWN
C038R036	5731568	-2.66162	4.18224	-2.47683		Uncharacterized protein C05D11.1	175914	P48053
C038R103	5727820	-1.79849	2.68824	5.7687	Guanosine monophosphate reductase 1	GMP reductase 1	66355	Q9DCZ1
C039R030	5730541	2.88142	-2.68576	-2.73313	MMP-9	Matrix metalloproteinase-9	17395	P41245
C040R001	5731452	-7.46471	3.23516	18.82		UNKNOWN
C040R048	5731306	-2.12096	3.35795	5.35501	KSST	Carbohydrate sulfotransferase 1	445124	Q6DBY9
C040R143	5726594	-3.46112	-4.20648	9.63165		UNKNOWN
C041R014	5733667	-110.997	-1.97168	13.7704		UNKNOWN
C041R038	5731360	-3.57864	-5.76564	2.70696		UNKNOWN
C041R049	5727669	2.54917	-2.60532	4.04012		ANK, ankyrin repeats; ankyrin repeats mediate protein-protein interactions in very diverse families of proteins. The number of ANK repeats in a protein can range from 2 to over 20 (ankyrins, for example). ANK repeats may occur in combinations with other types of domains. The structural repeat unit contains two antiparallel helices and a beta-hairpin, repeats are stacked in a superhelical arrangem…
C041R132	5730540	-1.71583	-2.13894	3.88568		Probable pyridoxine biosynthesis SNZERR		Q8WPW2
C042R065	5724801	-1.98798	2.71107	5.67991		UNKNOWN
C042R124	5731185	-25.0602	-3.34874	78.6797		UNKNOWN
C043R023	5722266	-27.1631	71.1883	29.1701		UNKNOWN
C044R046	5722043	-14.614	1.90558	17.1677		UNKNOWN
C044R140	5728843	-1.77428	2.68562	6.15404	Guanosine monophosphate reductase	Probable GMP reductase	178834	O16294
C045R019	5723653	-1.50065	1.7044	6.07464		UNKNOWN
C045R060	5729682	-6.16758	179.687	18.5436		UNKNOWN
C046R023	5736643	-1.67043	2.01496	-19.0416	GLUT-8	Solute carrier family 2, facilitated glucose transporter member 8	282867	P58354
C046R112	5730449	-42.8624	-10.4928	12.918		UNKNOWN
C047R113	5728909	-2.64472	-2.04239	2.76218	E(spl)mgamma	Enhancer of split mgamma protein	43151	Q01070
C048R010	5722573	-2.18593	-1.97226	3.05579	E(spl)mbeta	Enhancer of split mbeta protein	43152	Q01069
C048R089	5730389	-1.86496	-2.42365	13.0381		UNKNOWN
C048R163	5730425	5.57634	-2.26744	-7.45441	MMP-9	Matrix metalloproteinase-9		O18733
C049R044	5722609	2.07713	-4.50621	7.19945		UNKNOWN
C049R082	5734184	-5.11353	3.20446	14.8489		UNKNOWN
C049R119	5737372	1.95874	-1.50206	2.1736		UNKNOWN
C049R124	5727882	-1.61304	-2.63018	2.90319		UNKNOWN
C050R016	5729935	-1.89132	2.65129	2.17672	UNC-45B	Protein unc-45 homolog B	146862	Q8IWX7
C050R037	5724260	-26.0832	-2.64564	52.7344		UNKNOWN
C051R119	5725622	1.82096	1.53953	-1.62968		Transaldolase	21351	Q93092
C052R052	5736907	-16.3263	-4.4445	18.0618		UNKNOWN
C052R167	5724819	51.3088	-1.96555	-3.61152		UNKNOWN
C053R012	5732679	4.25397	-1.785	8.71865	MMP-9	Matrix metalloproteinase-9	81687	P50282
C053R016	5732275	-3.51962	-1.54685	2.83631	DHPase	Dihydropyrimidinase	1807	Q14117
C054R026	5738574	1.81606	2.13367	-2.28997	AOE37-2	Peroxiredoxin-4	10549	Q13162
C054R144	5723301	-13.9204	69.4018	25.9963		UNKNOWN
C055R111	5727221	-8.00276	42.186	15.5325		UNKNOWN
C055R140	5731287	-7.78211	2.97093	6.58867		UNKNOWN
C056R092	5731569	-1.89427	11.0927	6.2658		UNKNOWN
C056R124	5737062	2.09038	-10.3346	3.49305		UNKNOWN
C056R167	5733176	-2.82844	-3.71931	34.3657		GRP, Glycine rich protein family. This family of proteins includes several glycine rich proteins as well as two nodulins 16 and 24. The family also contains proteins that are induced in response to various stresses.
C057R008	5724987	-1.76435	29.7562	7.51346		UNKNOWN
C057R091	5734672	2.78912	-1.7954	-2.101		Glutathione S-transferase 1, isoform D	1273988	Q93113
C057R114	5733123	-1.51935	1.5217	1.80502		Tubulin beta chain		P11833
C057R121	5724446	-16.1455	-3.18912	97.9067		UNKNOWN
C058R010	5726737	-12.5717	22.7145	29.3069		UNKNOWN
C058R094	5735818	-2.01114	3.30694	-15.9022		UNKNOWN
C058R168	5725670	-2.93707	3.25092	7.24856		UNKNOWN
C059R030	5725670	-3.15108	2.9225	7.42973		UNKNOWN
C059R083	5723161	-3.31774	77.8889	21.0504		Lectin_C, Lectin C-type domain. This family includes both long and short form C-type.
C059R157	5734998	-3.77925	33.7389	9.93596	TESSP-1	Testis serine protease 1	71003	Q920S2
C059R169	5726844	-5.1842	3.02246	10.4691		ChtBD2, Chitin-binding domain type 2.
C060R142	5724506	-1.63202	1.82776	2.42794	ABP-280	Filamin-A	192176	Q8BTM8
C061R035	5727479	-7.35247	-26.0265	10.4993		PRK07003, DNA polymerase III subunits gamma and tau; Validated.
C061R119	5721969	2.57476	-1.89857	5.38946		ANK, ankyrin repeats; ankyrin repeats mediate protein-protein interactions in very diverse families of proteins. The number of ANK repeats in a protein can range from 2 to over 20 (ankyrins, for example). ANK repeats may occur in combinations with other types of domains. The structural repeat unit contains two antiparallel helices and a beta-hairpin, repeats are stacked in a superhelical arrangem…
C061R134	5735535	-6.22553	22.9317	13.1945		PRK07764, DNA polymerase III subunits gamma and tau; Validated.
C062R036	5721995	-4.21403	3.49965	26.872		UNKNOWN
C062R071	5739360	-3.80158	56.2581	9.11007		PRK12323, DNA polymerase III subunits gamma and tau; Provisional.
C062R093	5731323	-3.50921	-2.77309	3.14884		UNKNOWN
C062R102	5722065	-11.63	1.69815	17.741		UNKNOWN
C062R109	5726367	-1.75965	5.84904	9.23551		Protein msta, isoform A	31200	O46040
C062R154	5729558	-9.63928	-1.96867	42.2425		UNKNOWN
C063R016	5730397	-2.59517	-5.67126	5.13293		UNKNOWN
C063R068	5730885	-1.63173	-1.53739	6.20396		Collagen alpha-2(IV) chain	181708	P17140
C064R001	5726535	-3.56459	1.89064	8.30093		ZP, Zona pellucida (ZP) domain. ZP proteins are responsible for sperm-adhesion fo the zona pellucida. ZP domains are also present in multidomain transmembrane proteins such as glycoprotein GP2, uromodulin and TGF-beta receptor type III (betaglycan).
C065R057	5739819	-9.25633	-13.4744	21.5295		UNKNOWN
C065R119	5722241	-3.71904	13.6965	13.3834		UNKNOWN
C065R165	5731343	-8.84645	-1.72846	62.7738		UNKNOWN
C066R072	5727088	-1.5667	-1.97248	2.07528		UNKNOWN
C067R019	5738011	-5.4756	1.63602	16.3008		UNKNOWN
C067R043	5733659	1.63834	-1.51554	1.83526		Myosin-VI	395487	Q9I8D1
C067R157	5729702	37.2054	-1.93177	-6.71693	RALDH 1	Retinal dehydrogenase 1		Q8MI17
C068R008	5725076	-2.19195	7.97285	10.3059		UNKNOWN
C068R101	5725523	-1.95309	2.9606	1.81488		RRP15-like protein	51018	Q9Y3B9
C068R135	5722901	-3.49583	1.81435	20.2518		UNKNOWN
C069R056	5722188	-26.8368	-2.40849	103.709		UNKNOWN
C069R088	5729605	-2.41237	1.70136	3.14415		UNKNOWN
C069R124	5729337	-1.87611	62.1483	4.96117		Glutenin_hmw, High molecular weight glutenin subunit. Members of this family include high molecular weight subunits of glutenin. This group of gluten proteins is thought to be largely responsible for the elastic properties of gluten, and hence, doughs. Indeed, glutenin high molecular weight subunits are classified as elastomeric proteins, because the glutenin network can withstand significant def…
C069R144	5738623	-5.90431	4.74248	5.77506		UNKNOWN
C069R169	5735052	1.92178	1.81511	-2.68828		UNKNOWN
C070R038	5726277	-25.1657	5.58732	12.7272		UNKNOWN
C071R043	5723906	-2.65057	12.1765	6.71256		UNKNOWN
C071R085	5727492	-16.0882	21.0246	25.7891		Atrophin-1, Atrophin-1 family. Atrophin-1 is the protein product of the dentatorubral-pallidoluysian atrophy (DRPLA) gene. DRPLA OMIM:125370 is a progressive neurodegenerative disorder. It is caused by the expansion of a CAG repeat in the DRPLA gene on chromosome 12p. This results in an extended polyglutamine region in atrophin-1, that is thought to confer toxicity to the protein, possibly throug…
C072R007	5726124	1.70621	-1.95769	1.88171		UNKNOWN
C072R026	5726874	2.14327	1.6647	-1.51231		F-box/LRR-repeat protein 5	496483	Q5XGI3
C072R027	5728917	-1.63348	-1.82022	8.72713		UNKNOWN
C072R095	5726277	-23.1255	5.3365	15.6157		UNKNOWN
C073R018	5732062	-11.5233	21.3397	45.8616		UNKNOWN
C073R079	5729075	-1.6912	3.04408	-2.49985		UNKNOWN
C073R148	5731116	-7.42209	-1.82641	39.7952		UNKNOWN
C073R167	5723771	-5.2075	2.86915	16.1608		UNKNOWN
C074R019	5723502	-13.9738	27.1683	18.5774		UNKNOWN
C075R003	5729541	-3.56573	2.05356	6.10206		UNKNOWN
C075R040	5738029	-1.73053	3.12555	-2.05009	Na(+)/K(+) ATPase alpha subunit	Sodium/potassium-transporting ATPase subunit alpha		P13607
C076R034	5729070	-3.40653	1.68373	15.2301		UNKNOWN
C076R163	5733735	1.81556	-1.69467	3.58765		J domain-containing protein	692566	Q9U6V7
C077R044	5727899	-3.98376	-5.77997	69.8828		UNKNOWN
C077R056	5731568	-3.28517	4.63515	-2.99681		Uncharacterized protein C05D11.1	175914	P48053
C077R124	5723414	-15.0432	4.80208	60.4626		Small proline-rich protein 3	100009219	Q28658
C078R132	5739359	-33.0531	3.44686	37.311		UNKNOWN
C078R160	5726326	-3.29816	15.5878	18.672		Long-chain-fatty-acid--CoA ligase ACSBG2	328845	Q2XU92
C079R040	5727063	-25.4203	-6.06219	4.80288		UNKNOWN
C080R009	5739307	-1.55183	2.03006	-10.9786		ABC transporter G family member 20	8616035	Q8T674
C080R153	5726255	-33.9467	17.6831	65.2067		UNKNOWN
C081R083	5727143	-10.4661	-2.79299	8.47043		UNKNOWN
C081R120	5722868	-3.98326	3.53036	24.9929		UNKNOWN
C082R033	5731098	-2.71308	2.90048	-24.2254		UNKNOWN
C082R074	5735472	-7.42961	21.7055	14.7827		UNKNOWN
C082R110	5736334	-7.28502	-2.64051	12.5314		UNKNOWN
C082R153	5730595	-34.0159	3.48938	42.4264		UNKNOWN
C082R156	5723161	-3.17109	59.8949	16.7566		Lectin_C, Lectin C-type domain. This family includes both long and short form C-type.
C083R070	5729869	-5.74302	76.8912	30.0652		UNKNOWN
C083R098	5728759	2.02504	-9.41505	3.90284		UNKNOWN
C083R110	5737567	-1.56576	1.79552	3.36635		UNKNOWN
C083R111	5737217	-9.57726	-3.96964	14.1208		Cuticle protein 6		P82119
C083R169	5731578	2.22191	-9.66733	2.19859		UNKNOWN
C084R060	5733238	-177.365	-16.03	8.64203		Cuticle protein 21		P81225
C084R110	5740677	1.87348	2.03063	-3.96364	Laman	Lysosomal alpha-mannosidase E peptide	282272	Q29451
C084R120	5724798	-3.85532	-5.7418	58.9436		UNKNOWN
C084R141	5735536	-5.85757	2.86855	11.4375		Chitin_bind_4, Insect cuticle protein. Many insect cuticular proteins include a 35-36 amino acid motif known as the R&R consensus. The extensive conservation of this region led to the suggestion that it functions to bind chitin. Provocatively, it has no sequence similarity to the well-known cysteine-containing chitin-binding domain found in chitinases and some peritrophic membrane proteins. Chiti…
C085R031	5726516	-35.6122	1.9635	74.8115		UNKNOWN
C085R060	5723481	-10.2186	13.5599	4.42415		Kelch-like protein 34	257240	Q8N239
C085R114	5723766	-35.1592	2.64672	20.2117		UNKNOWN
C085R120	5734219	-1.55103	-7.89706	5.40433		UNKNOWN
C086R083	5722224	-47.6	24.5503	49.4692		UNKNOWN
C086R158	5731537	2.28894	2.34893	-4.54329		Elongation of very long chain fatty acids protein AAEL008004	5569887	Q1HRV8
C087R071	5729106	-1.75155	-2.03058	6.23411		UNKNOWN
C087R130	5723699	-5.138	2.87609	11.5377		UNKNOWN
C087R150	5733176	-2.88848	-4.15436	32.1367		GRP, Glycine rich protein family. This family of proteins includes several glycine rich proteins as well as two nodulins 16 and 24. The family also contains proteins that are induced in response to various stresses.
C088R075	5725384	-4.06687	3.03067	5.69425		Chitin_bind_4, Insect cuticle protein. Many insect cuticular proteins include a 35-36 amino acid motif known as the R&R consensus. The extensive conservation of this region led to the suggestion that it functions to bind chitin. Provocatively, it has no sequence similarity to the well-known cysteine-containing chitin-binding domain found in chitinases and some peritrophic membrane proteins. Chiti…
C088R099	5727143	-11.4675	-3.0329	16.0936		UNKNOWN
C089R029	5740161	1.67044	-1.91913	3.50438		Calmodulin-like protein 4	91860	Q96GE6
C089R086	5728123	-57.0137	14.6343	10.993		UNKNOWN
C089R111	5723090	-7.76285	21.5326	12.9014		UNKNOWN
C089R116	5740161	1.81402	-1.88502	2.73131		Calmodulin-like protein 4	91860	Q96GE6
C089R129	5726310	-1.55283	-1.84466	9.76717		UNKNOWN
C090R012	5730473	-8.78072	-2.07888	25.0085		UNKNOWN
C090R018	5738524	-15.6476	1.77456	-6.5441		Uncharacterized protein K02A2.6		Q09575
C090R039	5729480	-3.64137	-5.91356	2.62881		GRP, Glycine rich protein family. This family of proteins includes several glycine rich proteins as well as two nodulins 16 and 24. The family also contains proteins that are induced in response to various stresses.
C090R103	5726744	-26.1121	-59.1411	10.2673		UNKNOWN
C090R133	5725874	-2.22918	1.6834	8.25774		UNKNOWN
C091R157	5723365	-5.92983	-3.80396	16.4425		UNKNOWN
C091R165	5735639	-8.84534	2.09728	12.2639		UNKNOWN
C092R065	5726883	-6.12892	-4.67986	2.34778		E3 ubiquitin-protein ligase RNF34	282845	Q6AYH3
C092R070	5726535	-4.27706	2.45709	8.66006		ZP, Zona pellucida (ZP) domain. ZP proteins are responsible for sperm-adhesion fo the zona pellucida. ZP domains are also present in multidomain transmembrane proteins such as glycoprotein GP2, uromodulin and TGF-beta receptor type III (betaglycan).
C092R138	5726848	-3.98808	2.1124	15.1327		Candida_ALS, Candida agglutinin-like protein (ALS). This family consists of several agglutinin-like proteins from different Candida species. ALS genes of Candida albicans encode a family of cell-surface glycoproteins with a three-domain structure. Each Als protein has a relatively conserved N-terminal domain, a central domain consisting of a tandemly repeated motif, and a serine-threonine-rich C-…
C093R026	5726809	-13.529	2.82263	12.6727		UNKNOWN
C093R129	5725034	-1.58332	-1.79286	7.38025		Collagen alpha-2(IV) chain		P27393
C094R017	5731443	-19.6631	4.07117	34.7624		COG5651, PPE-repeat proteins [Cell motility and secretion].
C094R129	5732312	1.99741	1.71054	-2.89007	Laman	Lysosomal alpha-mannosidase		Q60HE9
C094R154	5738389	-2.33008	3.24126	-26.676	eIF4E-1A	Eukaryotic translation initiation factor 4E-1A	79380	Q9DFS6
C095R011	5735736	-4.16082	14.0653	6.42062		Glutenin_hmw, High molecular weight glutenin subunit. Members of this family include high molecular weight subunits of glutenin. This group of gluten proteins is thought to be largely responsible for the elastic properties of gluten, and hence, doughs. Indeed, glutenin high molecular weight subunits are classified as elastomeric proteins, because the glutenin network can withstand significant def…
C095R084	5730488	-8.76862	1.75358	9.44757		Polysacc_deac_1, Polysaccharide deacetylase. This domain is found in polysaccharide deacetylase. This family of polysaccharide deacetylases includes NodB (nodulation protein B from Rhizobium) which is a chitooligosaccharide deacetylase. It also includes chitin deacetylase from yeast, and endoxylanases which hydrolyses glucosidic bonds in xylan.
C095R090	5728516	-2.18257	6.54102	4.85551		UNKNOWN
C095R101	5725053	2.56582	-1.61613	1.99112		UNKNOWN
C096R022	5725655	-2.82387	-5.38509	10.4938		UNKNOWN
C096R032	5729018	1.79043	2.68483	-1.5061		Probable E3 ubiquitin-protein ligase makorin-1	777952	Q5NU14
C096R040	5732493	-5.72514	-9.92153	77.7016		UNKNOWN
C096R118	5733335	-1.83731	2.60856	13.0106		DOMON domain-containing protein CG14681	3772559	Q9VGY6
C096R132	5728203	-12.877	44.3402	13.2297		UNKNOWN
C097R052	5736905	1.89966	-1.51173	2.23		UNKNOWN
C097R071	5727304	1.519	1.52928	-1.77127	SRB1	Scavenger receptor class B member 1	20778	Q61009
C097R083	5732958	-2.47737	20.497	7.3597		UNKNOWN
C097R094	5727834	-1.93108	2.03708	7.21847		UNKNOWN
C097R114	5727416	-77.3902	5.26216	36.5309		UNKNOWN
C097R135	5725364	-8.24762	5.60935	15.8728		DOMON domain-containing protein CG14681	3772559	Q9VGY6
C097R154	5723609	-2.01618	3.14474	2.15169	MAJN	Myosin-XVIIIa		Q9JMH9
C097R160	5725534	-95.1269	-2.49641	14.5608		UNKNOWN
C098R031	5730275	-12.1721	-4.32473	17.1662		UNKNOWN
C098R088	5722486	-27.2258	2.31589	33.2183		UNKNOWN
C098R095	5730473	-13.0078	-3.48687	18.7891		UNKNOWN
C099R045	5728019	-6.25366	28.8408	30.5249		UNKNOWN
C099R062	5722868	-3.72963	3.28513	14.3848		UNKNOWN
C099R130	5728329	1.98983	-9.3452	1.90093		UNKNOWN
C100R002	5732233	29.6649	-8.43157	-4.10632		UNKNOWN
C100R038	5723506	-1.94367	-2.44546	2.04077		UNKNOWN
C100R057	5728012	-41.5299	-48.4193	9.2244		UNKNOWN
C100R090	5733127	1.59547	1.50587	-1.57048	HAD	3-hydroxyanthranilate 3,4-dioxygenase	56823	P46953
C101R113	5723426	-2.09236	-1.97593	1.84889		rRNA 2-O-methyltransferase fibrillarin	6547316	Q8I1F4
C101R134	5728049	2.67481	-2.53544	3.97176		UNKNOWN
C102R016	5726200	-8.46767	3.72018	10.2307		ChtBD2, Chitin-binding domain type 2.
C102R117	5727616	-2.06981	2.37467	-2.20698		UNKNOWN
C102R142	5733273	-25.7875	9.6167	40.8971		Aldose 1-epimerase	616676	Q5EA79
C103R139	5736072	-1.89061	1.78842	12.9756		UNKNOWN
C103R168	5725145	-31.7554	-7.06162	17.9004		UNKNOWN
C104R049	5723845	-7.53174	5.27692	16.7508		DOMON domain-containing protein CG14681	3772559	Q9VGY6
C105R051	5730482	-1.69869	-2.66277	2.5789		UNKNOWN
C105R088	5731459	-12.6777	4.29864	19.6045		UNKNOWN
C105R090	5730996	-10.1815	-2.67802	8.54211		UNKNOWN
C105R135	5738316	-6.00745	14.2744	13.5827		P17/29C-like protein DDB_G0287399	8626120	Q54KD5
C105R159	5725848	3.4258	-1.81261	1.79252		NADPH oxidase 5	79400	Q96PH1
C106R062	5732493	-4.92977	-7.1174	74.9807		UNKNOWN
C106R134	5735500	-4.18071	27.3629	21.6041		UNKNOWN
C107R114	5725655	-2.96551	-6.61798	14.1445		UNKNOWN
C108R042	5726582	-2.09823	3.71755	3.88921		UNKNOWN
C108R098	5735673	-29.5644	10.9628	81.1829		UNKNOWN
C108R144	5727185	-2.61116	8.43089	4.40235		UNKNOWN
C109R001	5732613	2.66744	-2.09404	-63.1576		UNKNOWN
C109R045	5728281	2.68084	3.17334	-2.90549	GPx-2	Glutathione peroxidase 2		Q4AEI0
C109R087	5727085	-4.21154	27.8791	12.8248		UNKNOWN
C109R136	5731248	-3.23746	14.6432	14.2981		UNKNOWN
C109R144	5733480	-7.5363	-27.3395	11.2295	NA	Sialidase		P23253
C110R015	5734153	1.61083	1.9359	-1.99398		UNKNOWN
C110R065	5732312	2.16271	1.95644	-2.99118	Laman	Lysosomal alpha-mannosidase		Q60HE9
C110R110	5735149	-10.5411	2.99195	-9.28337		UNKNOWN
C110R116	5723288	-1.84666	-2.15649	5.1115		Probable pyridoxine biosynthesis SNZERR		Q8WPW2
C110R137	5723013	-2.9745	-3.39863	7.36505		UNKNOWN
C111R156	5736772	-53.3301	-8.39292	29.4389		Chitin_bind_4, Insect cuticle protein. Many insect cuticular proteins include a 35-36 amino acid motif known as the R&R consensus. The extensive conservation of this region led to the suggestion that it functions to bind chitin. Provocatively, it has no sequence similarity to the well-known cysteine-containing chitin-binding domain found in chitinases and some peritrophic membrane proteins. Chiti…
C112R011	5726435	-7.01831	4.53922	7.04731		UNKNOWN
C112R112	5722224	-28.7922	12.9652	65.9395		UNKNOWN
C113R069	5735111	-11.9119	4.36089	35.8974	EKLF	Krueppel-like factor 1	10661	Q13351
C113R097	5725584	-2.54285	2.18345	3.62711		UNKNOWN
C113R114	5723414	-41.3402	3.62189	88.0617		Small proline-rich protein 3	100009219	Q28658
C115R049	5730996	-11.9604	-3.13654	17.135		UNKNOWN
C115R082	5723845	-7.11665	7.42351	19.0963		DOMON domain-containing protein CG14681	3772559	Q9VGY6
C116R022	5722412	-2.1417	3.22572	4.73803	IL-16	Interleukin-16	16170	O54824
C116R063	5727820	-1.86864	2.91949	5.8928	Guanosine monophosphate reductase 1	GMP reductase 1	66355	Q9DCZ1
C116R067	5723109	-30.0552	5.09087	29.0601		UNKNOWN
C117R067	5732064	-3.60288	2.46828	12.1553		UNKNOWN
C117R106	5726315	-3.01688	18.0569	12.7626		UNKNOWN
C117R126	5726891	2.10207	-10.5612	2.13117		UNKNOWN
C117R135	5723653	-1.51204	1.95218	5.32605		UNKNOWN
C118R040	5733583	-4.09735	5.82447	9.64372		UNKNOWN
C118R077	5735535	-4.30035	20.2071	9.2311		PRK07764, DNA polymerase III subunits gamma and tau; Validated.
C118R163	5729860	-3.76198	40.9008	12.357		UNKNOWN
C119R011	5722098	-2.03321	-2.57038	2.00921		UNKNOWN
C119R037	5729631	-3.0042	38.2713	10.8822		UNKNOWN
C119R038	5723017	-30.0385	6.19522	69.8782		UNKNOWN
C119R089	5740447	8.47212	-2.17717	-36.0067		UNKNOWN
C119R158	5732097	-6.09787	5.05055	4.45651		UNKNOWN
C120R011	5730275	-11.5066	-4.40912	15.7944		UNKNOWN
C120R022	5726632	-1.62853	3.55589	1.75959		Tropomyosin-1, isoforms 9A/A/B	41852	P06754
C120R049	5726072	-3.70903	-7.9024	53.1792		UNKNOWN
C120R061	5739389	1.80594	-1.55989	2.42296		Dynein heavy chain 6, axonemal		Q9C0G6
C120R072	5731598	-1.5766	3.02484	6.08441	TESSP-1	Testis serine protease 1	71003	Q920S2
C120R135	5728261	-25.3201	-2.28574	47.6562		UNKNOWN
C121R006	5726115	-2.27079	-4.23273	3.4265	TnI	Troponin I		P05547
C121R051	5727613	-5.97799	117.924	12.7666		UNKNOWN
C121R073	5722885	-2.75915	2.00189	-6.91794		WD repeat-containing protein 59	319481	Q8C0M0
C121R079	5735811	-4.227	-1.58757	3.57822		Dihydropyrimidinase 2	8575752	Q61YQ1
C121R084	5723393	-321.282	-10.375	6.27843		UNKNOWN
C121R122	5728191	-6.57722	67.0679	10.4933		Lectin_C, Lectin C-type domain. This family includes both long and short form C-type.
C121R129	5723531	-5.58154	-4.82685	13.0468		UNKNOWN
C122R035	5733263	-1.63307	2.87757	-8.85133	NADP-ME	NADP-dependent malic enzyme		P28227
C122R085	5726994	-2.93656	-5.31244	14.4385		UNKNOWN
C122R108	5729716	-1.64779	2.90117	4.67739	IL-16	Interleukin-16	3603	Q14005
C122R147	5725534	-229.97	-2.34838	8.01701		UNKNOWN
C123R010	5733480	-5.93252	-8.43004	12.1309	NA	Sialidase		P23253
C123R026	5733388	-20.7288	-61.3738	9.36438		UNKNOWN
C123R050	5737270	-100.783	11.8536	45.9805		UNKNOWN
C123R152	5737331	-2.07587	14.0991	3.06022	h-warts	Serine/threonine-protein kinase LATS1	9113	O95835
C124R037	5733502	-9.39094	-1.84246	7.97032		UNKNOWN
C124R067	5722148	-22.3834	2.31072	18.2826		ChtBD2, Chitin-binding domain type 2.
C124R132	5726778	-4.2002	22.8124	11.6261		UNKNOWN
C124R138	5733502	-5.14117	-1.54483	3.25296		UNKNOWN
C124R143	5730595	-34.6831	3.28918	38.0281		UNKNOWN
C124R166	5722573	-1.89461	-1.76362	2.98342	E(spl)mbeta	Enhancer of split mbeta protein	43152	Q01069
C125R022	5727834	-1.95832	2.68726	7.7208		UNKNOWN
C125R041	5727614	1.54301	-1.54799	2.19432		Programmed cell death 6-interacting protein	501083	Q9QZA2
C125R099	5725154	-4.58117	77.1082	18.5667		UNKNOWN
C125R101	5731301	-10.2416	3.83677	15.4479		UNKNOWN
C125R107	5729883	-23.6559	2.0683	21.0838		ChtBD2, Chitin-binding domain type 2.
C125R110	5737038	25.6987	-2.19096	-24.2087		ZnMc_astacin_like, Zinc-dependent metalloprotease, astacin_like subfamily or peptidase family M12A, a group of zinc-dependent proteolytic enzymes with a HExxH zinc-binding site/active site. Members of this family may have an amino terminal propeptide, which is cleaved to yield the active protease domain, which is consequently always found at the N-terminus in multi-domain architectures. This fami…
C126R014	5723910	2.56018	-1.82369	4.19685		ANK, ankyrin repeats; ankyrin repeats mediate protein-protein interactions in very diverse families of proteins. The number of ANK repeats in a protein can range from 2 to over 20 (ankyrins, for example). ANK repeats may occur in combinations with other types of domains. The structural repeat unit contains two antiparallel helices and a beta-hairpin, repeats are stacked in a superhelical arrangem…
C126R050	5726397	-2.09726	-1.72444	5.03997		UNKNOWN
C126R107	5731160	-31.4884	-4.45185	75.3722		Glutenin_hmw, High molecular weight glutenin subunit. Members of this family include high molecular weight subunits of glutenin. This group of gluten proteins is thought to be largely responsible for the elastic properties of gluten, and hence, doughs. Indeed, glutenin high molecular weight subunits are classified as elastomeric proteins, because the glutenin network can withstand significant def…
C126R132	5721827	-15.726	2.23233	31.1066	AMCase	Acidic mammalian chitinase	282645	Q95M17
C126R168	5737106	-21.9626	-10.1576	25.6621		Cuticle protein 6		P82119
C127R073	5729830	-1.97906	-2.7331	3.12243		UNKNOWN
C127R102	5730565	-29.1142	1.80054	73.45		Adhesive plaque matrix protein		Q25434
C127R123	5728737	-42.4512	-46.1424	8.25928		UNKNOWN
C127R157	5739456	-1.60777	1.53275	-2.22065		Protein phosphatase 1 regulatory subunit 16A	73062	Q923M0
C128R009	5732311	5.44276	3.44767	-103.466		Peroxidasin homolog	7837	Q92626
C128R012	5731139	-9.4334	-3.84726	50.6119		Plasmodium_HRP, Plasmodium histidine-rich protein (HRPII/III). This family consists of several histidine-rich protein II and III sequence from Plasmodium falciparum.
C128R041	5721995	-3.8666	3.34333	15.9838		UNKNOWN
C128R165	5735415	-10.1333	-3.51056	10.5613		UNKNOWN
C129R106	5735187	-1.62146	34.7947	4.7076		UNKNOWN
C129R141	5728019	-2.79696	21.055	10.5983		UNKNOWN
C129R169	5731027	12.9789	-1.90935	-1.70077		Aldehyde dehydrogenase X, mitochondrial	100174654	Q5R6B5
C130R027	5732536	-1.5417	2.59264	-2.23478	OSBP-related protein 11	Oxysterol-binding protein-related protein 11	114885	Q9BXB4
C130R063	5726477	-15.2035	-19.0733	9.28032		UNKNOWN
C130R073	5732338	-4.83336	84.9339	13.333		Plasmodium_HRP, Plasmodium histidine-rich protein (HRPII/III). This family consists of several histidine-rich protein II and III sequence from Plasmodium falciparum.
C130R100	5731098	-2.43494	2.77163	-21.2419		UNKNOWN
C132R040	5731358	-3.81426	45.4589	13.8361		UNKNOWN
C132R054	5722090	-20.5464	2.45628	54.2654		ATG13, Autophagy-related protein 13. Members of this family of phosphoproteins are involved in cytoplasm to vacuole transport (Cvt), and more specifically in Cvt vesicle formation. They are probably involved in the switching machinery regulating the conversion between the Cvt pathway and autophagy. Finally, ATG13 is also required for glycogen storage.
C132R073	5729855	-12.5199	124.696	38.5799		UNKNOWN
C133R041	5721972	-19.3159	2.22711	24.5808		Plasmodium_HRP, Plasmodium histidine-rich protein (HRPII/III). This family consists of several histidine-rich protein II and III sequence from Plasmodium falciparum.
C133R049	5722885	-2.68122	2.05779	-7.39662		WD repeat-containing protein 59	319481	Q8C0M0
C133R169	5730384	-63.7837	12.7518	38.0357		UNKNOWN
C134R092	5739660	-134.139	-14.7121	8.924		Chitin_bind_4, Insect cuticle protein. Many insect cuticular proteins include a 35-36 amino acid motif known as the R&R consensus. The extensive conservation of this region led to the suggestion that it functions to bind chitin. Provocatively, it has no sequence similarity to the well-known cysteine-containing chitin-binding domain found in chitinases and some peritrophic membrane proteins. Chiti…
C134R096	5739359	-32.563	3.42116	38.4529		UNKNOWN
C136R068	5723822	-29.157	5.59495	40.8822		UNKNOWN
C136R104	5732078	-17.2507	5.99249	49.8616		CLECT, CLECT: C-type lectin (CTL)/C-type lectin-like (CTLD) domain; protein domains homologous to the carbohydrate-recognition domains (CRDs) of the C-type lectins. This group is chiefly comprised of eukaryotic CTLDs, but contains some, as yet functionally uncharacterized, bacterial CTLDs. Many CTLDs are calcium-dependent carbohydrate binding modules; other CTLDs bind protein ligands, lipids, and…
C136R143	5727917	2.39257	-3.17128	2.18114		PRK08198, threonine dehydratase; Provisional.
C137R003	5726326	-3.61934	16.3919	25.561		Long-chain-fatty-acid--CoA ligase ACSBG2	328845	Q2XU92
C137R005	5738965	2.53114	-2.28767	2.67305		p450, Cytochrome P450. Cytochrome P450s are haem-thiolate proteins involved in the oxidative degradation of various compounds. They are particularly well known for their role in the degradation of environmental toxins and mutagens. They can be divided into 4 classes, according to the method by which electrons from NAD(P)H are delivered to the catalytic site. Sequence conservation is relatively lo…
C137R038	5729855	-8.85871	112.349	18.0108		UNKNOWN
C137R096	5728720	-2.33664	8.20899	4.07309		UNKNOWN
C137R111	5733795	1.55441	-4.14615	2.4482		Heparan sulfate 2-O-sulfotransferase pipe		Q86BJ3
C137R124	5728357	-5.57173	22.353	12.2968		UNKNOWN
C138R004	5727802	-8.86432	2.41485	29.3772		ATG13, Autophagy-related protein 13. Members of this family of phosphoproteins are involved in cytoplasm to vacuole transport (Cvt), and more specifically in Cvt vesicle formation. They are probably involved in the switching machinery regulating the conversion between the Cvt pathway and autophagy. Finally, ATG13 is also required for glycogen storage.
C138R071	5727662	-2.91337	4.56741	-3.09012		UDP-N-acetylglucosamine pyrophosphorylase	107652	Q91YN5
C139R017	5724559	-1.64916	1.87556	-2.52377	UXS-1	UDP-glucuronic acid decarboxylase 1	246232	Q5PQX0
C139R052	5721849	-27.1869	-2.42476	55.4584		UNKNOWN
C139R106	5733626	-13.6411	-2.62508	8.31365		UNKNOWN
C139R146	5735149	-9.53572	2.52968	-3.40342		UNKNOWN
C141R006	5725177	-2.01218	-6.44461	8.60651		UNKNOWN
C141R007	5726200	-9.05481	2.90571	15.1956		ChtBD2, Chitin-binding domain type 2.
C141R068	5729480	-3.48062	-5.84906	2.6695		GRP, Glycine rich protein family. This family of proteins includes several glycine rich proteins as well as two nodulins 16 and 24. The family also contains proteins that are induced in response to various stresses.
C142R021	5733573	-2.06944	-2.81816	2.53934		UNKNOWN
C142R141	5722343	-3.76352	-6.28181	2.68865		UNKNOWN
C142R168	5726999	-10.6881	-2.15233	50.0656		UNKNOWN
C143R041	5731475	-1.60887	2.40966	2.40976		UNKNOWN
C143R056	5732433	-11.9089	2.88282	9.41408		UNKNOWN
C143R104	5729931	-7.60104	62.0837	24.2824		PCEMA1, Acidic phosphoprotein precursor PCEMA1. This family consists of several acidic phosphoprotein precursor PCEMA1 sequences which appear to be found exclusively in Plasmodium chabaudi. PCEMA1 is an antigen that is associated with the membrane of the infected erythrocyte throughout the entire intraerythrocytic cycle. The exact function of this family is unclear.
C144R028	5724281	-2.00095	14.5371	8.19588		Proclotting enzyme heavy chain		P21902
C144R154	5737183	-14.3872	2.14339	17.2353		UNKNOWN
C145R003	5730176	3.94514	-2.60428	-2.32371		UNKNOWN
C145R034	5727540	-3.38468	3.6552	4.16713		UNKNOWN
C145R041	5723194	-3.57595	17.4181	26.3805		UNKNOWN
C145R079	5722496	-10.6046	2.09324	58.6712		UNKNOWN
C145R102	5723660	-13.3458	-2.08656	213.382		Cuticle protein 7		P82120
C145R168	5731090	-70.606	2.12691	60.536		Chitin_bind_4, Insect cuticle protein. Many insect cuticular proteins include a 35-36 amino acid motif known as the R&R consensus. The extensive conservation of this region led to the suggestion that it functions to bind chitin. Provocatively, it has no sequence similarity to the well-known cysteine-containing chitin-binding domain found in chitinases and some peritrophic membrane proteins. Chiti…
C146R039	5729525	2.08654	-1.94992	3.24655		Prolyl 4-hydroxylase subunit alpha-1	5033	P13674
C146R045	5727917	1.67067	-2.07898	1.77983		PRK08198, threonine dehydratase; Provisional.
C146R078	5723157	-9.38477	97.1204	47.7217		DOMON domain-containing protein CG14681	3772559	Q9VGY6
C146R116	5723157	-8.77925	101.6	33.8233		DOMON domain-containing protein CG14681	3772559	Q9VGY6
C146R167	5722441	-136.545	-2.62781	14.233		UNKNOWN
C147R009	5724229	1.66703	-1.54154	2.07663		UNKNOWN
C147R014	5723839	-1.55188	5.01494	9.85405		Organic cation transporter protein	42891	Q9VCA2
C147R044	5733143	-7.78094	2.4639	2.57227	PPIase	FK506-binding protein 2	2888506	Q6FSC1
C147R057	5728401	-133.982	3.55741	32.7817		UNKNOWN
C147R074	5732474	-2.6475	2.88343	1.6897		G1/S-specific cyclin-D3	540547	Q3MHH5
C147R101	5738574	1.99356	2.38707	-2.00874	AOE37-2	Peroxiredoxin-4	10549	Q13162
C147R168	5734473	-2.17331	17.5049	9.61334		UNKNOWN
C148R006	5739660	-84.0051	-13.2661	9.05768		Chitin_bind_4, Insect cuticle protein. Many insect cuticular proteins include a 35-36 amino acid motif known as the R&R consensus. The extensive conservation of this region led to the suggestion that it functions to bind chitin. Provocatively, it has no sequence similarity to the well-known cysteine-containing chitin-binding domain found in chitinases and some peritrophic membrane proteins. Chiti…
C148R059	5732699	2.08688	1.83128	-1.54972	17-beta-HSD 12	Estradiol 17-beta-dehydrogenase 12	549988	Q28IU1
C148R108	5726561	-2.2472	3.62108	6.95763		UNKNOWN
C148R119	5723428	-1.50909	6.78891	4.08754	GFAT 2	Glucosamine--fructose-6-phosphate aminotransferase [isomerizing] 2	14584	Q9Z2Z9
C148R143	5736432	-4.16932	1.68059	-24.0061		UNKNOWN
C149R007	5722257	-10.0896	2.32067	34.2486		Sugar transporter ERD6-like 6	843859	Q9FRL3
C149R057	5726368	-1.76005	5.49941	7.64942		Protein msta, isoform A	31200	O46040
C149R160	5732773	-1.95751	-2.47778	2.0506		UNKNOWN
C150R010	5735364	-12.9246	29.826	15.5587		UNKNOWN
C150R017	5728810	-2.26309	115.337	6.95627		UNKNOWN
C150R032	5723162	-13.851	217.089	30.5175		UNKNOWN
C150R067	5735323	-1.52467	-1.63665	8.01076		UNKNOWN
C151R040	5725234	-2.1468	-2.4839	2.2122		UNKNOWN
C151R062	5731618	-40.2107	-57.0891	13.0691		UNKNOWN
C151R101	5733457	-6.00599	-4.12931	13.0477	Poly(A)-binding protein 4	Polyadenylate-binding protein 4	8761	Q13310
C151R121	5722854	-19.462	3.6172	23.5241		UNKNOWN
C151R149	5735942	-7.33079	1.81673	11.839		UNKNOWN
C151R153	5736213	-4.58473	2.14087	7.77425		UNKNOWN
C152R012	5722997	-6.07758	24.7468	25.1643		UNKNOWN
C152R102	5736097	-11.7385	66.2803	19.6283		UNKNOWN
C152R166	5737374	-24.6841	-72.6653	9.4681		UNKNOWN
C153R088	5731951	-5.57925	1.7583	-46.4751		UNKNOWN
C153R101	5726891	2.14346	-9.43491	2.01616		UNKNOWN
C153R113	5725709	1.56249	2.24409	-2.12704		Ribosomal protein S6 kinase delta-1	26750	Q96S38
C153R114	5734375	-4.38928	2.17385	9.54806		UNKNOWN
C153R134	5731848	8.92488	-2.31539	-2.00832	RALDH 1	Retinal dehydrogenase 1	395264	P27463
C155R002	5730551	-35.9035	-2.85975	6.59881		UNKNOWN
C155R006	5730166	-2.24885	-1.80347	2.66409	PPIase	FK506-binding protein 2	2892052	Q6CUZ8
C155R019	5723141	-10.1204	37.8091	46.5338		UNKNOWN
C155R054	5728160	-18.2413	1.81546	7.43119		UNKNOWN
C155R076	5734344	-15.2146	-2.72346	32.8792		UNKNOWN
C155R153	5728281	2.73006	3.00209	-2.88123	GPx-2	Glutathione peroxidase 2		Q4AEI0
C156R033	5721866	-9.08516	2.16178	30.6613		ChtBD2, Chitin-binding domain type 2.
C156R053	5733573	-2.16304	-2.83221	2.34331		UNKNOWN
C156R063	5728989	-5.84877	48.4074	18.6428		UNKNOWN
C156R127	5733393	-20.4094	6.23321	12.3837		LDLa, Low Density Lipoprotein Receptor Class A domain, a cysteine-rich repeat that plays a central role in mammalian cholesterol metabolism; the receptor protein binds LDL and transports it into cells by endocytosis; 7 successive cysteine-rich repeats of about 40 amino acids are present in the N-terminal of this multidomain membrane protein; other homologous domains occur in related receptors, in…
C156R142	5729395	-59.251	13.8727	66.1152		UNKNOWN
C156R161	5725622	1.78082	1.66831	-1.65615		Transaldolase	21351	Q93092
C157R085	5727304	1.59595	1.63617	-2.02496	SRB1	Scavenger receptor class B member 1	20778	Q61009
C157R102	5735732	-2.41602	24.2466	6.75215		UNKNOWN
C157R151	5726878	-7.30659	217.247	21.9755		UNKNOWN
C158R006	5732233	31.2464	-7.51476	-5.25428		UNKNOWN
C158R008	5727824	-5.6118	40.7393	24.8301		UNKNOWN
C158R039	5730274	-28.9092	22.7373	28.2096		UNKNOWN
C158R040	5731179	-7.45203	-2.77725	7.19786		Cuticle protein 6		P82119
C158R146	5729830	-2.07881	-2.62169	3.09992		UNKNOWN
C158R164	5736646	-2.40009	1.95493	-7.94426	G-protein subunit alpha-12	Guanine nucleotide-binding protein subunit alpha-12	14673	P27600
C159R051	5730460	-7.17205	2.34443	4.19888	LIG-1	Leucine-rich repeats and immunoglobulin-like domains protein 1	26018	Q96JA1
C159R136	5722090	-16.6275	2.53761	69.7996		ATG13, Autophagy-related protein 13. Members of this family of phosphoproteins are involved in cytoplasm to vacuole transport (Cvt), and more specifically in Cvt vesicle formation. They are probably involved in the switching machinery regulating the conversion between the Cvt pathway and autophagy. Finally, ATG13 is also required for glycogen storage.
C159R167	5722311	-2.74752	1.51802	2.24666		UNKNOWN
C159R168	5724519	-2.40007	4.85429	2.32635		UNKNOWN
C160R122	5726870	-11.1388	3.23743	8.72901		UNKNOWN
C160R162	5735658	-2.90764	-6.03538	3.16661		UNKNOWN
C160R167	5725769	-40.0496	17.7942	79.6017		UNKNOWN
C161R077	5727829	3.74894	-2.41859	28.7117		UNKNOWN
C161R127	5731027	9.26608	-1.70262	-1.73867		Aldehyde dehydrogenase X, mitochondrial	100174654	Q5R6B5
C161R151	5728720	-1.75254	6.0191	2.98678		UNKNOWN
C162R072	5728477	-11.5179	2.19891	22.0318		UNKNOWN
C162R075	5725323	1.70365	-4.0219	4.0645		UNKNOWN
C162R097	5730632	6.61821	1.92764	-2.94664		UNKNOWN
C163R086	5733964	-4.41103	6.21305	8.21414		UNKNOWN
C163R106	5732486	-11.5468	43.1957	18.4396		UNKNOWN
C163R117	5723793	1.66768	-4.82959	2.38062		UNKNOWN
C163R134	5722901	-3.48529	1.84588	23.969		UNKNOWN
C164R013	5722797	-1.97987	1.76135	-4.54078		UNKNOWN
C164R045	5726322	-2.06656	2.00653	3.68092		Putative epidermal cell surface receptor	40861	Q04164
C164R062	5733149	-2.94278	1.79681	7.65001	Notch 4	Notch 4 intracellular domain	18132	P31695
C164R112	5729639	6.26855	6.96634	-2.46172		Mediator of DNA damage checkpoint protein 1	240087	Q5PSV9
C164R125	5732952	-1.50751	2.05832	4.46321		Protein msta, isoform A	31200	O46040
C164R129	5728369	-11.113	2.72574	-7.67515		UNKNOWN
C165R092	5731346	1.71342	1.68183	-2.65543		CBM21 domain-containing protein CG9619	40102	Q9VVY3
C165R094	5726275	1.52918	-2.22106	-1.54596	Malonate-semialdehyde dehydrogenase [acylating]	Probable methylmalonate-semialdehyde dehydrogenase [acylating], mitochondrial	1273463	Q7QC84
C165R160	5732174	-20.7508	-3.46314	114.544		UNKNOWN
C166R044	5722065	-10.0572	1.65698	21.8668		UNKNOWN
C166R047	5728261	-8.69458	-1.90933	24.2262		UNKNOWN
C166R073	5723294	2.8261	3.20097	-3.1895	GPx-2	Glutathione peroxidase 2		Q4AEI0
C166R096	5730515	-63.845	-2.08085	11.9448		UNKNOWN
C167R059	5737187	-8.27144	4.33764	13.2235		UNKNOWN
C167R137	5726435	-6.98903	5.18478	7.1102		UNKNOWN
C167R161	5730682	-2.09135	1.6018	-1.81303		Exonuclease GOR		Q8IX06
C168R114	5724955	2.26088	-9.98778	1.82067		UNKNOWN
C169R030	5740377	-2.9628	-2.78588	7.58559		Histone H1		P35060
C169R134	5728401	-82.3625	5.16409	35.7577		UNKNOWN
C169R137	5731323	-3.4933	-2.68495	3.10833		UNKNOWN
C169R146	5729883	-17.5057	2.34635	15.2247		ChtBD2, Chitin-binding domain type 2.
C170R075	5726137	-49.1348	32.1417	47.3482		UNKNOWN
C170R077	5731401	-1.59258	2.03326	-1.89979		RING finger protein 146	68031	Q9CZW6
C170R097	5731578	2.13467	-9.89501	2.12495		UNKNOWN
C170R163	5728899	-13.2666	3.00469	13.566		UNKNOWN
C171R081	5729147	-3.52393	26.265	14.2039		UNKNOWN
C171R096	5740334	2.7014	-2.0026	5.0919		UNKNOWN
C171R101	5725028	2.6353	-2.36809	-2.68809	MMP-2	72 kDa type IV collagenase	386583	Q90611
C171R120	5724795	-2.56574	21.5527	5.65864		Chitin_bind_4, Insect cuticle protein. Many insect cuticular proteins include a 35-36 amino acid motif known as the R&R consensus. The extensive conservation of this region led to the suggestion that it functions to bind chitin. Provocatively, it has no sequence similarity to the well-known cysteine-containing chitin-binding domain found in chitinases and some peritrophic membrane proteins. Chiti…
C171R161	5736907	-14.4898	-5.08029	16.9609		UNKNOWN
C172R012	5728357	-5.84927	15.2332	10.0404		UNKNOWN
C172R039	5732433	-15.5953	3.00581	8.14123		UNKNOWN
C172R101	5724743	-5.319	25.5133	29.0427		UNKNOWN
C172R163	5737176	-52.6402	-6.93333	26.5116		Glutenin_hmw, High molecular weight glutenin subunit. Members of this family include high molecular weight subunits of glutenin. This group of gluten proteins is thought to be largely responsible for the elastic properties of gluten, and hence, doughs. Indeed, glutenin high molecular weight subunits are classified as elastomeric proteins, because the glutenin network can withstand significant def…
C173R020	5732327	-8.27843	-1.97237	41.0608		BolA-like protein 3	388962	Q53S33
C173R155	5734998	-2.88234	30.8191	12.644	TESSP-1	Testis serine protease 1	71003	Q920S2
C173R162	5723610	-2.1187	2.79151	2.45096	MAJN	Myosin-XVIIIa		Q9JMH9
C174R016	5740377	-3.13618	-2.93649	7.76759		Histone H1		P35060
C174R156	5724955	2.18607	-9.53236	2.14743		UNKNOWN
C175R062	5732064	-3.78476	2.26324	14.0207		UNKNOWN
C175R086	5728768	-13.3746	11.0772	53.3169		UNKNOWN
C176R046	5723360	-3.24162	1.74002	12.1598		Enteropeptidase catalytic light chain	19146	P97435
C176R059	5738634	-43.7601	12.1742	11.4774		UNKNOWN
C176R149	5735817	-2.97341	21.1633	9.03838		UNKNOWN
C177R071	5729407	-1.62808	-1.731	11.1863		UNKNOWN
C177R161	5731360	-3.52123	-5.65618	2.70847		UNKNOWN
C178R010	5733821	-25.8591	4.35926	29.4017		UNKNOWN
C178R088	5727897	-1.83578	3.63969	4.60721		COUP transcription factor 1	13865	Q60632
C179R002	5739986	1.92411	-1.50131	4.45832		UNKNOWN
C180R015	5725252	-21.1348	45.0716	12.75		UNKNOWN
C180R092	5740820	-1.64106	-1.53887	6.53177		Collagen, Collagen triple helix repeat (20 copies). Members of this family belong to the collagen superfamily. Collagens are generally extracellular structural proteins involved in formation of connective tissue structure. The alignment contains 20 copies of the G-X-Y repeat that forms a triple helix. The first position of the repeat is glycine, the second and third positions can be any residue b…
C181R076	5732204	-37.9887	-11.2943	34.9852		Cuticle protein 6		P82119
C181R119	5728917	-1.62157	-1.70563	8.36019		UNKNOWN
C182R008	5722690	-5.01228	3.04236	7.54735	Furin-2	Furin-like protease 2	32604	P30432
C182R142	5723090	-5.48549	20.7335	10.4628		UNKNOWN
C182R153	5733415	-7.29648	3.28042	11.3572		UNKNOWN
C183R023	5735548	-117.966	2.45482	81.4972		Cuticle protein CP14.6		Q94984
C183R080	5728340	3.14396	-2.2107	4.02873		UNKNOWN
C183R084	5726477	-26.2078	-22.296	11.0387		UNKNOWN
C183R129	5722889	-11.0534	27.7358	28.2274		UNKNOWN
C184R095	5739424	-3.65797	40.6145	18.9087		Drf_FH1, Formin Homology Region 1. This region is found in some of the Diaphanous related formins (Drfs). It consists of low complexity repeats of around 12 residues.
C184R099	5732093	-3.54856	-2.2236	143.31		UNKNOWN
C184R146	5727882	-1.60103	-2.7314	3.20026		UNKNOWN
C185R152	5733143	-10.1052	3.01362	3.66058	PPIase	FK506-binding protein 2	2888506	Q6FSC1
C186R024	5732093	-3.43167	-2.25953	141.229		UNKNOWN
C186R030	5728359	-3.68125	2.60247	7.35092		Clavesin-1	100172224	Q5RCA6
C186R049	5739252	-1.84382	-1.76839	3.37881		UNKNOWN
C186R051	5729831	-16.457	128.678	14.0819		Putative uncharacterized protein DDB_G0280065	8622353	Q54VY3
C186R053	5729147	-6.09852	52.401	27.0211		UNKNOWN
C186R142	5729588	-1.85038	2.27209	-3.43103		Calcineurin subunit B type 1	44317	P48451
C187R012	5722552	-3.8203	4.21229	8.26652		UNKNOWN
C187R015	5725584	-2.13063	2.0321	3.29843		UNKNOWN
C187R100	5733978	-9.01598	276.485	29.9382		UNKNOWN
C187R110	5730632	7.06651	1.89397	-2.17052		UNKNOWN
C187R137	5723910	2.5361	-2.15775	3.65095		ANK, ankyrin repeats; ankyrin repeats mediate protein-protein interactions in very diverse families of proteins. The number of ANK repeats in a protein can range from 2 to over 20 (ankyrins, for example). ANK repeats may occur in combinations with other types of domains. The structural repeat unit contains two antiparallel helices and a beta-hairpin, repeats are stacked in a superhelical arrangem…
C188R072	5730528	1.74379	-1.62492	1.76102	CANP 3	Calpain-3	423233	Q92177
C188R108	5721969	2.62394	-2.16928	4.27855		ANK, ankyrin repeats; ankyrin repeats mediate protein-protein interactions in very diverse families of proteins. The number of ANK repeats in a protein can range from 2 to over 20 (ankyrins, for example). ANK repeats may occur in combinations with other types of domains. The structural repeat unit contains two antiparallel helices and a beta-hairpin, repeats are stacked in a superhelical arrangem…
C188R120	5727037	1.85621	-1.897	2.6927		Long-chain-fatty-acid--CoA ligase ACSBG2	379181	Q7ZYC4
C189R055	5723368	-3.73573	-1.89045	3.48364	DHPase	Dihydropyrimidinase	1807	Q14117
C189R096	5722790	2.25638	-1.53113	2.70172		UNKNOWN
C189R101	5732659	-4.05444	2.32298	3.86131	PDI	Protein disulfide-isomerase	39651	P54399
C189R121	5731149	2.62717	-3.0156	-5.23879	MMP-2	72 kDa type IV collagenase	17390	P33434
C189R124	5727584	1.53137	1.5215	-1.81514		UNKNOWN
C189R125	5737171	-1.75125	1.51278	-4.75991		TBC1 domain family member 20	504543	Q2T9Q1
C190R081	5731887	-4.24575	-1.82694	2.59059		UNKNOWN
C190R116	5725669	-3.35079	2.41366	7.7767		UNKNOWN
C191R024	5721814	-19.2428	4.67767	44.8682	Dpxt	Chorion peroxidase heavy chain	42131	Q9VEG6
C191R157	5734473	-2.7677	21.0929	10.1028		UNKNOWN
C191R161	5724932	-2.65174	-18.898	7.30631		UNKNOWN
C192R135	5738644	-21.7321	3.26301	5.45348		UNKNOWN
C192R164	5725136	-3.49682	-5.6227	2.81098		UNKNOWN
C193R012	5729541	-5.45759	1.86309	11.2655		UNKNOWN
C193R062	5722861	-2.97194	34.0759	5.26278		UNKNOWN
C193R066	5735536	-7.95515	2.82515	17.6339		Chitin_bind_4, Insect cuticle protein. Many insect cuticular proteins include a 35-36 amino acid motif known as the R&R consensus. The extensive conservation of this region led to the suggestion that it functions to bind chitin. Provocatively, it has no sequence similarity to the well-known cysteine-containing chitin-binding domain found in chitinases and some peritrophic membrane proteins. Chiti…
C193R165	5735111	-8.728	4.07159	35.3809	EKLF	Krueppel-like factor 1	10661	Q13351
C194R023	5722043	-9.30829	2.01916	17.7568		UNKNOWN
C194R045	5724957	-20.4254	94.3579	32.7019		UNKNOWN
C194R057	5737148	-2.69179	-6.42857	5.86433		UNKNOWN
C194R064	5737151	-3.06744	1.81467	8.85216	LRP	Low-density lipoprotein receptor-related protein 1	396170	P98157
C194R080	5739886	2.78854	3.54785	-5.88973	GLS	Putative glutaminase DH11.1	174282	Q19013
C194R127	5731299	-9.56298	2.75092	4.28498		UNKNOWN
C195R002	5737062	2.13743	-11.7783	3.54461		UNKNOWN
C195R042	5727479	-8.62797	-76.6959	11.0563		PRK07003, DNA polymerase III subunits gamma and tau; Validated.
C195R060	5732322	-6.80145	-4.25579	55.7279		Plasmodium_HRP, Plasmodium histidine-rich protein (HRPII/III). This family consists of several histidine-rich protein II and III sequence from Plasmodium falciparum.
C195R092	5727960	-30.3903	9.78612	27.0793		UNKNOWN
C195R144	5723771	-5.22773	2.88453	16.4535		UNKNOWN
C196R030	5724590	-3.39795	1.92196	5.12847		Transmembrane protein 64	100201	Q3U145
C196R064	5735770	-48.51	2.13045	118.989		ATG13, Autophagy-related protein 13. Members of this family of phosphoproteins are involved in cytoplasm to vacuole transport (Cvt), and more specifically in Cvt vesicle formation. They are probably involved in the switching machinery regulating the conversion between the Cvt pathway and autophagy. Finally, ATG13 is also required for glycogen storage.
C197R070	5729435	1.77114	-1.68425	1.64677		YLP motif-containing protein 1	299199	P0CB49
C198R008	5736253	-41.3546	3.97558	48.7757		UNKNOWN
C198R015	5724060	-2.25976	13.0524	7.25004		Pro-resilin	36880	Q9V7U0
C198R069	5722499	4.95036	-2.06734	3.57688	MMP-9	82 kDa matrix metalloproteinase-9	4318	P14780
C198R135	5725136	-3.21298	-5.43675	2.62467		UNKNOWN
C199R025	5723194	-3.30655	13.8723	22.9091		UNKNOWN
C199R033	5730524	-54.7885	-1.94852	13.5171		ATG13, Autophagy-related protein 13. Members of this family of phosphoproteins are involved in cytoplasm to vacuole transport (Cvt), and more specifically in Cvt vesicle formation. They are probably involved in the switching machinery regulating the conversion between the Cvt pathway and autophagy. Finally, ATG13 is also required for glycogen storage.
C199R088	5734153	1.8946	2.13929	-1.86298		UNKNOWN
C199R120	5734375	-4.05899	2.07827	8.9543		UNKNOWN
C199R129	5734011	-38.494	13.2711	8.62167		UNKNOWN
C199R159	5727656	-11.1645	1.7221	21.9053		UNKNOWN
C200R149	5737183	-14.5039	2.14181	17.3489		UNKNOWN
C201R059	5722867	-6.66826	67.1274	10.5696		Lectin_C, Lectin C-type domain. This family includes both long and short form C-type.
C201R078	5731301	-16.9947	3.58487	28.4946		UNKNOWN
C201R103	5739211	-5.30685	1.79755	-43.2366		UNKNOWN
C202R085	5731388	2.81163	-5.79099	-17.8698	MMP-2	72 kDa type IV collagenase	4313	P08253
C202R088	5727004	-3.4976	40.4936	16.1805	TESSP-1	Testis serine protease 1	71003	Q920S2
C202R108	5726314	-4.33941	2.52968	3.53868		UNKNOWN
C202R141	5734136	-2.01903	1.69052	-1.6289		UNKNOWN
C203R078	5735683	-6.53617	175.14	21.6337		UNKNOWN
C203R085	5735435	-3.08333	2.94931	8.15541		UNKNOWN
C203R091	5722098	-1.96847	-2.34825	2.17846		UNKNOWN
C203R096	5724912	-2.45189	-1.68863	4.13128		UNKNOWN
C203R099	5724519	-2.50909	4.54187	2.20196		UNKNOWN
C203R108	5730573	-5.18337	-2.49656	17.2574		Cuticle protein 6		P82119
C203R142	5722690	-3.78118	2.87178	5.37024	Furin-2	Furin-like protease 2	32604	P30432
C203R143	5725593	-3.17915	1.51572	8.99349		Probable glutathione peroxidase 8-B	495339	Q5U583
C204R104	5737176	-53.0233	-7.66188	47.6912		Glutenin_hmw, High molecular weight glutenin subunit. Members of this family include high molecular weight subunits of glutenin. This group of gluten proteins is thought to be largely responsible for the elastic properties of gluten, and hence, doughs. Indeed, glutenin high molecular weight subunits are classified as elastomeric proteins, because the glutenin network can withstand significant def…
C204R116	5727001	-1.74688	2.4916	12.3508		DOMON domain-containing protein CG14681	3772559	Q9VGY6
C204R168	5729076	-43.3947	12.0898	10.2939		UNKNOWN
C206R024	5730554	-19.3269	-5.11058	23.909		UNKNOWN
C206R092	5734281	-3.43799	2.94285	8.23352		UNKNOWN
C207R002	5729196	1.95883	2.36855	-1.90973	AOE37-2	Peroxiredoxin-4	10549	Q13162
C207R025	5723393	-43.3348	-6.60684	5.50905		UNKNOWN
C208R112	5727003	-4.64073	40.92	14.8871		Plasma kallikrein light chain		P26262
C209R170	5731139	-8.67494	-4.24982	48.9172		Plasmodium_HRP, Plasmodium histidine-rich protein (HRPII/III). This family consists of several histidine-rich protein II and III sequence from Plasmodium falciparum.
C210R006	5724061	-2.67606	13.6591	8.11212		Pro-resilin	36880	Q9V7U0
C210R027	5733161	6.64178	-3.33239	-64.445		UNKNOWN
C210R039	5731020	-1.60044	2.03708	-2.02099	Katanin p60 subunit A-like 1	Katanin p60 ATPase-containing subunit A-like 1	492790	Q5U3S1
C210R048	5738389	-2.24851	4.35252	-29.0315	eIF4E-1A	Eukaryotic translation initiation factor 4E-1A	79380	Q9DFS6
C211R055	5732773	-1.99155	-2.64252	2.27536		UNKNOWN
C211R167	5728988	-7.07108	151.33	22.3741		Pro-resilin	36880	Q9V7U0
C212R001	5732174	-13.5479	-2.75295	92.6022		UNKNOWN
C212R058	5733161	6.37073	-3.41686	-43.1118		UNKNOWN
C212R094	5732023	1.99795	1.93214	-2.40442		UNKNOWN
C212R155	5723822	-30.7007	6.16859	43.6335		UNKNOWN
C212R167	5730554	-13.8493	-4.7208	18.8023		UNKNOWN
C213R010	5731019	2.0075	-3.03506	2.47453		Cytochrome P450 3A14		Q64417
C213R028	5732820	-20.3982	-17.7907	10.2882		UNKNOWN
C213R077	5729102	-21.7948	3.13424	33.5649		COG5651, PPE-repeat proteins [Cell motility and secretion].
C213R089	5724446	-16.3989	-2.81891	87.8861		UNKNOWN
C213R163	5723059	-1.77018	1.63541	-3.53403		UNKNOWN
C214R068	5725434	-6.14583	187.643	17.4348		UNKNOWN
C215R092	5729755	-152.276	2.42469	65.4896		UNKNOWN
C216R122	5731045	-18.3302	5.10363	12.3641		LDLa, Low Density Lipoprotein Receptor Class A domain, a cysteine-rich repeat that plays a central role in mammalian cholesterol metabolism; the receptor protein binds LDL and transports it into cells by endocytosis; 7 successive cysteine-rich repeats of about 40 amino acids are present in the N-terminal of this multidomain membrane protein; other homologous domains occur in related receptors, in…
C217R094	5735052	2.09017	1.85414	-2.60102		UNKNOWN
C217R143	5734820	6.86948	-2.66556	-2.045		Aldehyde dehydrogenase		Q27640
C218R051	5724801	-1.9075	2.60093	5.77322		UNKNOWN
C218R162	5739211	-5.45516	1.56443	-41.7694		UNKNOWN
C219R006	5730145	2.01786	2.70755	-1.78499	ASM-like phosphodiesterase 3b	Acid sphingomyelinase-like phosphodiesterase 3b	27293	Q92485
C219R068	5740010	-2.0025	8.45792	13.2643		UNKNOWN
C219R144	5734505	-1.93203	63.2361	4.72153		UNKNOWN
C220R060	5727270	-4.91827	-104.796	11.9188		UNKNOWN
C221R006	5740010	-2.02895	9.17499	14.5535		UNKNOWN
C222R038	5722524	-3.20698	47.5502	19.6957		UNKNOWN
C223R043	5722257	-10.3143	2.4914	33.3143		Sugar transporter ERD6-like 6	843859	Q9FRL3
C223R064	5731020	-1.5691	2.16809	-2.16495	Katanin p60 subunit A-like 1	Katanin p60 ATPase-containing subunit A-like 1	492790	Q5U3S1
C223R069	5724559	-1.64811	1.83652	-2.61079	UXS-1	UDP-glucuronic acid decarboxylase 1	246232	Q5PQX0
C223R080	5727616	-1.94687	2.32691	-1.90883		UNKNOWN
C223R098	5738455	-89.5573	2.90778	82.438		Chitin_bind_4, Insect cuticle protein. Many insect cuticular proteins include a 35-36 amino acid motif known as the R&R consensus. The extensive conservation of this region led to the suggestion that it functions to bind chitin. Provocatively, it has no sequence similarity to the well-known cysteine-containing chitin-binding domain found in chitinases and some peritrophic membrane proteins. Chiti…
C223R102	5731045	-17.5447	5.15978	12.4578		LDLa, Low Density Lipoprotein Receptor Class A domain, a cysteine-rich repeat that plays a central role in mammalian cholesterol metabolism; the receptor protein binds LDL and transports it into cells by endocytosis; 7 successive cysteine-rich repeats of about 40 amino acids are present in the N-terminal of this multidomain membrane protein; other homologous domains occur in related receptors, in…
C223R108	5734184	-5.3442	2.72625	17.6199		UNKNOWN
C223R163	5732056	-8.14148	4.05316	-16.7231		Putative fatty acyl-CoA reductase CG5065	36860	A1ZAI5
C224R034	5725531	1.71556	-1.87266	2.87186		UNKNOWN
C224R050	5726778	-3.6032	19.6054	11.8413		UNKNOWN
C224R064	5721827	-13.5239	2.4768	25.0794	AMCase	Acidic mammalian chitinase	282645	Q95M17
C225R062	5739819	-9.18793	-13.4251	18.6261		UNKNOWN
C226R101	5723766	-28.9294	2.75105	20.2405		UNKNOWN
C226R140	5733127	1.58872	1.56367	-1.71341	HAD	3-hydroxyanthranilate 3,4-dioxygenase	56823	P46953
C227R028	5726682	-9.73024	-1.78776	7.7972		UNKNOWN
C227R043	5722157	-30.6716	22.6357	89.0411		UNKNOWN
C227R057	5726744	-41.6679	-48.4809	9.27446		UNKNOWN
C227R059	5735639	-5.31699	1.9983	11.9513		UNKNOWN
C227R088	5727899	-3.69946	-8.58731	47.8935		UNKNOWN
C229R037	5728296	-1.74005	27.0536	6.391		UNKNOWN
C229R122	5728761	5.97268	10.2423	-4.02419		UNKNOWN
C230R012	5738390	-1.79877	8.578	2.2178	CaM-KI	Calcium/calmodulin-dependent protein kinase type 1	8536	Q14012
C230R019	5724318	-3.61475	16.5095	25.7487	hsBGM	Long-chain-fatty-acid--CoA ligase ACSBG1	23205	Q96GR2
C230R047	5730452	-8.58875	20.4269	29.3844		UNKNOWN
C230R048	5726561	-2.30569	3.81802	7.13533		UNKNOWN
C230R127	5736213	-4.36995	1.876	7.36124		UNKNOWN
C230R133	5729588	-1.88342	2.86771	-4.03016		Calcineurin subunit B type 1	44317	P48451
C231R059	5722271	-43.8944	27.5717	46.509		UNKNOWN
C231R072	5727277	-2.28435	40.8708	10.4678		UNKNOWN
C231R113	5724318	-3.11366	13.9785	21.1211	hsBGM	Long-chain-fatty-acid--CoA ligase ACSBG1	23205	Q96GR2
C232R087	5730482	-1.52707	-2.49517	2.98582		UNKNOWN
C232R109	5734281	-3.2027	2.80087	7.30043		UNKNOWN
C232R151	5730861	3.30644	-3.03939	-3.42057	MMP-9	Matrix metalloproteinase-9	81687	P50282
C233R132	5731618	-23.5025	-62.9119	9.7702		UNKNOWN
C234R163	5726870	-12.9661	3.58109	7.54239		UNKNOWN
C234R164	5731306	-2.44447	3.16729	5.45063	KSST	Carbohydrate sulfotransferase 1	445124	Q6DBY9
C235R062	5722889	-6.72464	17.5903	19.7719		UNKNOWN
C235R114	5724912	-2.63932	-2.27772	4.81279		UNKNOWN
C236R129	5733821	-8.79473	3.72337	19.9151		UNKNOWN
C236R141	5737945	2.15331	-2.12704	2.92225		UNKNOWN
C236R142	5724422	-4.71788	17.1519	13.039		Glutenin_hmw, High molecular weight glutenin subunit. Members of this family include high molecular weight subunits of glutenin. This group of gluten proteins is thought to be largely responsible for the elastic properties of gluten, and hence, doughs. Indeed, glutenin high molecular weight subunits are classified as elastomeric proteins, because the glutenin network can withstand significant def…
C237R035	5731149	2.69433	-3.51517	-5.36392	MMP-2	72 kDa type IV collagenase	17390	P33434
C237R073	5736681	-1.51598	2.02724	-1.87343		Nuclear distribution protein nudE-like 1-A	394244	Q7SXI6
C237R102	5731938	1.66369	-1.56722	2.26035		UNKNOWN
C237R122	5722914	2.16116	2.09917	-2.62143		UNKNOWN
C238R044	5722441	-215.904	-2.70261	9.8024		UNKNOWN
C238R124	5727270	-4.47269	-96.5266	12.666		UNKNOWN
C238R149	5723360	-3.31729	1.83749	11.4178		Enteropeptidase catalytic light chain	19146	P97435
C239R014	5729336	-26.5535	11.4491	63.0775		UNKNOWN
C239R015	5733462	-2.26167	-2.0133	1.65425	BCKD-kinase	[3-methyl-2-oxobutanoate dehydrogenase [lipoamide]] kinase, mitochondrial	12041	O55028
C239R062	5732275	-3.18404	-1.96998	3.89232	DHPase	Dihydropyrimidinase	1807	Q14117
C239R145	5723506	-2.19374	-2.57522	2.36359		UNKNOWN
C240R070	5732056	-6.56371	2.93626	-15.8698		Putative fatty acyl-CoA reductase CG5065	36860	A1ZAI5
C240R091	5726994	-2.56217	-6.05935	8.58276		UNKNOWN
C240R102	5732551	4.37493	-1.64172	2.6691		Protein IWS1 homolog	73473	Q8C1D8
C241R009	5722361	-2.26498	19.621	3.42247		UNKNOWN
C241R031	5729860	-3.61369	42.4918	12.1446		UNKNOWN
C241R044	5728605	-7.58426	43.2027	36.4989		Plasmodium_HRP, Plasmodium histidine-rich protein (HRPII/III). This family consists of several histidine-rich protein II and III sequence from Plasmodium falciparum.
C241R066	5729336	-24.5044	8.92123	59.9629		UNKNOWN
C241R111	5731870	6.71152	-20.3618	2.36845		Uncharacterized protein C10orf58 homolog	361118	Q6AXX6
C241R119	5731537	2.07612	2.25437	-4.73737		Elongation of very long chain fatty acids protein AAEL008004	5569887	Q1HRV8
C242R018	5733263	-1.53188	2.96444	-8.58217	NADP-ME	NADP-dependent malic enzyme		P28227
C242R062	5722609	1.99291	-4.52615	8.01795		UNKNOWN
C242R087	5721814	-15.3994	4.60969	25.2019	Dpxt	Chorion peroxidase heavy chain	42131	Q9VEG6
C242R116	5732424	2.67009	2.05198	-2.13254		PI-PLC X domain-containing protein 3	239318	Q8BLJ3
C242R130	5723141	-6.85293	42.9355	36.4827		UNKNOWN
C242R144	5722486	-17.1427	3.41569	22.5157		UNKNOWN
C242R147	5726514	-2.24741	4.9381	3.71108		UNKNOWN
C242R170	5737945	2.23319	-2.35743	3.11438		UNKNOWN
C243R023	5724590	-3.0231	1.95307	4.81586		Transmembrane protein 64	100201	Q3U145
C243R032	5725434	-21.7625	69.7745	24.5763		UNKNOWN
C243R065	5727378	-12.2165	45.1745	18.6934		UNKNOWN
C243R074	5736432	-3.53193	1.55144	-18.4181		UNKNOWN
C243R122	5729196	1.9173	2.15688	-2.19594	AOE37-2	Peroxiredoxin-4	10549	Q13162
C243R146	5725862	-16.7354	-3.51537	35.99		UNKNOWN
C244R015	5734169	-1.78655	1.60552	3.74376		Tubulin alpha-1 chain		Q8T6A5
C244R019	5721849	-39.7269	-3.27567	62.1131		UNKNOWN
C244R069	5722548	-3.35375	13.8843	11.4371		UNKNOWN
C244R074	5728187	-4.36271	1.71461	6.81261		UNKNOWN
C244R122	5731035	-2.38364	-2.57672	18.2665		UNKNOWN
C244R131	5725034	-1.53283	-1.69983	7.79509		Collagen alpha-2(IV) chain		P27393
C245R022	5728843	-1.71437	2.78982	6.30037	Guanosine monophosphate reductase	Probable GMP reductase	178834	O16294
C245R035	5734750	-2.84077	2.0742	7.09226	AtPIP5K8	Phosphatidylinositol-4-phosphate 5-kinase 8	842381	Q8RY89
C245R138	5724060	-2.49806	21.3877	9.22613		Pro-resilin	36880	Q9V7U0
C245R149	5732322	-7.01835	-4.65188	55.4106		Plasmodium_HRP, Plasmodium histidine-rich protein (HRPII/III). This family consists of several histidine-rich protein II and III sequence from Plasmodium falciparum.
C245R165	5722154	-3.54373	1.80584	5.91994		UNKNOWN
C246R099	5723938	1.64465	-1.91478	2.70137		UNKNOWN
C246R103	5739349	-3.12433	13.2218	13.287		UNKNOWN
C247R042	5727715	-2.1285	16.96	4.28071		Chitin_bind_4, Insect cuticle protein. Many insect cuticular proteins include a 35-36 amino acid motif known as the R&R consensus. The extensive conservation of this region led to the suggestion that it functions to bind chitin. Provocatively, it has no sequence similarity to the well-known cysteine-containing chitin-binding domain found in chitinases and some peritrophic membrane proteins. Chiti…
C247R052	5721820	-1.71082	2.31828	-1.97693	Na(+)/K(+) ATPase alpha subunit	Sodium/potassium-transporting ATPase subunit alpha		P13607
C247R151	5729589	-2.17431	113.231	5.98949		UNKNOWN
C248R101	5728049	2.72599	-3.16339	3.93871		UNKNOWN
C248R102	5732096	-2.61193	23.1987	5.09297		Chitin_bind_4, Insect cuticle protein. Many insect cuticular proteins include a 35-36 amino acid motif known as the R&R consensus. The extensive conservation of this region led to the suggestion that it functions to bind chitin. Provocatively, it has no sequence similarity to the well-known cysteine-containing chitin-binding domain found in chitinases and some peritrophic membrane proteins. Chiti…
C248R109	5731452	-7.70372	3.63455	19.0456		UNKNOWN
C248R115	5727037	1.82035	-1.91166	2.57399		Long-chain-fatty-acid--CoA ligase ACSBG2	379181	Q7ZYC4
C249R016	5735415	-41.3217	-3.32223	32.7467		UNKNOWN
C249R049	5731392	-32.4696	2.28143	34.0709		Cuticle protein CP14.6		Q94984
C249R123	5722298	-2.91701	39.994	15.029		UNKNOWN
C249R127	5727656	-11.227	1.6951	21.322		UNKNOWN
C249R136	5728012	-21.0431	-67.2792	10.2644		UNKNOWN
C250R049	5733164	-8.19584	23.5498	21.8302		UNKNOWN
C250R051	5726314	-3.94688	2.41374	3.30978		UNKNOWN
C250R058	5730166	-1.76953	-1.79692	2.65295	PPIase	FK506-binding protein 2	2892052	Q6CUZ8
C250R158	5733273	-33.311	9.07866	41.8236		Aldose 1-epimerase	616676	Q5EA79
C251R090	5738011	-5.30471	1.54634	19.3136		UNKNOWN
C251R153	5732399	-3.47477	-2.20662	154.862		UNKNOWN
C252R011	5722194	1.75811	1.95412	-1.5897		UNKNOWN
C252R012	5731584	-1.66067	34.4256	4.6623		UNKNOWN
C252R092	5723365	-5.69093	-3.73506	16.9035		UNKNOWN
C252R143	5736643	-1.62271	1.76415	-21.5809	GLUT-8	Solute carrier family 2, facilitated glucose transporter member 8	282867	P58354
C252R165	5726516	-35.8951	2.1659	105.642		UNKNOWN
C253R121	5729512	-7.3412	8.59426	23.8198		UNKNOWN
C254R141	5729512	-7.5712	7.3604	15.6496		UNKNOWN
C254R160	5733342	2.80451	-3.73466	-4.68502	MMP-9	Matrix metalloproteinase-9	81687	P50282
C254R165	5737293	-5.29773	-2.08015	8.53036		UNKNOWN
C255R058	5737056	-3.38292	-2.26718	130.529		UNKNOWN
C255R063	5728242	-7.7002	25.286	15.3787		UNKNOWN
C255R153	5726501	-2.07787	4.76759	4.82273		UNKNOWN
C256R019	5729800	-9.96851	2.77829	-10.2756		UNKNOWN
C256R043	5721866	-4.82911	2.20572	14.0236		ChtBD2, Chitin-binding domain type 2.
C256R049	5723609	-8.97411	-4.69326	11.6466	MAJN	Myosin-XVIIIa		Q9JMH9
C256R140	5733238	-47.4451	-12.0973	5.73259		Cuticle protein 21		P81225
C257R036	5726864	7.7659	-1.99093	6.67448		UNKNOWN
C257R105	5740334	2.34278	-1.74213	3.98543		UNKNOWN
C257R107	5733228	-23.5395	17.8011	54.4308		UNKNOWN
C257R132	5731346	1.71809	1.51736	-2.23337		CBM21 domain-containing protein CG9619	40102	Q9VVY3
C257R143	5721959	1.96297	-1.58534	-1.78849		Glutathione S-transferase 1, isoform D	1273988	Q93113
C257R160	5722917	-4.15321	3.57669	10.8079	Tspan-1	Tetraspanin-1		Q4R7W6
C258R041	5722051	-4.02121	138.869	11.7834		UNKNOWN
C258R101	5727085	-3.03228	-2.06306	14.1042		UNKNOWN
C259R017	5724159	-40.8706	-2.18562	14.5781		UNKNOWN
C259R071	5722917	-4.70149	3.78067	14.7375	Tspan-1	Tetraspanin-1		Q4R7W6
C260R093	5725234	-2.15208	-2.79581	2.23433		UNKNOWN
C260R095	5722361	-2.30564	14.2242	2.60985		UNKNOWN
C261R113	5735500	-2.30105	16.3225	14.5983		UNKNOWN
C261R115	5727088	-1.63293	-1.88739	2.35639		UNKNOWN
C262R059	5735683	-13.3641	416.093	32.7521		UNKNOWN
C262R103	5725044	3.37663	-4.63792	5.29527		Prolyl 4-hydroxylase subunit alpha-2	178170	Q20065
C262R119	5725874	-2.15325	1.81107	8.96255		UNKNOWN
C262R135	5729976	-24.6432	19.6603	55.6014		UNKNOWN
C263R018	5722067	-8.41587	19.8717	25.7545		UNKNOWN
C263R024	5728909	-3.03467	-2.09666	3.35927	E(spl)mgamma	Enhancer of split mgamma protein	43151	Q01070
C263R047	5728138	-5.10273	60.885	24.0735		UNKNOWN
C263R085	5722148	-24.1762	2.82886	16.3891		ChtBD2, Chitin-binding domain type 2.
C264R055	5725252	-19.5284	35.2523	10.5385		UNKNOWN
C264R076	5732424	2.66929	2.08876	-1.86814		PI-PLC X domain-containing protein 3	239318	Q8BLJ3
C264R128	5723109	-19.0647	5.1557	22.2354		UNKNOWN
C264R141	5724743	-3.24645	19.0429	21.2169		UNKNOWN
C264R142	5736656	1.71718	-1.89308	-7.66761		UNKNOWN
C265R033	5739360	-3.1771	37.6465	8.88979		PRK12323, DNA polymerase III subunits gamma and tau; Provisional.
C265R044	5738488	7.72467	2.45018	-144.024	Dpxt	Chorion peroxidase heavy chain	42131	Q9VEG6
C072R011*	5729738	1.83349	1.79207	1.74463		UNKNOWN
C024R003*	5725523	-2.14851	-1.70868	-1.73304		RRP15-like protein	51018	Q9Y3B9

## Sheet: Duplicate probe averages
This sheet contains all transcripts (contigs) with duplicate probes showing concordant sex-biased expression. An average (AVG) and standard deviation (SD) for duplicate probes is presented below. For information on each individual probe, see "male-biased consensus" or "female-biased consensus" sheets at the start of this additional file.
Male-biased								Female-biased
Contig ID	BMA2a - Avg	BMA2a - SD	BMA2b - Avg	BMA2b - SD	Pacific - Avg	Pacific - SD		Contig ID	BMA2a - Avg	BMA2a - SD	BMA2b - Avg	BMA2b - SD	Pacific - Avg	Pacific - SD
5721965	101.186	20.5175	19.7903	0.0355074	9.12315	3.28583		5721775	3.12764	0.0688854	1.91695	0.208679	3.07703	0.209003
5721986	112.708	46.9557	55.1243	38.0524	12.9373	1.23432		5721974	2.14275	0.0151995	1.90262	0.0878208	2.71873	0.429383
5722104	3.83214	1.68048	2.04133	0.146177	2.78178	1.03395		5722130	1.90888	0.0638186	1.58543	0.0668599	2.13423	0.152022
5722107	314.67	175.008	58.6522	21.0979	11.569	1.41322		5722173	3.56186	0.377612	1.55253	0.0405955	6.41921	0.0581661
5722113	73.0853	1.88307	18.9902	0.625614	6.19424	1.77562		5722286	1.64944	0.0163702	1.66279	0.0146199	1.52749	0.00549726
5722185	4.08118	0.253069	1.84195	0.00852226	5.55508	0.0780104		5722349	2.24613	0.104584	1.51036	0.0125483	3.23212	0.149785
5722252	889.239	271.759	185.767	59.9304	36.7705	7.65376		5722454	1.88887	0.00319047	1.65294	0.144792	2.61495	0.472567
5722371	87.3947	14.9469	56.4504	31.607	5.80148	0.410619		5722518	1.63472	0.0721106	2.14901	0.0879213	1.84284	0.0751138
5722375	3.21763	0.017656	2.92722	0.0397155	1.83854	0.113272		5722577	2.20522	0.160461	1.67694	0.0910401	2.82978	0.3729
5722493	2.1282	0.0630625	3.14146	0.440414	6.61988	1.32036		5722785	1.72467	0.0264227	1.91786	0.125548	1.89446	0.0198213
5722494	2.20283	0.0144478	3.29161	0.309384	6.8205	0.937749		5722830	8.9099	1.08494	2.40279	0.0144149	10.967	2.26269
5722743	542.89	282.088	261.163	166.595	21.5593	5.70919		5722897	2.37547	0.0532889	2.24377	0.144583	2.20659	0.344785
5722846	2.44132	0.240526	1.93114	0.0475331	3.37642	0.0921298		5722952	2.32023	0.00380112	2.16593	0.057477	1.83114	0.0589262
5722939	1.72706	0.210161	2.57388	0.119165	1.58625	0.00223821		5723115	1.54715	0.00626468	2.1646	0.0508036	1.95764	0.116885
5722948	222.224	72.2783	78.0386	21.6355	21.4007	3.93416		5723273	2.42927	0.0236707	1.60452	0.018115	3.77577	0.417447
5723074	2.5206	0.040421	2.74719	0.139782	4.27459	0.175364		5723476	1.67106	0.0849761	2.48792	0.113516	1.78832	0.20952
5723089	1.76132	0.0932453	2.53093	0.166066	1.68393	0.0330066		5723488	1.58743	0.034223	1.75543	0.111844	2.1399	0.0427823
5723100	1.61554	0.0287629	2.32074	0.108214	1.83878	0.0410957		5723776	2.98852	0.0297889	2.16018	0.000815931	2.93473	0.750802
5723197	2.6457	0.0801094	1.57145	0.0491055	3.90843	0.0287438		5723836	2.1282	0.238637	1.83375	0.0809902	1.59143	0.0406551
5723210	73.4791	27.2079	33.0793	8.54339	17.7222	0.422288		5723911	1.81869	0.0409329	1.69695	0.177247	2.16107	0.156137
5723229	2.06603	0.227323	1.73368	0.0294663	4.16907	0.477619		5723915	2.9264	0.204527	2.2233	0.0101987	2.93927	0.121969
5723251	2.55085	0.0601085	1.70586	0.195598	2.61863	0.128168		5723950	1.97307	0.0475858	2.07453	0.129975	1.6239	0.0732614
5723366	3.12086	0.0363097	1.64854	0.104502	3.49632	0.318509		5723999	1.8222	0.0284225	2.47777	0.0178001	2.93444	0.152657
5723432	75.3676	44.2081	27.6512	17.5026	13.3964	1.20538		5724033	2.17975	0.0836216	1.77875	0.069505	2.51074	0.00677316
5723436	6.58719	0.580206	2.20767	0.173549	5.80122	0.0565801		5724251	1.67217	0.104235	1.81979	0.0963925	7.26284	0.875195
5723516	77.7656	35.0599	22.617	8.40236	9.67164	2.71815		5724290	1.90755	0.0695642	1.72327	0.0348585	1.70107	0.0790838
5723650	220.632	131.245	70.8235	28.1043	37.6299	35.8686		5724331	2.50158	0.174187	1.89596	0.0229214	2.12599	0.509613
5723694	89.0797	61.2833	36.7378	18.7213	8.73641	4.38159		5724450	5.77247	5.3754	5.7445	5.5492	1.72585	0.271113
5723714	160.901	106.55	60.2792	40.4044	15.7703	2.14342		5724469	3.00799	0.0848225	2.21293	0.0240545	2.1211	0.0080637
5723792	4.18818	0.186975	2.15789	0.148961	10.3303	0.085893		5724541	1.87012	0.0229267	1.88359	0.0425829	1.74466	0.0207708
5723853	2.77673	0.0418198	1.55482	0.0695421	1.92553	0.0566866		5724551	2.25562	0.213034	1.66073	0.144742	1.82162	0.0878867
5723956	60.0544	17.932	16.2988	3.36064	13.9028	0.258929		5724656	2.24821	0.0790806	2.08503	0.149348	1.99576	0.279893
5723961	65.8248	25.1044	22.8867	10.049	9.36305	0.497773		5724884	3.07861	0.356545	2.28244	0.138227	3.59574	0.667397
5723970	104.12	63.6051	39.993	27.5887	15.6377	0.996847		5724899	2.62498	0.0653333	1.5883	0.0302217	2.77258	0.0220883
5723990	1.57587	0.0886223	2.8563	0.173012	4.25178	0.111764		5725111	1.92424	0.180904	1.92811	0.125627	2.03136	0.141898
5724071	1.59466	0.0560821	2.47646	0.149874	2.92052	0.218459		5725240	2.7158	0.246819	2.2664	0.437173	2.29685	0.034243
5724099	1.81469	0.0321845	1.71363	0.136239	1.82756	0.0344234		5725387	1.94292	0.0231242	2.06175	0.0233584	3.30802	0.069546
5724148	1.67318	0.0915075	1.62752	0.0598652	8.51311	1.57277		5725451	1.80345	0.0805769	2.15015	0.0960963	2.04715	0.0560285
5724158	103.306	27.9952	53.7193	27.9927	10.016	1.07124		5725471	1.97568	0.0420119	2.20742	0.10335	2.08219	0.0103912
5724215	3.19961	0.00252154	2.68327	0.122516	4.55665	0.164854		5725525	2.47728	0.405807	2.22256	0.196453	2.35279	0.248371
5724223	2.86805	0.15639	2.00746	0.133492	5.67203	0.0820218		5725577	2.20353	0.0688435	1.82873	0.0322839	1.70718	0.0245865
5724259	75.6985	31.5693	30.4889	18.1386	10.0105	2.03587		5725695	2.12898	0.0805457	1.79778	0.0162605	1.83869	0.445766
5724336	2.84382	0.00967188	2.04288	0.0944444	5.61276	0.110775		5725788	2.74104	0.627435	2.46988	0.268699	2.92071	0.334262
5724396	5.71603	1.04549	1.94456	0.0990575	3.57178	0.964679		5725836	37.9286	2.43367	2.043	0.0516218	81.7071	10.4286
5724540	71.1955	14.2926	31.422	8.99546	16.2554	13.0076		5725996	1.86636	0.00712141	1.52559	0.00658373	1.97879	0.219507
5724603	3.57929	0.0204384	2.05929	0.0375259	3.02666	0.16189		5726090	1.79347	0.00865407	2.06381	0.00761222	1.80271	0.153715
5724633	2.27544	0.109063	4.73033	0.249138	8.04262	2.45054		5726101	2.65387	0.198722	2.17611	0.0581216	1.75773	0.18175
5724883	68.3162	53.0301	71.0095	47.1946	26.1542	8.20068		5726127	1.62123	0.100727	2.4416	0.129088	3.20957	0.035011
5724933	2.39067	0.0293261	1.80399	0.131245	2.82985	0.310874		5726138	1.60631	0.0133198	2.35847	0.0548442	2.92745	0.324908
5725019	2.26209	0.244973	2.29181	0.130193	2.34127	0.0891232		5726164	2.55284	0.182689	2.72049	0.177745	1.75181	0.0802186
5725039	2.83616	0.149373	1.95793	0.116689	2.05162	0.132396		5726167	2.35661	0.220108	1.62374	0.0404146	2.50543	0.169894
5725185	3.97642	0.230441	3.44528	0.193566	4.95699	0.245622		5726208	1.86813	0.11026	1.6522	0.133456	2.41528	0.0607992
5725193	299.061	23.2995	76.9334	2.50146	15.1384	4.91329		5726292	1.7945	0.0141938	1.71837	0.109808	1.8658	0.167301
5725247	1.72735	0.00188501	3.69325	0.017291	1.76847	0.149263		5726335	2.20351	0.195602	2.02188	0.0562266	2.673	0.886819
5725269	1.81828	0.166485	1.64596	0.0855058	6.55846	0.973333		5726504	1.65238	0.104744	2.35181	0.229625	1.72736	0.067698
5725380	44.1066	10.4754	45.8315	22.6166	14.8111	0.672425		5726533	2.21045	0.0443369	2.4767	0.00379405	2.31245	0.0365337
5725392	4.021	0.0702907	1.94143	0.104863	4.82245	0.0328816		5726560	2.63892	0.0642506	2.59062	0.0122106	1.79709	0.236931
5725406	107.905	23.4468	32.459	5.23833	8.73497	0.711993		5726631	1.97881	0.134059	1.67571	0.00220214	2.60493	0.0594376
5725466	1.79693	0.021384	1.76057	0.00228601	2.81543	0.267438		5726671	2.46773	0.240442	2.19374	0.0975339	2.654	0.297561
5725603	5.41845	1.31714	2.00168	0.333415	4.48902	0.724153		5726803	2.48359	0.0535056	1.89402	0.241264	2.00927	0.0605949
5725610	248.887	256.302	64.3953	58.7135	14.2507	8.2751		5726857	2.35925	0.0412052	2.62906	0.032298	1.91235	0.00339171
5725743	35.313	5.58799	5.24461	0.290825	90.7803	2.96756		5726906	2.3089	0.134931	1.80884	0.127785	3.24119	0.131704
5725928	123.044	13.4009	41.2685	1.72235	20.2523	2.22946		5726991	2.3537	0.26807	2.58318	0.806371	2.36073	0.840223
5725932	105.449	84.6705	26.2456	17.6246	9.51294	4.90335		5727142	2.23048	0.0148888	2.03558	0.137485	2.29732	0.019883
5725938	45.9046	8.20659	29.0545	5.08065	11.9677	2.51014		5727162	1.60365	0.144328	2.08186	0.149456	1.52894	0.0328899
5725952	384.198	96.2869	211.427	91.0954	22.8313	0.482105		5727215	3.21594	0.108103	1.80734	0.161006	5.07167	0.311066
5726014	54.3292	21.9338	30.1499	14.9601	8.05459	1.74622		5727269	4.52503	0.681872	2.18	0.252096	8.86981	2.12002
5726063	12.6449	1.07696	4.8514	0.993518	4.96845	1.54744		5727284	1.53387	0.0390039	1.84479	0.0428039	2.15028	0.115362
5726170	160.627	125.263	49.3629	30.4487	10.54	2.02656		5727322	1.78526	0.050216	1.92985	0.0147303	1.71192	0.06534
5726417	1.89904	0.0982213	1.97593	0.160926	3.31228	0.752367		5727752	1.92655	0.0988748	1.81659	0.0131853	2.10169	0.0926442
5726506	2.80405	0.0811699	1.73499	0.193306	3.61338	0.409424		5727880	6.12763	0.265597	2.73547	0.176275	8.16183	0.20327
5726648	2.15296	0.078155	3.40273	0.217434	6.99378	1.04801		5727969	1.81317	0.0305555	1.96379	0.0335854	1.70338	0.0527005
5726810	2.10706	0.081525	1.7073	0.096661	5.64177	0.0123561		5728233	2.02539	0.00570437	2.05172	0.0752903	2.92553	0.197103
5726826	153.921	28.2568	40.9362	0.874316	8.75035	0.930095		5728355	2.05104	0.04491	1.8268	0.0803999	2.36839	0.239199
5727045	2.89174	0.0345643	6.14915	0.073567	1.96399	0.285659		5728549	2.67056	0.0813196	2.50234	0.0772875	2.97254	0.310897
5727228	61.6165	23.8511	19.1814	6.02338	5.66068	0.131171		5728643	9.21389	0.52354	2.46724	0.0726637	10.2304	1.55497
5727281	210.732	74.9687	64.0996	4.95629	21.9351	4.03693		5728676	2.38399	0.136539	2.52912	0.349116	1.61372	0.0409205
5727328	2.68507	0.156491	1.68679	0.00928106	5.48724	0.836614		5728722	1.98378	0.0309681	1.89243	0.0291209	1.72255	0.0389803
5727424	104.76	10.7639	43.6209	4.41792	9.21722	0.388004		5728741	1.93898	0.101767	2.22639	0.144332	1.9506	0.296421
5727464	91.9241	15.4835	37.967	1.78423	8.2087	1.43844		5728805	2.36645	0.0557105	1.75205	0.110093	2.00154	0.0818303
5727499	233.073	126.459	89.8696	45.474	5.52908	0.0605976		5728994	1.74778	0.158478	1.95648	0.104742	1.80521	0.00801223
5727529	147.244	99.1304	71.1006	67.8935	12.3542	3.93365		5729126	2.01331	0.0524727	2.07011	0.0532071	1.99532	0.0339415
5727578	2.6807	0.0605833	3.84592	0.277036	4.94592	0.478506		5729165	2.271	7.07107e-06	2.24365	0.00169048	2.233	0.021121
5727766	4.7539	0.0173856	1.52405	0.0244135	7.26974	0.118487		5729237	1.77159	0.177212	1.535	0.00381392	1.74802	0.155614
5727836	199.296	98.3182	43.0449	12.6256	22.6336	0.7192		5729247	5.0622	0.636137	1.67277	0.0806551	13.275	7.00044
5727846	3.18272	0.301063	1.74544	0.113918	2.77125	0.234214		5729496	1.72461	0.0278065	1.82213	0.0436815	1.7056	0.0396944
5727933	1.86911	0.096221	3.81037	0.427353	1.71131	0.0668281		5729604	1.73859	0.143315	2.27185	0.50136	1.73425	0.128034
5727991	3.72378	0.456799	1.74824	0.0451008	1.98229	0.111992		5729689	2.05071	0.052002	1.76305	0.0569633	2.26322	0.321439
5728031	10.8043	0.255473	4.05299	0.555788	4.89255	0.520743		5729781	1.79095	0.0101775	1.85747	0.0600354	2.27481	0.185062
5728266	23.9457	4.09033	37.915	8.95461	22.1026	11.0132		5729871	6.11719	0.100855	1.65694	0.0633493	8.62386	0.527217
5728318	4.64876	2.78395	2.23527	1.0249	2.73777	0.198551		5730016	2.16122	0.195571	2.14269	0.146475	1.73737	0.0156191
5728348	116.228	103.144	28.5487	21.7822	17.7679	7.58033		5730111	31.2812	26.4056	2.45447	1.26553	34.1526	17.0262
5728353	1.7449	0.0334797	3.16902	0.43724	4.96918	0.255785		5730119	3.46174	0.022078	2.65823	0.0952738	5.28707	0.930667
5728629	2.02848	0.138685	4.15466	0.318661	1.60706	0.0744747		5730148	1.85003	0.0348509	1.67508	0.0904269	1.85091	0.203263
5728726	35.2301	12.8808	13.4646	6.40961	7.17989	2.45909		5730157	2.09055	0.167072	2.14981	0.0663934	2.24225	0.195073
5728733	1.95338	0.118078	2.63356	0.203448	4.19831	0.216864		5730173	7.99916	0.633104	1.92013	0.0568396	23.9743	3.13113
5728832	1686.46	1067.94	353.363	208.667	28.4201	8.057		5730279	1.59612	0.0429731	2.47686	0.127365	1.62783	0.129922
5728943	2.35748	0.0584737	2.29611	0.017605	3.93478	0.0201406		5730433	1.88326	0.190424	1.56652	0.00602674	2.98299	0.11778
5728958	4.18236	0.611746	2.10249	0.091694	3.3266	0.877537		5730446	2.11351	0.029492	1.73422	0.167219	2.01659	0.035201
5729015	9.00103	0.411832	3.96444	0.138557	18.8527	2.81691		5730469	7.01564	0.00962705	2.7602	0.21237	5.58899	0.135334
5729182	1.85828	0.0974906	4.26322	0.51031	3.21753	0.0329275		5730470	2.91374	0.073257	1.81989	0.0750399	3.34929	0.406013
5729263	48.5516	8.11205	20.9799	4.55385	4.9976	0.120163		5730614	5.96212	0.768432	2.52753	0.0549922	9.85894	0.506935
5729357	2.2348	0.209905	1.60112	0.0731086	4.69024	0.0285614		5730621	1.86807	0.0276936	2.03112	0.188468	2.78437	0.0518993
5729400	48.8184	38.8516	67.8706	63.9335	18.5257	8.88508		5730624	1.96824	0.0112223	1.74383	0.113909	1.67518	0.125049
5729485	123.15	38.5417	37.5583	1.53418	8.36616	3.77239		5730784	2.88378	0.00303759	2.56497	0.194204	1.85377	0.169116
5729574	89.7548	77.7102	49.9587	42.5152	11.759	3.67325		5730794	1.8914	0.0145257	2.21073	0.137693	1.8096	0.0766603
5729877	1.65157	0.0848861	1.72289	0.0596902	1.87692	0.0175896		5730824	1.72172	0.0911331	1.84982	0.290602	1.84075	0.0892666
5729914	145.746	111.966	65.9282	30.1397	17.9443	3.20392		5730837	3.85628	0.0332006	1.65373	0.165679	9.22198	0.681545
5729922	104.417	23.3721	64.2527	18.9267	11.0415	4.78951		5730875	1.76922	0.0037756	1.62568	0.021666	1.86972	0.0267392
5729932	40.058	18.0611	31.1455	23.3244	9.3132	1.74411		5730910	6.34247	0.457981	1.7606	0.118091	6.29953	0.615477
5729947	391.524	18.0405	91.7369	19.5836	29.9709	10.0389		5730937	2.20132	0.0698043	2.60486	0.237865	1.6532	0.0211397
5730330	1.79336	0.118417	1.79862	0.0793898	2.24902	0.148927		5730973	1.68013	0.121979	1.68922	0.127227	2.28551	0.315509
5730454	1.72303	0.0919788	2.00094	0.38622	4.02762	0.297677		5731017	1.837	0.126569	1.85077	0.0424507	2.18239	0.351879
5730606	416.678	448.784	119.508	119.289	14.5161	9.47502		5731022	2.39194	0.305058	2.43837	0.191576	2.74607	0.172899
5730771	2.86927	0.168635	1.93763	0.12075	2.88346	0.000765867		5731086	2.55331	0.255721	2.23967	0.206401	2.99977	0.236964
5730964	2.81835	0.0928457	1.57534	0.0454956	3.09021	0.0213637		5731156	105.215	75.1492	2.46033	0.545688	80.1862	13.6677
5731140	1.86722	0.00129061	1.91125	0.023637	2.76862	0.239129		5731202	1.77544	0.0308275	2.10947	0.111654	2.18806	0.381297
5731233	1.61078	0.0440788	1.96178	0.0344605	5.65183	0.344078		5731272	1.62352	0.066685	1.70449	0.121846	2.09669	0.177709
5731295	4.61722	0.365463	3.1725	0.228469	5.0189	0.103926		5731311	2.15483	0.0596942	1.92126	0.0288419	1.89459	0.219225
5731315	52.4882	6.43097	13.2939	2.2583	6.69475	1.80959		5731334	2.31676	0.0139297	2.459	0.0200099	3.44178	0.0776096
5731419	2.70366	0.338863	1.85014	0.0472425	5.3502	0.686878		5731355	5.1852	0.230025	1.96321	0.21073	9.22089	0.692599
5731493	2.91824	0.0632425	1.69283	0.0158118	3.23217	0.330095		5731373	1.8842	0.101437	1.83809	0.168715	1.79291	0.000545674
5731540	1.99098	0.0164029	4.48341	0.441304	2.74591	0.141989		5731413	2.22478	0.0582338	2.05188	0.0598721	2.49071	0.184709
5731590	310.94	164.438	122.723	33.7346	19.215	6.0801		5731434	2.91394	0.335307	1.77375	0.0188959	2.61254	0.429472
5731623	2.10814	0.0587714	1.81415	0.100998	2.44757	0.0451956		5731629	1.62683	0.0237158	1.7799	0.220834	2.01975	0.141696
5732045	1.57051	0.0372839	1.71856	0.0700147	1.6382	0.176705		5731646	1.55633	0.0136581	1.59718	0.0929947	1.76271	0.0674214
5732170	4.01937	0.274843	3.05074	0.21364	3.18458	0.17331		5731653	1.6406	0.0917312	2.0699	0.0221563	1.71851	0.104461
5732297	213.936	130.795	50.3389	38.1352	11.3054	2.14086		5731674	1.85665	0.0103489	2.20807	0.0423775	1.76333	0.244898
5732606	2.53941	0.440927	2.21423	0.123787	3.53649	0.182267		5731727	1.70613	0.00934244	1.54713	0.0296708	2.06593	0.197592
5732747	2.81358	0.094258	2.52073	0.0826218	7.3179	0.87908		5731813	2.31006	0.317166	2.24541	0.195377	2.54616	0.157018
5732928	1.96254	0.0198768	2.81187	0.0679329	1.73953	0.205751		5731818	2.5628	0.0134642	1.75391	0.00148351	6.1618	0.709032
5733257	2.57678	0.244016	2.88519	0.386904	2.80372	0.265615		5731864	4.7109	1.12548	4.20428	0.545907	8.06015	2.68651
5733632	327.776	340.774	125.558	94.9588	21.0609	6.98449		5731874	3.22511	0.102429	1.70844	0.04502	3.40129	0.213564
5733837	3.32529	0.0797276	2.06211	0.0536991	2.55005	0.425613		5731894	26.2436	9.05141	1.90351	0.42717	31.4247	15.461
5733885	2.69634	0.0310322	1.79585	0.0198635	8.79281	0.333256		5731969	3.9435	0.115553	1.87253	0.359951	9.07449	1.47216
5734003	36.7082	0.251847	4.44076	0.0447185	38.7158	3.69712		5731971	2.80117	0.169352	2.55936	0.490396	1.97106	0.15751
5734289	2.80961	0.149988	2.09096	0.0833341	1.73317	0.0836102		5732040	1.79667	0.0572241	1.74266	0.0988525	2.24307	0.256818
5734389	2.33603	0.0290788	1.64192	0.125814	2.88175	0.20662		5732041	1.70852	0.0175965	1.80234	0.0341868	3.21282	0.0724635
5734734	129.793	130.143	34.8267	37.1187	14.9219	7.26545		5732044	1.99738	0.134413	1.74734	0.0748994	1.87499	0.517766
5734762	1.71224	0.112157	1.81183	0.0630171	2.17413	0.144882		5732300	1.66531	0.0731825	1.68577	0.0104872	1.86342	0.141109
5734782	58.3654	8.50733	21.9644	6.39938	14.5768	6.78143		5732449	1.88477	0.0677749	1.66965	0.214701	1.58385	0.0693605
5735038	80.8275	44.46	28.8383	15.9468	11.2449	7.3851		5732462	1.83739	0.00100621	1.66127	0.0248374	2.21198	0.0966105
5735131	1.82995	0.0264793	2.65416	0.414656	2.19542	0.445392		5732516	11.042	7.76792	9.85879	9.5147	5.71408	4.31735
5735180	138.244	63.6638	33.3069	8.12985	13.0415	2.29315		5732538	2.52899	0.0728007	1.5564	0.0519638	2.54062	0.0917832
5735236	2.42569	0.113068	2.46276	0.0324875	2.72737	0.422005		5732541	2.44716	0.188724	2.04151	0.00423416	2.22027	0.216964
5735354	132.472	44.4701	118.531	41.8152	8.20397	1.64085		5732632	65.9322	22.7472	1.93603	0.315244	200.235	138.448
5735466	182.777	52.6513	38.5004	4.89373	12.3519	0.681865		5732846	2.05151	0.112512	1.71439	0.216627	1.92026	0.0673639
5735497	2.70064	0.112267	2.20882	0.0795714	5.86668	0.848611		5732904	81.109	1.38639	2.72602	0.543677	254.635	53.15
5735844	187.321	208.346	95.365	92.6294	24.0375	17.8789		5732945	33.8763	16.5169	1.92064	0.114726	93.3654	6.66216
5735884	111.277	40.9925	128.735	95.3113	7.76545	0.963099		5733021	3.05645	0.379271	2.24139	0.30438	3.75215	0.375573
5735905	109.937	28.1445	32.1438	3.64208	16.0005	1.58013		5733045	2.53361	0.275419	1.69102	0.0553771	4.01134	0.014686
5735934	2.60264	0.191443	1.96783	0.157454	4.71836	0.174711		5733094	81.7128	27.5323	2.51066	0.573639	99.0801	24.5701
5736012	2.91727	0.0698001	2.65756	0.11836	4.25995	0.456434		5733325	40.1317	23.0225	1.85794	0.352698	111.035	23.1875
5736039	1.62479	0.00266113	1.54438	0.0525011	4.29884	0.151375		5733331	1.76041	0.00490124	1.65139	0.00853407	1.85266	0.223523
5736110	4.3635	0.208723	4.15105	0.0128962	9.03871	0.326436		5733452	8.40665	0.991941	3.93417	0.358006	13.518	2.25707
5736119	4.93732	0.283105	2.44405	0.177151	4.05915	0.275538		5733498	1.98148	0.0382932	1.77526	0.062035	1.90838	0.0742556
5736312	2.87089	0.0345265	5.97458	0.38776	2.14223	0.27125		5733505	1.60773	0.0577976	1.65538	0.0983356	2.23056	0.251773
5736377	279.244	268.201	61.2216	51.6269	25.9149	7.21726		5734248	2.28929	0.117827	1.68714	0.00485012	1.81855	0.374235
5736781	2.01005	0.110043	2.14219	0.0321334	2.08452	0.166974		5734321	1.9137	0.0378249	2.59372	0.187107	1.64849	0.055998
5736933	2.48383	0.0165858	2.89369	0.302977	2.35064	0.0663223		5734396	1.97512	0.063823	1.78432	0.0369484	1.72546	0.0782048
5737365	130.389	22.9073	36.1606	2.20709	10.6793	1.13128		5734871	2.31041	0.252419	1.72141	0.272363	2.49157	0.170271
5738031	1.57761	0.0901579	2.34607	0.0659084	2.26695	0.259381		5734919	1.65552	0.0920268	2.36521	0.0390228	1.81602	0.374136
5738202	9.23749	0.991497	3.3977	0.158482	3.78819	0.069166		5735020	2.21632	0.120273	1.81191	0.10464	1.83249	0.0614562
5738592	1.85179	0.0976834	1.63804	0.0205462	2.07136	0.149711		5735065	11.3099	0.388556	1.62214	0.168611	35.1731	10.489
5740202	142.691	10.8721	61.9895	5.48751	11.1591	0.786057		5735246	2.32762	0.383594	1.70322	0.186734	2.36189	0.202427
								5735365	1.81438	0.0372488	2.36055	0.115865	2.09304	0.00361218
								5735615	2.03404	0.213985	1.57536	0.000369675	2.7472	0.0248878
								5735774	1.92909	0.207341	1.73342	0.0622014	2.33359	0.0325548
								5735819	1.83075	0.0965833	1.57957	0.0340135	1.71979	0.117115
								5735821	1.76923	0.0764259	2.35262	0.00379504	1.64594	0.179499
								5735842	1.74952	0.14318	1.7824	0.111133	1.64667	0.0429997
								5735847	2.30981	0.167787	1.8094	0.109956	2.32055	0.0846659
								5735859	2.93217	0.0057666	2.39231	0.201598	1.77105	0.0825455
								5735931	2.70083	0.296963	1.58302	0.111881	3.31898	0.0253237
								5735978	2.27519	0.0356252	1.5913	0.0455612	3.18652	0.200311
								5736089	2.11699	0.0128611	2.30368	0.0169445	1.71138	0.0466537
								5736140	1.79577	0.149827	2.32108	0.229717	1.98552	0.0925746
								5736199	2.21084	0.0318187	2.18676	0.0113373	5.40191	0.582787
								5736711	1.84387	0.0268246	1.68567	0.0252796	2.42189	0.034148
								5736782	1.7972	0.0799564	2.2491	0.0786619	1.88448	0.180819
								5736895	53.1194	5.64368	1.98278	0.0867701	67.7257	8.79974
								5737162	1.6175	0.159265	1.56914	0.00365772	1.81619	0.0905356
								5737368	3.65538	0.167997	1.98965	0.00631779	4.11382	0.0751605
								5737383	29.8712	1.94416	2.46331	0.474826	45.1407	0.278177
								5737692	2.72733	0.221168	3.12549	0.267726	1.63636	0.0844449
								5737818	2.48856	0.0164901	2.7619	0.00638418	2.83696	0.205281
								5738145	1.73531	0.0132694	2.1118	0.0671169	1.82204	0.174413
								5738742	1.61192	0.0573891	1.64287	0.125227	1.93362	0.0608931
								5738795	3.57502	0.0119242	1.77034	0.00415241	3.07162	0.368831
								5738953	1.79809	0.104146	2.57171	0.156124	1.74126	0.17691
								5738957	4.88116	0.164281	3.08077	0.162976	2.48553	0.193627
								5739260	4.57843	0.306203	2.12281	0.0300324	6.73349	0.160051
								5739265	1.80673	0.019281	1.65509	0.116465	3.27301	0.0198061
								5739324	6.00446	0.346643	2.16868	0.396586	7.39865	0.0551041
								5739414	1.66685	0.211014	1.67886	0.0234895	1.56759	0.089363
								5739763	2.1028	0.117679	2.22545	0.0357274	2.39001	0.0897113
								5740004	1.97399	0.0576864	1.75324	0.0530819	3.46046	0.165768
